# Supplementary material for: The wheat Seven in absentia gene is associated with increases in biomass and yield in hot climates
Source: PubMed Central journal article supplement (PMC8096608; doi:10.1093/jxb/erab044), 2021-02-05
Supplement: erab044_suppl_supplementary-figure-s12.pdf [file erab044_suppl_supplementary-figure-s12.pdf]

**Supplementary Fig. S12** CLUSTAL multiple sequence alignment of *TaSINA* gene sequences of 14 wheat varieties by MUSCLE (v3.8, EMBL-EBI). Purple: rare variants. v: variants between RAC875 and Kukri haplotypes. Yellow: promoter domain specific of RAC875 haplotype. Blue: promoter domain specific of Kukri haplotype. Green: position of start and stop of CDS.

v

```

Drysdale      ---ATAATGAGTTATCACTCCCTATTCGGGTGAATCACAAAAGTTTAAATTAAGAACAAT
RAC875        ---ATAATGAGTTATCACTCCCTATTCGGGTGAATCACAAAAGTTTAAATTAAGAACAAT
Norin61       ---ATAATGAGTTATCACTCCCTATTCGGGTGAATCACAAAAGTTTAAATTAAGAACAAT
Jagger        -ACATAATGAGTTATCACTCCCTATTCGGGTGAATCACAAAAGTTTAAATTAAGAACAAT
Mattis        -ACATAATGAGTTATCACTCCCTATTCGGGTGAATCACAAAAGTTTAAATTAAGAACAAT
Julius        --CATAATGAGTTATCACTCCCTATTCGGGTGAATCACAAAAGTTTAAATTAAGAACAAT
Arina         ---ATAATGAGTTATCACTCCCTATTCGGGTGAATCACAAAAGTTTAAATTAAGAACAAT
Spelta        ---ATAATGAGTTATCACTCCCTATTCGGGTGAATCACAAAAGTTTAAATTAAGAACAAT
Lancer        ---ATAATGAGTTATCACTCCCTATTCGGGTGAATCACAAAAGTTTAAATTAAGAACAAT
Gladius       ---ATAATGAGTTATCACTCCCTATTCGGGTGAATCACAAAAGTTTAAATTAAGAACAAT
Kukri         ---ATAATGAGTTATCACTCCCTATTCGGGTGAATCACAAAAGTTTAAATTAAGAACAAT
Landmark      AACATAATGAGTTATCACTCCCTATTCGGGTGAATCACAAAAGTTTAAATTAAGAACAAT
Mace          ---ATAATGAGTTATCACTCCCTATTCGGGTGAATCACAAAAGTTTAAATTAAGAACAAT
Stanley       ---ATAATGAGTTATCACTCCCTATTCGGGTGAATCACAAAAGTTTAAATTAAGAACAAT
              *****

Drysdale      CCATTCCATCAAACCTTTGATAATATTAGCTATTAATGTATAAAGATTAATACAATTATAG
RAC875        CCATTCCATCAAACCTTTGATAATATTAGCTATTAATGTATAAAGATTAATACAATTATAG
Norin61       CCATTCCATCAAACCTTTGATAATATTAGCTATTAATGTATAAAGATTAATACAATTATAG
Jagger        CCATTCCATCAAACCTTTGATAATATTAGCTATTAATGTATAAAGATTAATACAATTATAG
Mattis        CCATTCCATCAAACCTTTGATAATATTAGCTATTAATGTATAAAGATTAATACAATTATAG
Julius        CCATTCCATCAAACCTTTGATAATATTAGCTATTAATGTATAAAGATTAATACAATTATAG
Arina         CCATTCCATCAAACCTTTGATAATATTAGCTATTAATGTATAAAGATTAATACAATTATAG
Spelta        CCATTCCATCAAACCTTTGATAATATTAGCTATTAATGTATAAAGATTAATACAATTATAG
Lancer        CCATTCCATCAAACCTTTGATAATATTAGCTATTAATGTATAAAGATTAATACAATTATAG
Gladius       CCATTCCATCAAACCTTTGATAATATTAGCTATTAATGTATAAAGATTAATACAATTATAG
Kukri         CCATTCCATCAAACCTTTGATAATATTAGCTATTAATGTATAAAGATTAATACAATTATAG
Landmark      CCATTCCATCAAACCTTTGATAATATTAGCTATTAATGTATAAAGATTAATACAATTATAG
Mace          CCATTCCATCAAACCTTTGATAATATTAGCTATTAATGTATAAAGATTAATACAATTATAG
STANLEY       CCATTCCATCAAACCTTTGATAATATTAGCTATTAATGTATAAAGATTAATACAATTATAG
              *****

              v
Drysdale      CTTTATTCGGCATGGATGCTATTCATAGTACCATTATTCATAATATTATATAGAGTTAA
RAC875        CTTTATTCGGCATGGATGCTATTCATAGTACCATTATTCATAATATTATATAGAGTTAA
Norin61       CTTTATTCGGCATGGATGCTATTCATAGTACCATTATTCATAATATTATATAGAGTTAA
Jagger        CTTTATTCGGCATGGATGCTATTCATAGTACCATTATTCATAATATTATATAGAGTTAA
Mattis        CTTTATTCGGCATGGATGCTATTCATAGTACCATTATTCATAATATTATATAGAGTTAA
Julius        CTTTATTCGGCATGGATGCTATTCATAGTACCATTATTCATAATATTATATAGAGTTAA
Arina         CTTTATTCGGCATGGATGCTATTCATAGTACCATTATTCATAATATTATATAGAGTTAA
Spelta        CTTTATTCGGCATGGATGCTATTCATAGTACCATTATTCATAATATTATATAGAGTTAA
Lancer        CTTTATTCGGCATGGATGCTATTCATAGTACCATTATTCATAATATTATATAGAGTTAA
Gladius       CTTTATTCGGCATGGATGCTATTCATAGTACCATTATTCATAATATTATATAGAGTTAA
Kukri         CTTTATTCGGCATGGATGCTATTCATAGTACCATTATTCATAATATTATATAGAGTTAA
Landmark      CTTTATTCGGCATGGATGCTATTCATAGTACCATTATTCATAATATTATATAGAGTTAA
Mace          CTTTATTCGGCATGGATGCTATTCATAGTACCATTATTCATAATATTATATAGAGTTAA
STANLEY       CTTTATTCGGCATGGATGCTATTCATAGTACCATTATTCATAATATTATATAGAGTTAA
              *****

Drysdale      ACATACTGTAGATTATCCCAAATTGTAACAACCTTAAATAATAATACTCCCTCCATTTTT
RAC875        ACATACTGTAGATTATCCCAAATTGTAACAACCTTAAATAATAATACTCCCTCCATTTTT
Norin61       ACATACTGTAGATTATCCCAAATTGTAACAACCTTAAATAATAATACTCCCTCCATTTTT
Jagger        ACATACTGTAGATTATCCCAAATTGTAACAACCTTAAATAATAATACTCCCTCCATTTTT
Mattis        ACATACTGTAGATTATCCCAAATTGTAACAACCTTAAATAATAATACTCCCTCCATTTTT
Julius        ACATACTGTAGATTATCCCAAATTGTAACAACCTTAAATAATAATACTCCCTCCATTTTT
Arina         ACATACTGTAGATTATCCCAAATTGTAACAACCTTAAATAATAATACTCCCTCCATTTTT
Spelta        ACATACTGTAGATTATCCCAAATTGTAACAACCTTAAATAATAATACTCCCTCCATTTTT
Lancer        ACATACTGTAGATTATCCCAAATTGTAACAACCTTAAATAATAATACTCCCTCCATTTTT
Gladius       ACATACTGTAGATTATCCCAAATTGTAACAACCTTAAATAATAATACTCCCTCCATTTTT
Kukri         ACATACTGTAGATTATCCCAAATTGTAACAACCTTAAATAATAATACTCCCTCCATTTTT
Landmark      ACATACTGTAGATTATCCCAAATTGTAACAACCTTAAATAATAATACTCCCTCCATTTTT
Mace          ACATACTGTAGATTATCCCAAATTGTAACAACCTTAAATAATAATACTCCCTCCATTTTT
STANLEY       ACATACTGTAGATTATCCCAAATTGTAACAACCTTAAATAATAATACTCCCTCCATTTTT
              *****

```

Drysdale ATATACAAGGCCACTATGGAATATACATTTTGCATATATATAAGGCCACCAACAGTAATC  
RAC875 ATATACAAGGCCACTATGGAATATACATTTTGCATATATATAAGGCCACCAACAGTAATC  
Norin61 ATATACAAGGCCACTATGGAATATACATTTTGCATATATATAAGGCCACCAACAGTAATC  
Jagger ATATACAAGGCCACTATGGAATATACATTTTGCATATATATAAGGCCACCAACAGTAATC  
Mattis ATATACAAGGCCACTATGGAATATACATTTTGCATATATATAAGGCCACCAACAGTAATC  
Julius ATATACAAGGCCACTATGGAATATACATTTTGCATATATATAAGGCCACCAACAGTAATC  
Arina ATATACAAGGCCACTATGGAATATACATTTTGCATATATATAAGGCCACCAACAGTAATC  
Spelta ATATACAAGGCCACTATGGAATATACATTTTGCATATATATAAGGCCACCAACAGTAATC  
Lancer ATATACAAGGCCACTATGGAATATACATTTTGCATATATATAAGGCCACCAACAGTAATC  
Gladius ATATACAAGGCCACTATGGAATATACATTTTGCATATATATAAGGCCACCAACAGTAATC  
Kukri ATATACAAGGCCACTATGGAATATACATTTTGCATATATATAAGGCCACCAACAGTAATC  
Landmark ATATACAAGGCCACTATGGAATATACATTTTGCATATATATAAGGCCACCAACAGTAATC  
Mace ATATACAAGGCCACTATGGAATATACATTTTGCATATATATAAGGCCACCAACAGTAATC  
STANLEY ATATACAAGGCCACTATGGAATATACATTTTGCATATATATAAGGCCACCAACAGTAATC  
\*\*\*\*\*

V v

Drysdale GAGGCAAATTAATGATATTTTCTCGTACTAACAACCTGTTTAATACTTGCATGCTTGCA  
RAC875 GAGGCAAATTAATGATATTTTCTCGTACTAACAACCTGTTTAATACTTGCATGCTTGCA  
Norin61 GAGGCAAATTAATGATATTTTCTCGTACTAACAACCTGTTTAATACTTGCATGCTTGCA  
Jagger GAGGCAAATTAATGATATTTTCTCGTACTAACAACCTGTTTAATACTTGCATGCTTGCA  
Mattis GAGGCAAATTAATGATATTTTCTCGTACTAACAACCTGTTTAATACTTGCATGCTTGCA  
Julius GAGGCAAATTAATGATATTTTCTCGTACTAACAACCTGTTTAATACTTGCATGCTTGCA  
Arina GAGGCAAATTAATGATATTTTCTCGTACTAACAACCTGTTTAATACTTGCATGCTTGCA  
Spelta GAGGCAAATTAATGATATTTTCTCGTACTAACAACCTGTTTAATACTTGCATGCTTGCA  
Lancer GAGGCAAATTAATGATATTTTCTCGTACTAACAACCTGTTTAATACTTGCATGCTTGCA  
Gladius GAGGCAAATTAATGATATTTTCTCGTACTAACAACCTGTTTAATACTTGCATGCTTGCA  
Kukri GAGGCAAATTAATGATATTTTCTCGTACTAACAACCTGTTTAATACTTGCATGCTTGCA  
Landmark GAGGCAAATTAATGATATTTTCTCGTACTAACAACCTGTTTAATACTTGCATGCTTGCA  
Mace GAGGCAAATTAATGATATTTTCTCGTACTAACAACCTGTTTAATACTTGCATGCTTGCA  
STANLEY GAGGCAAATTAATGATATTTTCTCGTACTAACAACCTGTTTAATACTTGCATGCTTGCA  
\*\*\*\*\*

v

Drysdale ATCATAATGACAGTCAGCTACTTCCTCCACTCAGTTTTTTTTTGCATGCATGTGGAGTATT  
RAC875 ATCATAATGACAGTCAGCTACTTCCTCCACTCAGTTTTTTTTTGCATGCATGTGGAGTATT  
Norin61 ATCATAATGACAGTCAGCTACTTCCTCCACTCAGTTTTTTTTTGCATGCATGTGGAGTATT  
Jagger ATCATAATGACAGTCAGCTACTTCCTCCACTCAGTTTTTTTTTGCATGCATGTGGAGTATT  
Mattis ATCATAATGACAGTCAGCTACTTCCTCCACTCAGTTTTTTTTTGCATGCATGTGGAGTATT  
Julius ATCATAATGACAGTCAGCTACTTCCTCCACTCAGTTTTTTTTTGCATGCATGTGGAGTATT  
Arina ATCATAATGACAGTCAGCTACTTCCTCCACTCAGTTTTTTTTTGCATGCATGTGGAGTATT  
Spelta ATCATAATGACAGTCAGCTACTTCCTCCACTCAGTTTTTTTTTGCATGCATGTGGAGTATT  
Lancer ATCATAATGACAGTCAGCTACTTCCTCCACTCAG-TTTTTTTTGCATGCATGTGGAGTATT  
Gladius ATCATAATGACAGTCAGCTACTTCCTCCACTCAG-TTTTTTTTGCATGCATGTGGAGTATT  
Kukri ATCATAATGACAGTCAGCTACTTCCTCCACTCAG-TTTTTTTTGCATGCATGTGGAGTATT  
Landmark ATCATAATGACAGTCAGCTACTTCCTCCACTCAG-TTTTTTTTGCATGCATGTGGAGTATT  
Mace ATCATAATGACAGTCAGCTACTTCCTCCACTCAG-TTTTTTTTGCATGCATGTGGAGTATT  
STANLEY ATCATAATGACAGTCAGCTACTTCCTCCACTCAG-TTTTTTTTGCATGCATGTGGAGTATT  
\*\*\*\*\*

Drysdale AATGATCCCAGTAAACAAGAAGAAAAGTTGACTTGTAAGCAGGCATTAATTTTACATT  
RAC875 AATGATCCCAGTAAACAAGAAGAAAAGTTGACTTGTAAGCAGGCATTAATTTTACATT  
Norin61 AATGATCCCAGTAAACAAGAAGAAAAGTTGACTTGTAAGCAGGCATTAATTTTACATT  
Jagger AATGATCCCAGTAAACAAGAAGAAAAGTTGACTTGTAAGCAGGCATTAATTTTACATT  
Mattis AATGATCCCAGTAAACAAGAAGAAAAGTTGACTTGTAAGCAGGCATTAATTTTACATT  
Julius AATGATCCCAGTAAACAAGAAGAAAAGTTGACTTGTAAGCAGGCATTAATTTTACATT  
Arina AATGATCCCAGTAAACAAGAAGAAAAGTTGACTTGTAAGCAGGCATTAATTTTACATT  
Spelta AATGATCCCAGTAAACAAGAAGAAAAGTTGACTTGTAAGCAGGCATTAATTTTACATT  
Lancer AATGATCCCAGTAAACAAGAAGAAAAGTTGACTTGTAAGCAGGCATTAATTTTACATT  
Gladius AATGATCCCAGTAAACAAGAAGAAAAGTTGACTTGTAAGCAGGCATTAATTTTACATT  
Kukri AATGATCCCAGTAAACAAGAAGAAAAGTTGACTTGTAAGCAGGCATTAATTTTACATT  
Landmark AATGATCCCAGTAAACAAGAAGAAAAGTTGACTTGTAAGCAGGCATTAATTTTACATT  
Mace AATGATCCCAGTAAACAAGAAGAAAAGTTGACTTGTAAGCAGGCATTAATTTTACATT  
STANLEY AATGATCCCAGTAAACAAGAAGAAAAGTTGACTTGTAAGCAGGCATTAATTTTACATT  
\*\*\*\*\*

Drysdale GATACCTGTAATCCAAGTTTGTGGCCTTATATACAAAAATGGAGGGAGTATAAAAAATCTA  
 RAC875 GATACCTGTAATCCAAGTTTGTGGCCTTATATACAAAAATGGAGGGAGTATAAAAAATCTA  
 Norin61 GATACCTGTAATCCAAGTTTGTGGCCTTATATACAAAAATGGAGGGAGTATAAAAAATCTA  
 Jagger GATACCTGTAATCCAAGTTTGTGGCCTTATATACAAAAATGGAGGGAGTATAAAAAATCTA  
 Mattis GATACCTGTAATCCAAGTTTGTGGCCTTATATACAAAAATGGAGGGAGTATAAAAAATCTA  
 Julius GATACCTGTAATCCAAGTTTGTGGCCTTATATACAAAAATGGAGGGAGTATAAAAAATCTA  
 Arina GATACCTGTAATCCAAGTTTGTGGCCTTATATACAAAAATGGAGGGAGTATAAAAAATCTA  
 Spelta GATACCTGTAATCCAAGTTTGTGGCCTTATATACAAAAATGGAGGGAGTATAAAAAATCTA  
 Lancer GGTACCTGTAATCCAAGTTTGTGGCCTTATATACAAAAATGGAGGGAGTATAAAAAATCTA  
 Gladius GGTACCTGTAATCCAAGTTTGTGGCCTTATATACAAAAATGGAGGGAGTATAAAAAATCTA  
 Kukri GGTACCTGTAATCCAAGTTTGTGGCCTTATATACAAAAATGGAGGGAGTATAAAAAATCTA  
 Landmark GGTACCTGTAATCCAAGTTTGTGGCCTTATATACAAAAATGGAGGGAGTATAAAAAATCTA  
 Mace GGTACCTGTAATCCAAGTTTGTGGCCTTATATACAAAAATGGAGGGAGTATAAAAAATCTA  
 STANLEY GGTACCTGTAATCCAAGTTTGTGGCCTTATATACAAAAATGGAGGGAGTATAAAAAATCTA  
 \* \*\*\*\*\*

Drysdale GCAGCGCAAATGCGCGGATAAAGTGTGCTAACTACTCAATAAGAGGTTAAAAGAAGATTCA  
 RAC875 GCAGCGCAAATGCGCGGATAAAGTGTGCTAACTACTCAATAAGAGGTTAAAAGAAGATTCA  
 Norin61 GCAGCGCAAATGCGCGGATAAAGTGTGCTAACTACTCAATAAGAGGTTAAAAGAAGATTCA  
 Jagger GCAGCGCAAATGCGCGGATAAAGTGTGCTAACTACTCAATAAGAGGTTAAAAGAAGATTCA  
 Mattis GCAGCGCAAATGCGCGGATAAAGTGTGCTAACTACTCAATAAGAGGTTAAAAGAAGATTCA  
 Julius GCAGCGCAAATGCGCGGATAAAGTGTGCTAACTACTCAATAAGAGGTTAAAAGAAGATTCA  
 Arina GCAGCGCAAATGCGCGGATAAAGTGTGCTAACTACTCAATAAGAGGTTAAAAGAAGATTCA  
 Spelta GCAGCGCAAATGCGCGGATAAAGTGTGCTAACTACTCAATAAGAGGTTAAAAGAAGATTCA  
 Lancer GCAGCGCAAATGCGCGGATAAAGTGTGCTAACTACTCAATAAGAGGTTAAAAGAAGATTCA  
 Gladius GCAGCGCAAATGCGCGGATAAAGTGTGCTAACTACTCAATAAGAGGTTAAAAGAAGATTCA  
 Kukri GCAGCGCAAATGCGCGGATAAAGTGTGCTAACTACTCAATAAGAGGTTAAAAGAAGATTCA  
 Landmark GCAGCGCAAATGCGCGGATAAAGTGTGCTAACTACTCAATAAGAGGTTAAAAGAAGATTCA  
 Mace GCAGCGCAAATGCGCGGATAAAGTGTGCTAACTACTCAATAAGAGGTTAAAAGAAGATTCA  
 STANLEY GCAGCGCAAATGCGCGGATAAAGTGTGCTAACTACTCAATAAGAGGTTAAAAGAAGATTCA  
 \*\*\*\*\*

Drysdale CATGCACAACCTGTAGAAAACAAAAGGCCACACAACCAGTATTTAAAAAATGTACATTAAT  
 RAC875 CATGCACAACCTGTAGAAAACAAAAGGCCACACAACCAGTATTTAAAAAATGTACATTAAT  
 Norin61 CATGCACAACCTGTAGAAAACAAAAGGCCACACAACCAGTATTTAAAAAATGTACATTAAT  
 Jagger CATGCACAACCTGTAGAAAACAAAAGGCCACACAACCAGTATTTAAAAAATGTACATTAAT  
 Mattis CATGCACAACCTGTAGAAAACAAAAGGCCACACAACCAGTATTTAAAAAATGTACATTAAT  
 Julius CATGCACAACCTGTAGAAAACAAAAGGCCACACAACCAGTATTTAAAAAATGTACATTAAT  
 Arina CATGCACAACCTGTAGAAAACAAAAGGCCACACAACCAGTATTTAAAAAATGTACATTAAT  
 Spelta CATGCACAACCTGTAGAAAACAAAAGGCCACACAACCAGTATTTAAAAAATGTACATTAAT  
 Lancer CATGCACAACCTGTAGAAAACAAAAGGCCACACAACCAGTATTTAAAAAATGTACATTAAT  
 Gladius CATGCACAACCTGTAGAAAACAAAAGGCCACACAACCAGTATTTAAAAAATGTACATTAAT  
 Kukri CATGCACAACCTGTAGAAAACAAAAGGCCACACAACCAGTATTTAAAAAATGTACATTAAT  
 Landmark CATGCACAACCTGTAGAAAACAAAAGGCCACACAACCAGTATTTAAAAAATGTACATTAAT  
 Mace CATGCACAACCTGTAGAAAACAAAAGGCCACACAACCAGTATTTAAAAAATGTACATTAAT  
 STANLEY CATGCACAACCTGTAGAAAACAAAAGGCCACACAACCAGTATTTAAAAAATGTACATTAAT  
 \*\*\*\*\*

Drysdale TGGACTCCCTTCATTCTACTTACCATGCACATATTTTTTCTAGTTTTTCGTGATTATC  
 RAC875 TGGACTCCCTTCATTCTACTTACCATGCACATATTTTTTCTAGTTTTTCGTGATTATC  
 Norin61 TGGACTCCCTTCATTCTACTTACCATGCACATATTTTTTCTAGTTTTTCGTGATTATC  
 Jagger TGGACTCCCTTCATTCTACTTACCATGCACATATTTTTTCTAGTTTTTCGTGATTATC  
 Mattis TGGACTCCCTTCATTCTACTTACCATGCACATATTTTTTCTAGTTTTTCGTGATTATC  
 Julius TGGACTCCCTTCATTCTACTTACCATGCACATATTTTTTCTAGTTTTTCGTGATTATC  
 Arina TGGACTCCCTTCATTCTACTTACCATGCACATATTTTTTCTAGTTTTTCGTGATTATC  
 Spelta TGGACTCCCTTCATTCTACTTACCATGCACATATTTTTTCTAGTTTTTCGTGATTATC  
 Lancer TGGACTCCCTTCATTCTACTTACCATGCACATATTTTTTCTAGTTTTTCGTGATTATC  
 Gladius TGGACTCCCTTCATTCTACTTACCATGCACATATTTTTTCTAGTTTTTCGTGATTATC  
 Kukri TGGACTCCCTTCATTCTACTTACCATGCACATATTTTTTCTAGTTTTTCGTGATTATC  
 Landmark TGGACTCCCTTCATTCTACTTACCATGCACATATTTTTTCTAGTTTTTCGTGATTATC  
 Mace TGGACTCCCTTCATTCTACTTACCATGCACATATTTTTTCTAGTTTTTCGTGATTATC  
 STANLEY TGGACTCCCTTCATTCTACTTACCATGCACATATTTTTTCTAGTTTTTCGTGATTATC  
 \*\*\*\*\*

Drysdale TAGGGTATTATGGTTCCACACAGATGATTCTCTATCTTTCCAACCCTTATTTTGGGTAG  
RAC875 TAGGGTATTATGGTTCCACACAGATGATTCTCTATCTTTCCAACCCTTATTTTGGGTAG  
Norin61 TAGGGTATTATGGTTCCACACAGATGATTCTCTATCTTTCCAACCCTTATTTTGGGTAG  
Jagger TAGGGTATTATGGTTCCACACAGATGATTCTCTATCTTTCCAACCCTTATTTTGGGTAG  
Mattis TAGGGTATTATGGTTCCACACAGATGATTCTCTATCTTTCCAACCCTTATTTTGGGTAG  
Julius TAGGGTATTATGGTTCCACACAGATGATTCTCTATCTTTCCAACCCTTATTTTGGGTAG  
Arina TAGGGTATTATGGTTCCACACAGATGATTCTCTATCTTTCCAACCCTTATTTTGGGTAG  
Spelta TAGGGTATTATGGTTCCACACAGATGATTCTCTATCTTTCCAACCCTTATTTTGGGTAG  
Lancer TAGGGTATTATGGTTCCACACAGATGATTCTCTATCTTTCCAACCCTTATTTTGGGTAG  
Gladius TAGGGTATTATGGTTCCACACAGATGATTCTCTATCTTTCCAACCCTTATTTTGGGTAG  
Kukri TAGGGTATTATGGTTCCACACAGATGATTCTCTATCTTTCCAACCCTTATTTTGGGTAG  
Landmark TAGGGTATTATGGTTCCACACAGATGATTCTCTATCTTTCCAACCCTTATTTTGGGTAG  
Mace TAGGGTATTATGGTTCCACACAGATGATTCTCTATCTTTCCAACCCTTATTTTGGGTAG  
STANLEY TAGGGTATTATGGTTCCACACAGATGATTCTCTATCTTTCCAACCCTTATTTTGGGTAG  
\*\*\*\*\*

v

Drysdale TACTACCAATGCATATATTATCAATGTTCTTTCCATAAAAATGCTCCCGTGACATTAAC TA  
RAC875 TACTACCAATGCATATATTATCAATGTTCTTTCCATAAAAATGCTCCCGTGACATTAAC TA  
Norin61 TACTACCAATGCATATATTATCAATGTTCTTTCCATAAAAATGCTCCCGTGACATTAAC TA  
Jagger TACTACCAATGCATATATTATCAATGTTCTTTCCATAAAAATGCTCCCGTGACATTAAC TA  
Mattis TACTACCAATGCATATATTATCAATGTTCTTTCCATAAAAATGCTCCCGTGACATTAAC TA  
Julius TACTACCAATGCATATATTATCAATGTTCTTTCCATAAAAATGCTCCCGTGACATTAAC TA  
Arina TACTACCAATGCATATATTATCAATGTTCTTTCCATAAAAATGCTCCCGTGACATTAAC TA  
Spelta TACTACCAATGCATATATTATCAATGTTCTTTCCATAAAAATGCTCCCGTGACATTAAC TA  
Lancer TACTACCAATGCATATATTATCAATGTTCTTTCCATAAAAATGCTCCCGTGACATTAAC TA  
Gladius TACTACCAATGCATATATTATCAATGTTCTTTCCATAAAAATGCTCCCGTGACATTAAC TA  
Kukri TACTACCAATGCATATATTATCAATGTTCTTTCCATAAAAATGCTCCCGTGACATTAAC TA  
Landmark TACTACCAATGCATATATTATCAATGTTCTTTCCATAAAAATGCTCCCGTGACATTAAC TA  
Mace TACTACCAATGCATATATTATCAATGTTCTTTCCATAAAAATGCTCCCGTGACATTAAC TA  
STANLEY TACTACCAATGCATATATTATCAATGTTCTTTCCATAAAAATGCTCCCGTGACATTAAC TA  
\*\*\*\*\*

Drysdale TCCCACCATGCATGGGAGGAATTAATGCATGCATATCATTAACTATCTCAACGTCTAAAC  
RAC875 TCCCACCATGCATGGAGGAAATTAATGCATGCATATCATTAACTATCTCAACGTCTAAAC  
Norin61 TCCCACCATGCATGGAGGAAATTAATGCATGCATATCATTAACTATCTCAACGTCTAAAC  
Jagger TCCCACCATGCATGGAGGAAATTAATGCATGCATATCATTAACTATCTCAACGTCTAAAC  
Mattis TCCCACCATGCATGGAGGAAATTAATGCATGCATATCATTAACTATCTCAACGTCTAAAC  
Julius TCCCACCATGCATGGAGGAAATTAATGCATGCATATCATTAACTATCTCAACGTCTAAAC  
Arina TCCCACCATGCATGGAGGAAATTAATGCATGCATATCATTAACTATCTCAACGTCTAAAC  
Spelta TCCCACCATGCATGGAGGAAATTAATGCATGCATATCATTAACTATCTCAACGTCTAAAC  
Lancer TCCCACCATGCATGGAGGAAATTAATGCATGCATATCATTAACTATCTCAACGTCTAAAC  
Gladius TCCCACCATGCATGGAGGAAATTAATGCATGCATATCATTAACTATCTCAACGTCTAAAC  
Kukri TCCCACCATGCATGGAGGAAATTAATGCATGCATATCATTAACTATCTCAACGTCTAAAC  
Landmark TCCCACCATGCATGGAGGAAATTAATGCATGCATATCATTAACTATCTCAACGTCTAAAC  
Mace TCCCACCATGCATGGAGGAAATTAATGCATGCATATCATTAACTATCTCAACGTCTAAAC  
STANLEY TCCCACCATGCATGGAGGAAATTAATGCATGCATATCATTAACTATCTCAACGTCTAAAC  
\*\*\*\*\*

v

Drysdale CGAAACAAGGCACCGCCAGATGCTGAGGGCAAGCTCGTCCAAC TACACATCCAATTGTCA  
RAC875 CGAAACAAGGCACCGCCAGATGCTGAGGGCAAGCTCGTCCAAC TACACATCCAATTGTCA  
Norin61 CGAAACAAGGCACCGCCAGATGCTGAGGGCAAGCTCGTCCAAC TACACATCCAATTGTCA  
Jagger CGAAACAAGGCACCGCCAGATGCTGAGGGCAAGCTCGTCCAAC TACACATCCAATTGTCA  
Mattis CGAAACAAGGCACCGCCAGATGCTGAGGGCAAGCTCGTCCAAC TACACATCCAATTGTCA  
Julius CGAAACAAGGCACCGCCAGATGCTGAGGGCAAGCTCGTCCAAC TACACATCCAATTGTCA  
Arina CGAAACAAGGCACCGCCAGATGCTGAGGGCAAGCTCGTCCAAC TACACATCCAATTGTCA  
Spelta CGAAACAAGGCACCGCCAGATGCTGAGGGCAAGCTCGTCCAAC TACACATCCAATTGTCA  
Lancer CGAAACAAGGCACCGCCAGATGCTGAGGGCAAGCTCGTCCAAC TACACATCCAATTGTCA  
Gladius CGAAACAAGGCACCGCCAGATGCTGAGGGCAAGCTCGTCCAAC TACACATCCAATTGTCA  
Kukri CGAAACAAGGCACCGCCAGATGCTGAGGGCAAGCTCGTCCAAC TACACATCCAATTGTCA  
Landmark CGAAACAAGGCACCGCCAGATGCTGAGGGCAAGCTCGTCCAAC TACACATCCAATTGTCA  
Mace CGAAACAAGGCACCGCCAGATGCTGAGGGCAAGCTCGTCCAAC TACACATCCAATTGTCA  
STANLEY CGAAACAAGGCACCGCCAGATGCTGAGGGCAAGCTCGTCCAAC TACACATCCAATTGTCA  
\*\*\*\*\*

Drysdale ATGTCCACCACCTCATTTATATGC-GGGCTTGAACCTAAAAAA--TTAGATACTCCCTCCGT  
 RAC875 ATGTCCACCACCTCATTTATATGC GGGCTTGAACCTAAAAAA--TTAGATACTCCCTCCGT  
 Norin61 ATGTCCACCACCTCATTTATATGC-GGGCTTGAACCTAAAAAA--TTAGATACTCCCTCCGT  
 Jagger ATGTCCACCACCTCATTTATATGC-GGGCTTGAACCTAAAAAA--TTAGATACTCCCTCCGT  
 Mattis ATGTCCACCACCTCATTTATATGC-GGGCTTGAACCTAAAAAA--TTAGATACTCCCTCCGT  
 Julius ATGTCCACCACCTCATTTATATGC-GGGCTTGAACCTAAAAAA--TTAGATACTCCCTCCGT  
 Arina ATGTCCACCACCTCATTTATATGC-GGGCTTGAACCTAAAAAA--TTAGATACTCCCTCCGT  
 Spelta ATGTCCACCACCTCATTTATATGC-GGGCTTGAACCTAAAAAA--TTAGATACTCCCTCCGT  
 Lancer ATCTCCACCACCTCATTTATATGC-GGGCTTGAACCTAAAAAA-TTAGATACTCCCTCCGT  
 Gladius ATCTCCACCACCTCATTTATATGC GGGCTTGAACCTAAAAAA-TTAGATACTCCCTCCGT  
 Kukri ATCTCCACCACCTCATTTATATGC-GGGCTTGAACCTAAAAAA-TTAGATACTCCCTCCGT  
 Landmark ATCTCCACCACCTCATTTATATGC-GGGCTTGAACCTAAAAAA-TTAGATACTCCCTCCGT  
 Mace ATCTCCACCACCTCATTTATATGC-GGGCTTGAACCTAAAAAA-TTAGATACTCCCTCCGT  
 STANLEY ATCTCCACCACCTCATTTATATGC-GGGCTTGAACCTAAAAAA-TTAGATACTCCCTCCGT  
 \*\* \*\*\*\*\*

Drysdale CTAGGTGTGTAAGTCATCTTACGAAAACCAAATAATCCCAAATAAATTAGGCGTGGTGCA  
 RAC875 CTAGGTGTGTAAGTCATCTTACGAAAACCAAATAATCCCAAATAAATTAGGCGTGGTGCA  
 Norin61 CTAGGTGTGTAAGTCATCTTACGAAAACCAAATAATCCCAAATAAATTAGGCGTGGTGCA  
 Jagger CTAGGTGTGTAAGTCATCTTACGAAAACCAAATAATCCCAAATAAATTAGGCGTGGTGCA  
 Mattis CTAGGTGTGTAAGTCATCTTACGAAAACCAAATAATCCCAAATAAATTAGGCGTGGTGCA  
 Julius CTAGGTGTGTAAGTCATCTTACGAAAACCAAATAATCCCAAATAAATTAGGCGTGGTGCA  
 Arina CTAGGTGTGTAAGTCATCTTACGAAAACCAAATAATCCCAAATAAATTAGGCGTGGTGCA  
 Spelta CTAGGTGTGTAAGTCATCTTACGAAAACCAAATAATCCCAAATAAATTAGGCGTGGTGCA  
 Lancer CTAGGTGTGTAAGTCATCTTACGAAAACCAAATAATCCCAAATAAATTAGGCGTGGTGCA  
 Gladius CTAGGTGTGTAAGTCATCTTACGAAAACCAAATAATCCCAAATAAATTAGGCGTGGTGCA  
 Kukri CTAGGTGTGTAAGTCATCTTACGAAAACCAAATAATCCCAAATAAATTAGGCGTGGTGCA  
 Landmark CTAGGTGTGTAAGTCATCTTACGAAAACCAAATAATCCCAAATAAATTAGGCGTGGTGCA  
 Mace CTAGGTGTGTAAGTCATCTTACGAAAACCAAATAATCCCAAATAAATTAGGCGTGGTGCA  
 STANLEY CTAGGTGTGTAAGTCATCTTACGAAAACCAAATAATCCCAAATAAATTAGGCGTGGTGCA  
 \*\*\*\*\*

Drysdale TTAACTTCTACCTCATTTCTTG-TTTTTGACATATCAACCAATAATAGATGAGGGTGTGC  
 RAC875 TTAACTTCTACCTCATTTCTTG-TTTTTGACATATCAACCAATAATAGATGAGGGTGTGC  
 Norin61 TTAACTTCTACCTCATTTCTTG-TTTTTGACATATCAACCAATAATAGATGAGGGTGTGC  
 Jagger TTAACTTCTACCTCATTTCTTG-TTTTTGACATATCAACCAATAATAGATGAGGGTGTGC  
 Mattis TTAACTTCTACCTCATTTCTTG-TTTTTGACATATCAACCAATAATAGATGAGGGTGTGC  
 Julius TTAACTTCTACCTCATTTCTTG-TTTTTGACATATCAACCAATAATAGATGAGGGTGTGC  
 Arina TTAACTTCTACCTCATTTCTTG-TTTTTGACATATCAACCAATAATAGATGAGGGTGTGC  
 Spelta TTAACTTCTACCTCATTTCTTG-TTTTTGACATATCAACCAATAATAGATGAGGGTGTGC  
 Lancer TTAACTTCTACCTCGTTTCTTGTTTTTGGACATATCAACCAATAATAGATGAGGGTGTGC  
 Gladius TTAACTTCTACCTCGTTTCTTGTTTTTGGACATATCAACCAATAATAGATGAGGGTGTGC  
 Kukri TTAACTTCTACCTCGTTTCTTGTTTTTGGACATATCAACCAATAATAGATGAGGGTGTGC  
 Landmark TTAACTTCTACCTCGTTTCTTGTTTTTGGACATATCAACCAATAATAGATGAGGGTGTGC  
 Mace TTAACTTCTACCTCGTTTCTTGTTTTTGGACATATCAACCAATAATAGATGAGGGTGTGC  
 STANLEY TTAACTTCTACCTCGTTTCTTGTTTTTGGACATATCAACCAATAATAGATGAGGGTGTGC  
 \*\*\*\*\*

Drysdale ATGCTTTTTAATGACTTGAGACTATTAACACGACATGCAGTGGTTAGTTCATTGCATGCA  
 RAC875 ATGCTTTTTAATGACTTGAGACTATTAACACGACATGCAGTGGTTAGTTCATTGCATGCA  
 Norin61 ATGCTTTTTAATGACTTGAGACTATTAACACGACATGCAGTGGTTAGTTCATTGCATGCA  
 Jagger ATGCTTTTTAATGACTTGAGACTATTAACACGACATGCAGTGGTTAGTTCATTGCATGCA  
 Mattis ATGCTTTTTAATGACTTGAGACTATTAACACGACATGCAGTGGTTAGTTCATTGCATGCA  
 Julius ATGCTTTTTAATGACTTGAGACTATTAACACGACATGCAGTGGTTAGTTCATTGCATGCA  
 Arina ATGCTTTTTAATGACTTGAGACTATTAACACGACATGCAGTGGTTAGTTCATTGCATGCA  
 Spelta ATGCTTTTTAATGACTTGAGACTATTAACACGACATGCAGTGGTTAGTTCATTGCATGCA  
 Lancer ATGCTTTTTAATGACTTGAGACTATTAACACGACATGCAGTGGTTAGTTCATTGCATGCA  
 Gladius ATGCTTTTTAATGACTTGAGACTATTAACACGACATGCAGTGGTTAGTTCATTGCATGCA  
 Kukri ATGCTTTTTAATGACTTGAGACTATTAACACGACATGCAGTGGTTAGTTCATTGCATGCA  
 Landmark ATGCTTTTTAATGACTTGAGACTATTAACACGACATGCAGTGGTTAGTTCATTGCATGCA  
 Mace ATGCTTTTTAATGACTTGAGACTATTAACACGACATGCAGTGGTTAGTTCATTGCATGCA  
 STANLEY ATGCTTTTTAATGACTTGAGACTATTAACACGACATGCAGTGGTTAGTTCATTGCATGCA  
 \*\*\*\*\*

Drysdale ATACTATTAATTAGCAAATAAACATTAATGTCTCTCATTTTTCCCTCCTCCTGGTCACG  
RAC875 ATACTATTAATTAGCAAATAAACATTAATGTCTCTCATTTTTCCCTCCTCCTGGTCACG  
Norin61 ATACTATTAATTAGCAAATAAACATTAATGTCTCTCATTTTTCCCTCCTCCTGGTCACG  
Jagger ATACTATTAATTAGCAAATAAACATTAATGTCTCTCATTTTTCCCTCCTCCTGGTCACG  
Mattis ATACTATTAATTAGCAAATAAACATTAATGTCTCTCATTTTTCCCTCCTCCTGGTCACG  
Julius ATACTATTAATTAGCAAATAAACATTAATGTCTCTCATTTTTCCCTCCTCCTGGTCACG  
Arina ATACTATTAATTAGCAAATAAACATTAATGTCTCTCATTTTTCCCTCCTCCTGGTCACG  
Spelta ATACTATTAATTAGCAAATAAACATTAATGTCTCTCATTTTTCCCTCCTCCTGGTCACG  
Lancer ATACTATTAATTAGCAAATAAACATTAATGTCTCTCATTTTTCCCTCCTCCTGGTCACG  
Gladius ATACTATTAATTAGCAAATAAACATTAATGTCTCTCATTTTTCCCTCCTCCTGGTCACG  
Kukri ATACTATTAATTAGCAAATAAACATTAATGTCTCTCATTTTTCCCTCCTCCTGGTCACG  
Landmark ATACTATTAATTAGCAAATAAACATTAATGTCTCTCATTTTTCCCTCCTCCTGGTCACG  
Mace ATACTATTAATTAGCAAATAAACATTAATGTCTCTCATTTTTCCCTCCTCCTGGTCACG  
STANLEY ATACTATTAATTAGCAAATAAACATTAATGTCTCTCATTTTTCCCTCCTCCTGGTCACG  
\*\*\*\*\*

v

Drysdale GTGCACAGCCTAAGATGACTTACTCACGTAGACGGAGGGAGTACTCACTTCAGATGGGAA  
RAC875 GTGCACAGCCTAAGATGACTTACTCACGTAGACGGAGGGAGTACTCACTTCAGATGGGAA  
Norin61 GTGCACAGCCTAAGATGACTTACTCACGTAGACGGAGGGAGTACTCACTTCAGATGGGAA  
Jagger GTGCACAGCCTAAGATGACTTACTCACGTAGACGGAGGGAGTACTCACTTCAGATGGGAA  
Mattis GTGCACAGCCTAAGATGACTTACTCACGTAGACGGAGGGAGTACTCACTTCAGATGGGAA  
Julius GTGCACAGCCTAAGATGACTTACTCACGTAGACGGAGGGAGTACTCACTTCAGATGGGAA  
Arina GTGCACAGCCTAAGATGACTTACTCACGTAGACGGAGGGAGTACTCACTTCAGATGGGAA  
Spelta GTGCACAGCCTAAGATGACTTACTCACGTAGACGGAGGGAGTACTCACTTCAGATGGGAA  
Lancer GTGCACAGCCTAAGATGACTTACTCACGTAGACGGAGGGAGTACTCACTTCAGATGGGAA  
Gladius GTGCACAGCCTAAGATGACTTACTCACGTAGACGGAGGGAGTACTCACTTCAGATGGGAA  
Kukri GTGCACAGCCTAAGATGACTTACTCACGTAGACGGAGGGAGTACTCACTTCAGATGGGAA  
Landmark GTGCACAGCCTAAGATGACTTACTCACGTAGACGGAGGGAGTACTCACTTCAGATGGGAA  
Mace GTGCACAGCCTAAGATGACTTACTCACGTAGACGGAGGGAGTACTCACTTCAGATGGGAA  
STANLEY GTGCACAGCCTAAGATGACTTACTCACGTAGACGGAGGGAGTACTCACTTCAGATGGGAA  
\*\*\*\*\*

v

Drysdale TACAAGTCGGGCACATTTTCTAGGTCTTCAATTTGACAAGCGAATAATATGCCACAAAAA  
RAC875 TACAAGTCGGGCACATTTTCTAGGTCTTCAATTTGACAAGCGAATAATATGCCACAAAAA  
Norin61 TACAAGTCGGGCACATTTTCTAGGTCTTCAATTTGACAAGCGAATAATATGCCACAAAAA  
Jagger TACAAGTCGGGCACATTTTCTAGGTCTTCAATTTGACAAGCGAATAATATGCCACAAAAA  
Mattis TACAAGTCGGGCACATTTTCTAGGTCTTCAATTTGACAAGCGAATAATATGCCACAAAAA  
Julius TACAAGTCGGGCACATTTTCTAGGTCTTCAATTTGACAAGCGAATAATATGCCACAAAAA  
Arina TACAAGTCGGGCACATTTTCTAGGTCTTCAATTTGACAAGCGAATAATATGCCACAAAAA  
Spelta TACAAGTCGGGCACATTTTCTAGGTCTTCAATTTGACAAGCGAATAATATGCCACAAAAA  
Lancer TACAAGTCGGGCACAGTTTCTAGGTCTTCAATTTGACAAGCGAATAATATGCCACAAAAA  
Gladius TACAAGTCGGGCACAGTTTCTAGGTCTTCAATTTGACAAGCGAATAATATGCCACAAAAA  
Kukri TACAAGTCGGGCACAGTTTCTAGGTCTTCAATTTGACAAGCGAATAATATGCCACAAAAA  
Landmark TACAAGTCGGGCACAGTTTCTAGGTCTTCAATTTGACAAGCGAATAATATGCCACAAAAA  
Mace TACAAGTCGGGCACAGTTTCTAGGTCTTCAATTTGACAAGCGAATAATATGCCACAAAAA  
STANLEY TACAAGTCGGGCACAGTTTCTAGGTCTTCAATTTGACAAGCGAATAATATGCCACAAAAA  
\*\*\*\*\*

Drysdale AATGGTAAGAAACCTCACCTGGCAAGGAATATACATTTTTTTGTGGCATATAACATATATT  
RAC875 AATGGTAAGAAACCTCACCTGGCAAGGAATATACATTTTTTTGTGGCATATAACATATATT  
Norin61 AATGGTAAGAAACCTCACCTGGCAAGGAATATACATTTTTTTGTGGCATATAACATATATT  
Jagger AATGGTAAGAAACCTCACCTGGCAAGGAATATACATTTTTTTGTGGCATATAACATATATT  
Mattis AATGGTAAGAAACCTCACCTGGCAAGGAATATACATTTTTTTGTGGCATATAACATATATT  
Julius AATGGTAAGAAACCTCACCTGGCAAGGAATATACATTTTTTTGTGGCATATAACATATATT  
Arina AATGGTAAGAAACCTCACCTGGCAAGGAATATACATTTTTTTGTGGCATATAACATATATT  
Spelta AATGGTAAGAAACCTCACCTGGCAAGGAATATACATTTTTTTGTGGCATATAACATATATT  
Lancer AATGGTAAGAAACCTCACCTGGCAAGGAATATACATTTTTTTGTGGCATATAACATATATT  
Gladius AATGGTAAGAAACCTCACCTGGCAAGGAATATACATTTTTTTGTGGCATATAACATATATT  
Kukri AATGGTAAGAAACCTCACCTGGCAAGGAATATACATTTTTTTGTGGCATATAACATATATT  
Landmark AATGGTAAGAAACCTCACCTGGCAAGGAATATACATTTTTTTGTGGCATATAACATATATT  
Mace AATGGTAAGAAACCTCACCTGGCAAGGAATATACATTTTTTTGTGGCATATAACATATATT  
STANLEY AATGGTAAGAAACCTCACCTGGCAAGGAATATACATTTTTTTGTGGCATATAACATATATT  
\*\*\*\*\*

Drysdale TTGCTTGTCAAATAGATATCCTAAAAATCGGTGTCTGTGTATATCCCACCCAAAGGGAG  
 RAC875 TTGCTTGTCAAATAGATATCCTAAAAATCGGTGTCTGTGTATATCCCACCCAAAGGGAG  
 Norin61 TTGCTTGTCAAATAGATATCCTAAAAATCGGTGTCTGTGTATATCCCACCCAAAGGGAG  
 Jagger TTGCTTGTCAAATAGATATCCTAAAAATCGGTGTCTGTGTATATCCCACCCAAAGGGAG  
 Mattis TTGCTTGTCAAATAGATATCCTAAAAATCGGTGTCTGTGTATATCCCACCCAAAGGGAG  
 Julius TTGCTTGTCAAATAGATATCCTAAAAATCGGTGTCTGTGTATATCCCACCCAAAGGGAG  
 Arina TTGCTTGTCAAATAGATATCCTAAAAATCGGTGTCTGTGTATATCCCACCCAAAGGGAG  
 Spelta TTGCTTGTCAAATAGATATCCTAAAAATCGGTGTCTGTGTATATCCCACCCAAAGGGAG  
 Lancer TTGCTTGTCAAATAGATAACCTAAAAATCGGTGTCTGTGTATATCCCACCCAAAGGGAG  
 Gladius TTGCTTGTCAAATAGATAACCTAAAAATCGGTGTCTGTGTATATCCCACCCAAAGGGAG  
 Kukri TTGCTTGTCAAATAGATAACCTAAAAATCGGTGTCTGTGTATATCCCACCCAAAGGGAG  
 Landmark TTGCTTGTCAAATAGATAACCTAAAAATCGGTGTCTGTGTATATCCCACCCAAAGGGAG  
 Mace TTGCTTGTCAAATAGATAACCTAAAAATCGGTGTCTGTGTATATCCCACCCAAAGGGAG  
 STANLEY TTGCTTGTCAAATAGATAACCTAAAAATCGGTGTCTGTGTATATCCCACCCAAAGGGAG  
 \*\*\*\*\*

Drysdale TAACAATTAGGAATTAAGAGAGCTTTTATTATGGTAGACCCTTCTTTCATTAAGATACCC  
 RAC875 TAACAATTAGGAATTAAGAGAGCTTTTATTATGGTAGACCCTTCTTTCATTAAGATACCC  
 Norin61 TAACAATTAGGAATTAAGAGAGCTTTTATTATGGTAGACCCTTCTTTCATTAAGATACCC  
 Jagger TAACAATTAGGAATTAAGAGAGCTTTTATTATGGTAGACCCTTCTTTCATTAAGATACCC  
 Mattis TAACAATTAGGAATTAAGAGAGCTTTTATTATGGTAGACCCTTCTTTCATTAAGATACCC  
 Julius TAACAATTAGGAATTAAGAGAGCTTTTATTATGGTAGACCCTTCTTTCATTAAGATACCC  
 Arina TAACAATTAGGAATTAAGAGAGCTTTTATTATGGTAGACCCTTCTTTCATTAAGATACCC  
 Spelta TAACAATTAGGAATTAAGAGAGCTTTTATTATGGTAGACCCTTCTTTCATTAAGATACCC  
 Lancer TAACAATTAGGAATTAAGAGAGCTTTTATTATGGTAGACCCTTCTTTCATTAAGATACCC  
 Gladius TAACAATTAGGAATTAAGAGAGCTTTTATTATGGTAGACCCTTCTTTCATTAAGATACCC  
 Kukri TAACAATTAGGAATTAAGAGAGCTTTTATTATGGTAGACCCTTCTTTCATTAAGATACCC  
 Landmark TAACAATTAGGAATTAAGAGAGCTTTTATTATGGTAGACCCTTCTTTCATTAAGATACCC  
 Mace TAACAATTAGGAATTAAGAGAGCTTTTATTATGGTAGACCCTTCTTTCATTAAGATACCC  
 STANLEY TAACAATTAGGAATTAAGAGAGCTTTTATTATGGTAGACCCTTCTTTCATTAAGATACCC  
 \*\*\*\*\*

Drysdale ACGTCTAAGGACATCATCAATGTATCATTCTTAAGTCGGTAATTAGCTGGGGCCACACTA  
 RAC875 ACGTCTAAGGACATCATCAATGTATCATTCTTAAGTCGGTAATTAGCTGGGGCCACACTA  
 Norin61 ACGTCTAAGGACATCATCAATGTATCATTCTTAAGTCGGTAATTAGCTGGGGCCACACTA  
 Jagger ACGTCTAAGGACATCATCAATGTATCATTCTTAAGTCGGTAATTAGCTGGGGCCACACTA  
 Mattis ACGTCTAAGGACATCATCAATGTATCATTCTTAAGTCGGTAATTAGCTGGGGCCACACTA  
 Julius ACGTCTAAGGACATCATCAATGTATCATTCTTAAGTCGGTAATTAGCTGGGGCCACACTA  
 Arina ACGTCTAAGGACATCATCAATGTATCATTCTTAAGTCGGTAATTAGCTGGGGCCACACTA  
 Spelta ACGTCTAAGGACATCATCAATGTATCATTCTTAAGTCGGTAATTAGCTGGGGCCACACTA  
 Lancer ACGTCTAAGGACATCATCAATGTATCATTCTTAAGTCGGTAATTAGCTGGGGCCACACTA  
 Gladius ACGTCTAAGGACATCATCAATGTATCATTCTTAAGTCGGTAATTAGCTGGGGCCACACTA  
 Kukri ACGTCTAAGGACATCATCAATGTATCATTCTTAAGTCGGTAATTAGCTGGGGCCACACTA  
 Landmark ACGTCTAAGGACATCATCAATGTATCATTCTTAAGTCGGTAATTAGCTGGGGCCACACTA  
 Mace ACGTCTAAGGACATCATCAATGTATCATTCTTAAGTCGGTAATTAGCTGGGGCCACACTA  
 STANLEY ACGTCTAAGGACATCATCAATGTATCATTCTTAAGTCGGTAATTAGCTGGGGCCACACTA  
 \*\*\*\*\*

Drysdale TGCTATAGCAAACCTCGAATTCCTCCTATGCTTAATTCCAATATGGCTATGGACGTTAGGG  
 RAC875 TGCTATAGCAAACCTCGAATTCCTCCTATGCTTAATTCCAATATGGCTATGGACGTTAGGG  
 Norin61 TGCTATAGCAAACCTCGAATTCCTCCTATGCTTAATTCCAATATGGCTATGGACGTTAGGG  
 Jagger TGCTATAGCAAACCTCGAATTCCTCCTATGCTTAATTCCAATATGGCTATGGACGTTAGGG  
 Mattis TGCTATAGCAAACCTCGAATTCCTCCTATGCTTAATTCCAATATGGCTATGGACGTTAGGG  
 Julius TGCTATAGCAAACCTCGAATTCCTCCTATGCTTAATTCCAATATGGCTATGGACGTTAGGG  
 Arina TGCTATAGCAAACCTCGAATTCCTCCTATGCTTAATTCCAATATGGCTATGGACGTTAGGG  
 Spelta TGCTATAGCAAACCTCGAATTCCTCCTATGCTTAATTCCAATATGGCTATGGACGTTAGGG  
 Lancer TGCTATAGCAAACCTCGAATTCCTCCTATGCTTAATTCCAATATGGCTATGGACGTTAGGG  
 Gladius TGCTATAGCAAACCTCGAATTCCTCCTATGCTTAATTCCAATATGGCTATGGACGTTAGGG  
 Kukri TGCTATAGCAAACCTCGAATTCCTCCTATGCTTAATTCCAATATGGCTATGGACGTTAGGG  
 Landmark TGCTATAGCAAACCTCGAATTCCTCCTATGCTTAATTCCAATATGGCTATGGACGTTAGGG  
 Mace TGCTATAGCAAACCTCGAATTCCTCCTATGCTTAATTCCAATATGGCTATGGACGTTAGGG  
 STANLEY TGCTATAGCAAACCTCGAATTCCTCCTATGCTTAATTCCAATATGGCTATGGACGTTAGGG  
 \*\*\*\*\*

Drysdale TGAAGCCCACCTTGCCGGTATTTTCTCTTGTAGTTTTAACCCCTCAAATCATGTGAGGGGA  
RAC875 TGAAGCCCACCTTGCCGGTATTTTCTCTTGTAGTTTTAACCCCTCAAATCATGTGAGGGGA  
Norin61 TGAAGCCCACCTTGCCGGTATTTTCTCTTGTAGTTTTAACCCCTCAAATCATGTGAGGGGA  
Jagger TGAAGCCCACCTTGCCGGTATTTTCTCTTGTAGTTTTAACCCCTCAAATCATGTGAGGGGA  
Mattis TGAAGCCCACCTTGCCGGTATTTTCTCTTGTAGTTTTAACCCCTCAAATCATGTGAGGGGA  
Julius TGAAGCCCACCTTGCCGGTATTTTCTCTTGTAGTTTTAACCCCTCAAATCATGTGAGGGGA  
Arina TGAAGCCCACCTTGCCGGTATTTTCTCTTGTAGTTTTAACCCCTCAAATCATGTGAGGGGA  
Spelta TGAAGCCCACCTTGCCGGTATTTTCTCTTGTAGTTTTAACCCCTCAAATCATGTGAGGGGA  
Lancer TGAAGCCCACCTTGCCGGTATTTTCTCTTGTAGTTTTAACCCCTCAAATCATGTGAGGGGA  
Gladius TGAAGCCCACCTTGCCGGTATTTTCTCTTGTAGTTTTAACCCCTCAAATCATGTGAGGGGA  
Kukri TGAAGCCCACCTTGCCGGTATTTTCTCTTGTAGTTTTAACCCCTCAAATCATGTGAGGGGA  
Landmark TGAAGCCCACCTTGCCGGTATTTTCTCTTGTAGTTTTAACCCCTCAAATCATGTGAGGGGA  
Mace TGAAGCCCACCTTGCCGGTATTTTCTCTTGTAGTTTTAACCCCTCAAATCATGTGAGGGGA  
STANLEY TGAAGCCCACCTTGCCGGTATTTTCTCTTGTAGTTTTAACCCCTCAAATCATGTGAGGGGA  
\*\*\*\*\*

Drysdale GAAAGAAATAGTTTTTGATTCCCTTGTGGCATGGCCTTAGCACTATGACCGGTCCTTAAAGA  
RAC875 GAAAGAAATAGTTTTTGATTCCCTTGTGGCATGGCCTTAGCACTATGACCGGTCCTTAAAGA  
Norin61 GAAAGAAATAGTTTTTGATTCCCTTGTGGCATGGCCTTAGCACTATGACCGGTCCTTAAAGA  
Jagger GAAAGAAATAGTTTTTGATTCCCTTGTGGCATGGCCTTAGCACTATGACCGGTCCTTAAAGA  
Mattis GAAAGAAATAGTTTTTGATTCCCTTGTGGCATGGCCTTAGCACTATGACCGGTCCTTAAAGA  
Julius GAAAGAAATAGTTTTTGATTCCCTTGTGGCATGGCCTTAGCACTATGACCGGTCCTTAAAGA  
Arina GAAAGAAATAGTTTTTGATTCCCTTGTGGCATGGCCTTAGCACTATGACCGGTCCTTAAAGA  
Spelta GAAAGAAATAGTTTTTGATTCCCTTGTGGCATGGCCTTAGCACTATGACCGGTCCTTAAAGA  
Lancer GAAAGAAATAGTTTTTGATTCCCTTGTGGCATGGCCTTAGCACTATGACCGGTCCTTAAAGA  
Gladius GAAAGAAATAGTTTTTGATTCCCTTGTGGCATGGCCTTAGCACTATGACCGGTCCTTAAAGA  
Kukri GAAAGAAATAGTTTTTGATTCCCTTGTGGCATGGCCTTAGCACTATGACCGGTCCTTAAAGA  
Landmark GAAAGAAATAGTTTTTGATTCCCTTGTGGCATGGCCTTAGCACTATGACCGGTCCTTAAAGA  
Mace GAAAGAAATAGTTTTTGATTCCCTTGTGGCATGGCCTTAGCACTATGACCGGTCCTTAAAGA  
STANLEY GAAAGAAATAGTTTTTGATTCCCTTGTGGCATGGCCTTAGCACTATGACCGGTCCTTAAAGA  
\*\*\*\*\*

Drysdale TTTTGTGTTGCTAGGACCCCTTCCCACAATGCTTGAGGATATGTCATTAGACCCATATTTT  
RAC875 TTTTGTGTTGCTAGGACCCCTTCCCACAATGCTTGAGGATATGTCATTAGACCCATATTTT  
Norin61 TTTTGTGTTGCTAGGACCCCTTCCCACAATGCTTGAGGATATGTCATTAGACCCATATTTT  
Jagger TTTTGTGTTGCTAGGACCCCTTCCCACAATGCTTGAGGATATGTCATTAGACCCATATTTT  
Mattis TTTTGTGTTGCTAGGACCCCTTCCCACAATGCTTGAGGATATGTCATTAGACCCATATTTT  
Julius TTTTGTGTTGCTAGGACCCCTTCCCACAATGCTTGAGGATATGTCATTAGACCCATATTTT  
Arina TTTTGTGTTGCTAGGACCCCTTCCCACAATGCTTGAGGATATGTCATTAGACCCATATTTT  
Spelta TTTTGTGTTGCTAGGACCCCTTCCCACAATGCTTGAGGATATGTCATTAGACCCATATTTT  
Lancer TTTTGTGTTGCTAGGACCCCTTCCCACAATGCTTGAGGATATGTCATTAGACCCATATTTT  
Gladius TTTTGTGTTGCTAGGACCCCTTCCCACAATGCTTGAGGATATGTCATTAGACCCATATTTT  
Kukri TTTTGTGTTGCTAGGACCCCTTCCCACAATGCTTGAGGATATGTCATTAGACCCATATTTT  
Landmark TTTTGTGTTGCTAGGACCCCTTCCCACAATGCTTGAGGATATGTCATTAGACCCATATTTT  
Mace TTTTGTGTTGCTAGGACCCCTTCCCACAATGCTTGAGGATATGTCATTAGACCCATATTTT  
STANLEY TTTTGTGTTGCTAGGACCCCTTCCCACAATGCTTGAGGATATGTCATTAGACCCATATTTT  
\*\*\*\*\*

Drysdale TGCAACAATGGAGACATAATATAAGATTTGATGATATATAGGTTATATTTTCATTAGAGAT  
RAC875 TGCAACAATGGAGACATAATATAAGATTTGATGATATATAGGTTATATTTTCATTAGAGAT  
Norin61 TGCAACAATGGAGACATAATATAAGATTTGATGATATATAGGTTATATTTTCATTAGAGAT  
Jagger TGCAACAATGGAGACATAATATAAGATTTGATGATATATAGGTTATATTTTCATTAGAGAT  
Mattis TGCAACAATGGAGACATAATATAAGATTTGATGATATATAGGTTATATTTTCATTAGAGAT  
Julius TGCAACAATGGAGACATAATATAAGATTTGATGATATATAGGTTATATTTTCATTAGAGAT  
Arina TGCAACAATGGAGACATAATATAAGATTTGATGATATATAGGTTATATTTTCATTAGAGAT  
Spelta TGCAACAATGGAGACATAATATAAGATTTGATGATATATAGGTTATATTTTCATTAGAGAT  
Lancer TGCAACAATGGAGACATAATATAAGATTTGATGATATATAGGTTATATTTTCATTAGAGAT  
Gladius TGCAACAATGGAGACATAATATAAGATTTGATGATATATAGGTTATATTTTCATTAGAGAT  
Kukri TGCAACAATGGAGACATAATATAAGATTTGATGATATATAGGTTATATTTTCATTAGAGAT  
Landmark TGCAACAATGGAGACATAATATAAGATTTGATGATATATAGGTTATATTTTCATTAGAGAT  
Mace TGCAACAATGGAGACATAATATAAGATTTGATGATATATAGGTTATATTTTCATTAGAGAT  
STANLEY TGCAACAATGGAGACATAATATAAGATTTGATGATATATAGGTTATATTTTCATTAGAGAT  
\*\*\*\*\*



Drysdale GATCTCTTAGGCCTGTCTCGATGGATATTATCATAAACTATTATCATTAAATGATGCTAC  
RAC875 GATCTCTTAGGCCTGTCTCGATGGATATTATCATAAACTATTATCATTAAATGATGCTAC  
Norin61 GATCTCTTAGGCCTGTCTCGATGGATATTATCATAAACTATTATCATTAAATGATGCTAC  
Jagger GATCTCTTAGGCCTGTCTCGATGGATATTATCATAAACTATTATCATTAAATGATGCTAC  
Mattis GATCTCTTAGGCCTGTCTCGATGGATATTATCATAAACTATTATCATTAAATGATGCTAC  
Julius GATCTCTTAGGCCTGTCTCGATGGATATTATCATAAACTATTATCATTAAATGATGCTAC  
Arina GATCTCTTAGGCCTGTCTCGATGGATATTATCATAAACTATTATCATTAAATGATGCTAC  
Spelta GATCTCTTAGGCCTGTCTCGATGGATATTATCATAAACTATTATCATTAAATGATGCTAC  
Lancer GATCTCTTAGGCCTGTCTCGATGGATACTATCATAAACTATTATCATTAAATGATGCTAC  
Gladius GATCTCTTAGGCCTGTCTCGATGGATATTATCATAAACTATTATCATTAAATGATGCTAC  
Kukri GATCTCTTAGGCCTGTCTCGATGGATATTATCATAAACTATTATCATTAAATGATGCTAC  
Landmark GATCTCTTAGGCCTGTCTCGATGGATATTATCATAAACTATTATCATTAAATGATGCTAC  
Mace GATCTCTTAGGCCTGTCTCGATGGATATTATCATAAACTATTATCATTAAATGATGCTAC  
STANLEY GATCTCTTAGGCCTGTCTCGATGGATATTATCATAAACTATTATCATTAAATGATGCTAC  
\*\*\*\*\*

Drysdale TTTGCTTACTACATTCCCATCATTTTCATAGCATCATAACATATATTTTACTGGGAATAAA  
RAC875 TTTGCTTACTACATTCCCATCATTTTCATAGCATCATAACATATATTTTACTGGGAATAAA  
Norin61 TTTGCTTACTACATTCCCATCATTTTCATAGCATCATAACATATATTTTACTGGGAATAAA  
Jagger TTTGCTTACTACATTCCCATCATTTTCATAGCATCATAACATATATTTTACTGGGAATAAA  
Mattis TTTGCTTACTACATTCCCATCATTTTCATAGCATCATAACATATATTTTACTGGGAATAAA  
Julius TTTGCTTACTACATTCCCATCATTTTCATAGCATCATAACATATATTTTACTGGGAATAAA  
Arina TTTGCTTACTACATTCCCATCATTTTCATAGCATCATAACATATATTTTACTGGGAATAAA  
Spelta TTTGCTTACTACATTCCCATCATTTTCATAGCATCATAACATATATTTTACTGGGAATAAA  
Lancer TTTGCTTACTACATTCCCATCATTTTCATAGCATCATAACATATATTTTACTGGGAATAAA  
Gladius TTTGCTTACTACATTCCCATCATTTTCATAGCATCATAACATATATTTTACTGGGAATAAA  
Kukri TTTGCTTACTACATTCCCATCATTTTCATAGCATCATAACATATATTTTACTGGGAATAAA  
Landmark TTTGCTTACTACATTCCCATCATTTTCATAGCATCATAACATATATTTTACTGGGAATAAA  
Mace TTTGCTTACTACATTCCCATCATTTTCATAGCATCATAACATATATTTTACTGGGAATAAA  
STANLEY TTTGCTTACTACATTCCCATCATTTTCATAGCATCATAACATATATTTTACTGGGAATAAA  
\*\*\*\*\*

Drysdale CTTATATTTTATAACTTAAAATTATTATCAAAATGTGACAAAATACAAGAGGACTAGTGA  
RAC875 CTTATATTTTATAACTTAAAATTATTATCAAAATGTGACAAAATACAAGAGGACTAGTGA  
Norin61 CTTATATTTTATAACTTAAAATTATTATCAAAATGTGACAAAATACAAGAGGACTAGTGA  
Jagger CTTATATTTTATAACTTAAAATTATTATCAAAATGTGACAAAATACAAGAGGACTAGTGA  
Mattis CTTATATTTTATAACTTAAAATTATTATCAAAATGTGACAAAATACAAGAGGACTAGTGA  
Julius CTTATATTTTATAACTTAAAATTATTATCAAAATGTGACAAAATACAAGAGGACTAGTGA  
Arina CTTATATTTTATAACTTAAAATTATTATCAAAATGTGACAAAATACAAGAGGACTAGTGA  
Spelta CTTATATTTTATAACTTAAAATTATTATCAAAATGTGACAAAATACAAGAGGACTAGTGA  
Lancer CTTATATTTTATAACTTAAAATTATTATCAAAATGTGACAAAATACAAGAGGACTAGTGA  
Gladius CTTATATTTTATAACTTAAAATTATTATCAAAATGTGACAAAATACAAGAGGACTAGTGA  
Kukri CTTATATTTTATAACTTAAAATTATTATCAAAATGTGACAAAATACAAGAGGACTAGTGA  
Landmark CTTATATTTTATAACTTAAAATTATTATCAAAATGTGACAAAATACAAGAGGACTAGTGA  
Mace CTTATATTTTATAACTTAAAATTATTATCAAAATGTGACAAAATACAAGAGGACTAGTGA  
STANLEY CTTATATTTTATAACTTAAAATTATTATCAAAATGTGACAAAATACAAGAGGACTAGTGA  
\*\*\*\*\*

Drysdale ATCAGGACGGAGGCGGTAGGAAAAGAGACAGTGTACGGTGGAGCATCGGGAGAGAGAGT  
RAC875 ATCAGGACGGAGGCGGTAGGAAAAGAGACAGTGTACGGTGGAGCATCGGGAGAGAGAGT  
Norin61 ATCAGGACGGAGGCGGTAGGAAAAGAGACAGTGTACGGTGGAGCATCGGGAGAGAGAGT  
Jagger ATCAGGACGGAGGCGGTAGGAAAAGAGACAGTGTACGGTGGAGCATCGGGAGAGAGAGT  
Mattis ATCAGGACGGAGGCGGTAGGAAAAGAGACAGTGTACGGTGGAGCATCGGGAGAGAGAGT  
Julius ATCAGGACGGAGGCGGTAGGAAAAGAGACAGTGTACGGTGGAGCATCGGGAGAGAGAGT  
Arina ATCAGGACGGAGGCGGTAGGAAAAGAGACAGTGTACGGTGGAGCATCGGGAGAGAGAGT  
Spelta ATCAGGACGGAGGCGGTAGGAAAAGAGACAGTGTACGGTGGAGCATCGGGAGAGAGAGT  
Lancer ATCAGGACGGAGGCGGTAGGAAAAGAGACAGTGTACGGTGGAGCATCGGGAGAGAGAGT  
Gladius ATCAGGACGGAGGCGGTAGGAAAAGAGACAGTGTACGGTGGAGCATCGGGAGAGAGAGT  
Kukri ATCAGGACGGAGGCGGTAGGAAAAGAGACAGTGTACGGTGGAGCATCGGGAGAGAGAGT  
Landmark ATCAGGACGGAGGCGGTAGGAAAAGAGACAGTGTACGGTGGAGCATCGGGAGAGAGAGT  
Mace ATCAGGACGGAGGCGGTAGGAAAAGAGACAGTGTACGGTGGAGCATCGGGAGAGAGAGT  
STANLEY ATCAGGACGGAGGCGGTAGGAAAAGAGACAGTGTACGGTGGAGCATCGGGAGAGAGAGT  
\*\*\*\*\*

v

Drysdale CCCAACAGTAAAAAGCCAAACTCACTGAAAAGTAGTGATTA AAAAGAAGATTCACATGCC  
RAC875 CCCAACAGTAAAAAGCCAAACTCACTGAAAAGTAGTGATTA AAAAGAAGATTCACATGCC  
Norin61 CCCAACAGTAAAAAGCCAAACTCACTGAAAAGTAGTGATTA AAAAGAAGATTCACATGCC  
Jagger CCCAACAGTAAAAAGCCAAACTCACTGAAAAGTAGTGATTA AAAAGAAGATTCACATGCC  
Mattis CCCAACAGTAAAAAGCCAAACTCACTGAAAAGTAGTGATTA AAAAGAAGATTCACATGCC  
Julius CCCAACAGTAAAAAGCCAAACTCACTGAAAAGTAGTGATTA AAAAGAAGATTCACATGCC  
Arina CCCAACAGTAAAAAGCCAAACTCACTGAAAAGTAGTGATTA AAAAGAAGATTCACATGCC  
Spelta CCCAACAGTAAAAAGCCAAACTCACTGAAAAGTAGTGATTA AAAAGAAGATTCACATGCC  
Lancer CCCAACAGTAAAAAGCCAAACTCACTGAAAAGTAGTGATTA AAAAGAAGATTCACATGCC  
Gladius CCCAACAGTAAAAAGCCAAACTCACTGAAAAGTAGTGATTA AAAAGAAGATTCACATGCC  
Kukri CCCAACAGTAAAAAGCCAAACTCACTGAAAAGTAGTGATTA AAAAGAAGATTCACATGCC  
Landmark CCCAACAGTAAAAAGCCAAACTCACTGAAAAGTAGTGATTA AAAAGAAGATTCACATGCC  
Mace CCCAACAGTAAAAAGCCAAACTCACTGAAAAGTAGTGATTA AAAAGAAGATTCACATGCC  
STANLEY CCCAACAGTAAAAAGCCAAACTCACTGAAAAGTAGTGATTA AAAAGAAGATTCACATGCC  
\*\*\*\*\*

Drysdale CACTTGCAGTACTACCAAGCAAAAACACAAGGCCAATCGACCAGTAATGTATAATTA AAA  
RAC875 CACTTGCAGTACTACCAAGCAAAAACACAAGGCCAATCGACCAGTAATGTATAATTA AAA  
Norin61 CACTTGCAGTACTACCAAGCAAAAACACAAGGCCAATCGACCAGTAATGTATAATTA AAA  
Jagger CACTTGCAGTACTACCAAGCAAAAACACAAGGCCAATCGACCAGTAATGTATAATTA AAA  
Mattis CACTTGCAGTACTACCAAGCAAAAACACAAGGCCAATCGACCAGTAATGTATAATTA AAA  
Julius CACTTGCAGTACTACCAAGCAAAAACACAAGGCCAATCGACCAGTAATGTATAATTA AAA  
Arina CACTTGCAGTACTACCAAGCAAAAACACAAGGCCAATCGACCAGTAATGTATAATTA AAA  
Spelta CACTTGCAGTACTACCAAGCAAAAACACAAGGCCAATCGACCAGTAATGTATAATTA AAA  
Lancer CACTTGCAGTACTACCAAGCAAAAACACAAGGCCAATCGACCAGTAATGTATAATTA AAA  
Gladius CACTTGCAGTACTACCAAGCAAAAACACAAGGCCAATCGACCAGTAATGTATAATTA AAA  
Kukri CACTTGCAGTACTACCAAGCAAAAACACAAGGCCAATCGACCAGTAATGTATAATTA AAA  
Landmark CACTTGCAGTACTACCAAGCAAAAACACAAGGCCAATCGACCAGTAATGTATAATTA AAA  
Mace CACTTGCAGTACTACCAAGCAAAAACACAAGGCCAATCGACCAGTAATGTATAATTA AAA  
STANLEY CACTTGCAGTACTACCAAGCAAAAACACAAGGCCAATCGACCAGTAATGTATAATTA AAA  
\*\*\*\*\*

Drysdale ACATTGTCACGGTCCCCAGTTGAAATTTTTGGGT CATGGTGTTC AACAGAGTTATTTA  
RAC875 ACATTGTCACGGTCCCCAGTTGAAATTTTTGGGT CATGGTGTTC AACAGAGTTATTTA  
Norin61 ACATTGTCACGGTCCCCAGTTGAAATTTTTGGGT CATGGTGTTC AACAGAGTTATTTA  
Jagger ACATTGTCACGGTCCCCAGTTGAAATTTTTGGGT CATGGTGTTC AACAGAGTTATTTA  
Mattis ACATTGTCACGGTCCCCAGTTGAAATTTTTGGGT CATGGTGTTC AACAGAGTTATTTA  
Julius ACATTGTCACGGTCCCCAGTTGAAATTTTTGGGT CATGGTGTTC AACAGAGTTATTTA  
Arina ACATTGTCACGGTCCCCAGTTGAAATTTTTGGGT CATGGTGTTC AACAGAGTTATTTA  
Spelta ACATTGTCACGGTCCCCAGTTGAAATTTTTGGGT CATGGTGTTC AACAGAGTTATTTA  
Lancer ACATTGTCACGGTCCCCAGTTGAAATTTTTGGGT CATGGTGTTC AACAGAGTTATTTA  
Gladius ACATTGTCACGGTCCCCAGTTGAAATTTTTGGGT CATGGTGTTC AACAGAGTTATTTA  
Kukri ACATTGTCACGGTCCCCAGTTGAAATTTTTGGGT CATGGTGTTC AACAGAGTTATTTA  
Landmark ACATTGTCACGGTCCCCAGTTGAAATTTTTGGGT CATGGTGTTC AACAGAGTTATTTA  
Mace ACATTGTCACGGTCCCCAGTTGAAATTTTTGGGT CATGGTGTTC AACAGAGTTATTTA  
STANLEY ACATTGTCACGGTCCCCAGTTGAAATTTTTGGGT CATGGTGTTC AACAGAGTTATTTA  
\*\*\*\*\*

Drysdale ATGTTCTACTAGAGGGCATTAAATGTGACATATCGTAGTTTAAATCGCGGTGGCGTG GCAAT  
RAC875 ATGTTCTACTAGAGGGCATTAAATGTGACATATCGTAGTTTAAATCGCGGTGGCGTG GCAAT  
Norin61 ATGTTCTACTAGAGGGCATTAAATGTGACATATCGTAGTTTAAATCGCGGTGGCGTG GCAAT  
Jagger ATGTTCTACTAGAGGGCATTAAATGTGACATATCGTAGTTTAAATCGCGGTGGCGTG GCAAT  
Mattis ATGTTCTACTAGAGGGCATTAAATGTGACATATCGTAGTTTAAATCGCGGTGGCGTG GCAAT  
Julius ATGTTCTACTAGAGGGCATTAAATGTGACATATCGTAGTTTAAATCGCGGTGGCGTG GCAAT  
Arina ATGTTCTACTAGAGGGCATTAAATGTGACATATCGTAGTTTAAATCGCGGTGGCGTG GCAAT  
Spelta ATGTTCTACTAGAGGGCATTAAATGTGACATATCGTAGTTTAAATCGCGGTGGCGTG GCAAT  
Lancer ATGTTCTACTAGAGGGCATTAAATGTGACATATCGTAGTTTAAATCGCGGTGGCGTG GCAAT  
Gladius ATGTTCTACTAGAGGGCATTAAATGTGACATATCGTAGTTTAAATCGCGGTGGCGTG GCAAT  
Kukri ATGTTCTACTAGAGGGCATTAAATGTGACATATCGTAGTTTAAATCGCGGTGGCGTG GCAAT  
Landmark ATGTTCTACTAGAGGGCATTAAATGTGACATATCGTAGTTTAAATCGCGGTGGCGTG GCAAT  
Mace ATGTTCTACTAGAGGGCATTAAATGTGACATATCGTAGTTTAAATCGCGGTGGCGTG GCAAT  
STANLEY ATGTTCTACTAGAGGGCATTAAATGTGACATATCGTAGTTTAAATCGCGGTGGCGTG GCAAT  
\*\*\*\*\*

Drysdale GACATTGGCAAGCAAACCTAAACTAGCTGAGTGTCTTGTCCCTCTCCACCCACCCTAGTC  
RAC875 GACATTGGCAAGCAAACCTAAACTAGCTGAGTGTCTTGTCCCTCTCCACCCACCCTAGTC  
Norin61 GACATTGGCAAGCAAACCTAAACTAGCTGAGTGTCTTGTCCCTCTCCACCCACCCTAGTC  
Jagger GACATTGGCAAGCAAACCTAAACTAGCTGAGTGTCTTGTCCCTCTCCACCCACCCTAGTC  
Mattis GACATTGGCAAGCAAACCTAAACTAGCTGAGTGTCTTGTCCCTCTCCACCCACCCTAGTC  
Julius GACATTGGCAAGCAAACCTAAACTAGCTGAGTGTCTTGTCCCTCTCCACCCACCCTAGTC  
Arina GACATTGGCAAGCAAACCTAAACTAGCTGAGTGTCTTGTCCCTCTCCACCCACCCTAGTC  
Spelta GACATTGGCAAGCAAACCTAAACTAGCTGAGTGTCTTGTCCCTCTCCACCCACCCTAGTC  
Lancer GACATTGGCAAGCAAACCTAAACTAGCTGAGTGTCTTGTCCCTCTCCACCCACCCTAGTC  
Gladius GACATTGGCAAGCAAACCTAAACTAGCTGAGTGTCTTGTCCCTCTCCACCCACCCTAGTC  
Kukri GACATTGGCAAGCAAACCTAAACTAGCTGAGTGTCTTGTCCCTCTCCACCCACCCTAGTC  
Landmark GACATTGGCAAGCAAACCTAAACTAGCTGAGTGTCTTGTCCCTCTCCACCCACCCTAGTC  
Mace GACATTGGCAAGCAAACCTAAACTAGCTGAGTGTCTTGTCCCTCTCCACCCACCCTAGTC  
STANLEY GACATTGGCAAGCAAACCTAAACTAGCTGAGTGTCTTGTCCCTCTCCACCCACCCTAGTC  
\*\*\*\*\*

v

Drysdale AAGCCTAATTAGCTAAGCTGCGTTGGAAAGGGCTAAAAGTGAGTCTCTCTGGACCTGGAA  
RAC875 AAGCCTAATTAGCTAAGCTGCGTTGGAAAGGGCTAAAAGTGAGTCTCTCTGGACCTGGAA  
Norin61 AAGCCTAATTAGCTAAGCTGCGTTGGAAAGGGCTAAAAGTGAGTCTCTCTGGACCTGGAA  
Jagger AAGCCTAATTAGCTAAGCTGCGTTGGAAAGGGCTAAAAGTGAGTCTCTCTGGACCTGGAA  
Mattis AAGCCTAATTAGCTAAGCTGCGTTGGAAAGGGCTAAAAGTGAGTCTCTCTGGACCTGGAA  
Julius AAGCCTAATTAGCTAAGCTGCGTTGGAAAGGGCTAAAAGTGAGTCTCTCTGGACCTGGAA  
Arina AAGCCTAATTAGCTAAGCTGCGTTGGAAAGGGCTAAAAGTGAGTCTCTCTGGACCTGGAA  
Spelta AAGCCTAATTAGCTAAGCTGCGTTGGAAAGGGCTAAAAGTGAGTCTCTCTGGACCTGGAA  
Lancer AAGCCTAATTAGCTAAGCTGCGTTGGAGAGGGCTAAAAGTGAGTCTCTCTGGACCTGGAA  
Gladius AAGCCTAATTAGCTAAGCTGCGTTGGAGAGGGCTAAAAGTGAGTCTCTCTGGACCTGGAA  
Kukri AAGCCTAATTAGCTAAGCTGCGTTGGAGAGGGCTAAAAGTGAGTCTCTCTGGACCTGGAA  
Landmark AAGCCTAATTAGCTAAGCTGCGTTGGAGAGGGCTAAAAGTGAGTCTCTCTGGACCTGGAA  
Mace AAGCCTAATTAGCTAAGCTGCGTTGGAGAGGGCTAAAAGTGAGTCTCTCTGGACCTGGAA  
STANLEY AAGCCTAATTAGCTAAGCTGCGTTGGAGAGGGCTAAAAGTGAGTCTCTCTGGACCTGGAA  
\*\*\*\*\*

-2241

v v

Drysdale TCCAAACATTCAAAAACGA-TTTGGTGAGAGCATCTCCAGTCGCACCCCTCAACACGGCCT  
RAC875 TCCAAACATTCAAAAACGA-TTTGGTGAGAGCATCTCCAGTCGCACCCCTCAACACGGCCT  
Norin61 TCCAAACATTCAAAAACGA-TTTGGTGAGAGCATCTCCAGTCGCACCCCTCAACACGGCCT  
Jagger TCCAAACATTCAAAAACGA-TTTGGTGAGAGCATCTCCAGTCGCACCCCTCAACACGGCCT  
Mattis TCCAAACATTCAAAAACGA-TTTGGTGAGAGCATCTCCAGTCGCACCCCTCAACACGGCCT  
Julius TCCAAACATTCAAAAACGA-TTTGGTGAGAGCATCTCCAGTCGCACCCCTCAACACGGCCT  
Arina TCCAAACATTCAAAAACGA-TTTGGTGAGAGCATCTCCAGTCGCACCCCTCAACACGGCCT  
Spelta TCCAAACATTCAAAAACGA-TTTGGTGAGAGCATCTCCAGTCGCACCCCTCAACACGGCCT  
Lancer TCCAAACATTCAAAAACGA-TTTGGTGAGAGCATCTCCAGTCGCATCCCAACACGGCCT  
Gladius TCCAAACATTCAAAAACGA-TTTGGTGAGAGCATCTCCAGTCGCATCCCAACACGGCCT  
Kukri TCCAAACATTCAAAAACGA-TTTGGTGAGAGCATCTCCAGTCGCATCCCAACACGGCCT  
Landmark TCCAAACATTCAAAAACGA-TTTGGTGAGAGCATCTCCAGTCGCATCCCAACACGGCCT  
Mace TCCAAACATTCAAAAACGA-TTTGGTGAGAGCATCTCCAGTCGCATCCCAACACGGCCT  
STANLEY TCCAAACATTCAAAAACGA-TTTGGTGAGAGCATCTCCAGTCGCATCCCAACACGGCCT  
\*\*\*\*\*

v

Drysdale TTCTGGCGATTTTTTCGTGCCGGCGCCTAAAAATGGCCCAGTCGCGTCCCCAGGAGCCCG  
RAC875 TTCTGGCGATTTTTTCGTGCCGGCGCCTAAAAATGGCCCAGTCGCGTCCCCAGGAGCCCG  
Norin61 TTCTGGCGATTTTTTCGTGCCGGCGCCTAAAAATGGCCCAGTCGCGTCCCCAGGAGCCCG  
Jagger TTCTGGCGATTTTTTCGTGCCGGCGCCTAAAAATGGCCCAGTCGCGTCCCCAGGAGCCCG  
Mattis TTCTGGCGATTTTTTCGTGCCGGCGCCTAAAAATGGCCCAGTCGCGTCCCCAGGAGCCCG  
Julius TTCTGGCGATTTTTTCGTGCCGGCGCCTAAAAATGGCCCAGTCGCGTCCCCAGGAGCCCG  
Arina TTCTGGCGATTTTTTCGTGCCGGCGCCTAAAAATGGCCCAGTCGCGTCCCCAGGAGCCCG  
Spelta TTCTGGCGATTTTTTCGTGCCGGCGCCTAAAAATGGCCCAGTCGCGTCCCCAGGAGCCCG  
Lancer CCAGGCGATTTTTTCGTGCCGGCGCCTAAAAATGGCCCAGTCGCGTCCCCAGGAGCCCG  
Gladius TCCAGGCGATTTTTTCGTGCCGGCGCCTAAAAATGGCCCAGTCGCGTCCCCAGGAGCCCG  
Kukri TCCAGGCGATTTTTTCGTGCCGGCGCCTAAAAATGGCCCAGTCGCGTCCCCAGGAGCCCG  
Landmark TCCAGGCGATTTTTTCGTGCCGGCGCCTAAAAATGGCCCAGTCGCGTCCCCAGGAGCCCG  
Mace TCCAGGCGATTTTTTCGTGCCGGCGCCTAAAAATGGCCCAGTCGCGTCCCCAGGAGCCCG  
STANLEY TCCAGGCGATTTTTTCGTGCCGGCGCCTAAAAATGGCCCAGTCGCGTCCCCAGGAGCCCG  
\* \*\*\*\*\*

v v v

Drysdale TTTTTCACCGGCTTGGGCCGAAATCAGTACAGACGGACCCAGGCCGAACCCGGCGCACTG  
RAC875 TTTTTCACCGGCTTGGGCCGAAATCAGTACAGACGGACCCAGGCCGAACCCGGCGCACTG  
Norin61 TTTTTCACCGGCTTGGGCCGAAATCAGTACAGACGGACCCAGGCCGAACCCGGCGCACTG  
Jagger TTTTTCACCGGCTTGGGCCGAAATCAGTACAGACGGACCCAGGCCGAACCCGGCGCACTG  
Mattis TTTTTCACCGGCTTGGGCCGAAATCAGTACAGACGGACCCAGGCCGAACCCGGCGCACTG  
Julius TTTTTCACCGGCTTGGGCCGAAATCAGTACAGACGGACCCAGGCCGAACCCGGCGCACTG  
Arina TTTTTCACCGGCTTGGGCCGAAATCAGTACAGACGGACCCAGGCCGAACCCGGCGCACTG  
Spelta TTTTTCACCGGCTTGGGCCGAAATCAGTACAGACGGACCCAGGCCGAACCCGGCGCACTG  
Lancer TTTTTCACCGGCTTGGGCCGAAATCAGTACAGGCGGACCCAGGCCGAACCCGGCGCGCTG  
Gladius TTTTTCACCGGCTTGGGCCGAAATCAATACAGGCGGACCCAGGCCGAACCCGGCGCGCTG  
Kukri TTTTTCACCGGCTTGGGCCGAAATCAATACAGGCGGACCCAGGCCGAACCCGGCGCGCTG  
Landmark TTTTTCACCGGCTTGGGCCGAAATCAATACAGGCGGACCCAGGCCGAACCCGGCGCGCTG  
Mace TTTTTCACCGGCTTGGGCCGAAATCAATACAGGCGGACCCAGGCCGAACCCGGCGCGCTG  
STANLEY TTTTTCACCGGCTTGGGCCGAAATCAATACAGGCGGACCCAGGCCGAACCCGGCGCGCTG  
\*\*\*\*\*

v

Drysdale GGGGCGCCGGGGCGAGTGGTTTTGGCGCGAAATAGCCGCGGGCCACCGAGTCTGCGAGA  
RAC875 GGGGCGCCGGGGCGAGTGGTTTTGGCGCGAAATAGCCGCGGGCCACCGAGTCTGCGAGA  
Norin61 GGGGCGCCGGGGCGAGTGGTTTTGGCGCGAAATAGCCGCGGGCCACCGAGTCTGCGAGA  
Jagger GGGGCGCCGGGGCGAGTGGTTTTGGCGCGAAATAGCCGCGGGCCACCGAGTCTGCGAGA  
Mattis GGGGCGCCGGGGCGAGTGGTTTTGGCGCGAAATAGCCGCGGGCCACCGAGTCTGCGAGA  
Julius GGGGCGCCGGGGCGAGTGGTTTTGGCGCGAAATAGCCGCGGGCCACCGAGTCTGCGAGA  
Arina GGGGCGCCGGGGCGAGTGGTTTTGGCGCGAAATAGCCGCGGGCCACCGAGTCTGCGAGA  
Spelta GGGGCGCCGGGGCGAGTGGTTTTGGCGCGAAATAGCCGCGGGCCACCGAGTCTGCGAGA  
Lancer GGGGCGCCGGGGCGAGTGGTTTTGGCGCGAAATAGCCGCGGGCCACCGAGTCTGCGAGA  
Gladius GGGGCGCCGGGGCGAGTGGTTTTGGCGCGAAATAGCCGCGGGCCACCGAGTCTGCGAGA  
Kukri GGGGCGCCGGGGCGAGTGGTTTTGGCGCGAAATAGCCGCGGGCCACCGAGTCTGCGAGA  
Landmark GGGGCGCCGGGGCGAGTGGTTTTGGCGCGAAATAGCCGCGGGCCACCGAGTCTGCGAGA  
Mace GGGGCGCCGGGGCGAGTGGTTTTGGCGCGAAATAGCCGCGGGCCACCGAGTCTGCGAGA  
STANLEY GGGGCGCCGGGGCGAGTGGTTTTGGCGCGAAATAGCCGCGGGCCACCGAGTCTGCGAGA  
\*\*\*\*\*

Drysdale CGGCCGCTTCGTGCGCCTCATCGCCTTGGTTCCACGGGAATCAATGCCAAGACTGCCAC  
RAC875 CGGCCGCTTCGTGCGCCTCATCGCCTTGGTTCCACGGGAATCAATGCCAAGACTGCCAC  
Norin61 CGGCCGCTTCGTGCGCCTCATCGCCTTGGTTCCACGGGAATCAATGCCAAGACTGCCAC  
Jagger CGGCCGCTTCGTGCGCCTCATCGCCTTGGTTCCACGGGAATCAATGCCAAGACTGCCAC  
Mattis CGGCCGCTTCGTGCGCCTCATCGCCTTGGTTCCACGGGAATCAATGCCAAGACTGCCAC  
Julius CGGCCGCTTCGTGCGCCTCATCGCCTTGGTTCCACGGGAATCAATGCCAAGACTGCCAC  
Arina CGGCCGCTTCGTGCGCCTCATCGCCTTGGTTCCACGGGAATCAATGCCAAGACTGCCAC  
Spelta CGGCCGCTTCGTGCGCCTCATCGCCTTGGTTCCACGGGAATCAATGCCAAGACTGCCAC  
Lancer CGGCCGCTTCGTGCGCCTCATCGCCTTGGTTCCACGGGAATCAATGCCAAGACTGCCAC  
Gladius CGGCCGCTTCGTGCGCCTCATCGCCTTGGTTCCACGGGAATCAATGCCAAGACTGCCAC  
Kukri CGGCCGCTTCGTGCGCCTCATCGCCTTGGTTCCACGGGAATCAATGCCAAGACTGCCAC  
Landmark CGGCCGCTTCGTGCGCCTCATCGCCTTGGTTCCACGGGAATCAATGCCAAGACTGCCAC  
Mace CGGCCGCTTCGTGCGCCTCATCGCCTTGGTTCCACGGGAATCAATGCCAAGACTGCCAC  
STANLEY CGGCCGCTTCGTGCGCCTCATCGCCTTGGTTCCACGGGAATCAATGCCAAGACTGCCAC  
\*\*\*\*\*

v

Drysdale GATGCCGCCCGGTCAGCCTTGCCATTGATAGCTCATCACGGGCGGCGGTCACGGGTG  
RAC875 GATGCCGCCCGGTCAGCCTTGCCATTGATAGCTCATCACGGGCGGCGGTCACGGGTG  
Norin61 GATGCCGCCCGGTCAGCCTTGCCATTGATAGCTCATCACGGGCGGCGGTCACGGGTG  
Jagger GATGCCGCCCGGTCAGCCTTGCCATTGATAGCTCATCACGGGCGGCGGTCACGGGTG  
Mattis GATGCCGCCCGGTCAGCCTTGCCATTGATAGCTCATCACGGGCGGCGGTCACGGGTG  
Julius GATGCCGCCCGGTCAGCCTTGCCATTGATAGCTCATCACGGGCGGCGGTCACGGGTG  
Arina GATGCCGCCCGGTCAGCCTTGCCATTGATAGCTCATCACGGGCGGCGGTCACGGGTG  
Spelta GATGCCGCCCGGTCAGCCTTGCCATTGATAGCTCATCACGGGCGGCGGTCACGGGTG  
Lancer GATGCCGCCCGGTCAGCCTTGCCATTGATAGCTCATCACGGGCGGCGGTCACGGGTG  
Gladius GATGCCGCCCGGTCAGCCTTGCCATTGATAGCTCATCACGGGCGGCGGTCACGGGTG  
Kukri GATGCCGCCCGGTCAGCCTTGCCATTGATAGCTCATCACGGGCGGCGGTCACGGGTG  
Landmark GATGCCGCCCGGTCAGCCTTGCCATTGATAGCTCATCACGGGCGGCGGTCACGGGTG  
Mace GATGCCGCCCGGTCAGCCTTGCCATTGATAGCTCATCACGGGCGGCGGTCACGGGTG  
STANLEY GATGCCGCCCGGTCAGCCTTGCCATTGATAGCTCATCACGGGCGGCGGTCACGGGTG  
\*\*\*\*\*

Drysdale GCGGGGCGACGCCTCCCCTCCCGCCACGCGTACACACGGGGCGGACTATATAAGCCGGTG  
RAC875 GCGGGGCGACGCCTCCCCTCCCGCCACGCGTACACACGGGGCGGACTATATAAGCCGGTG  
Norin61 GCGGGGCGACGCCTCCCCTCCCGCCACGCGTACACACGGGGCGGACTATATAAGCCGGTG  
Jagger GCGGGGCGACGCCTCCCCTCCCGCCACGCGTACACACGGGGCGGACTATATAAGCCGGTG  
Mattis GCGGGGCGACGCCTCCCCTCCCGCCACGCGTACACACGGGGCGGACTATATAAGCCGGTG  
Julius GCGGGGCGACGCCTCCCCTCCCGCCACGCGTACACACGGGGCGGACTATATAAGCCGGTG  
Arina GCGGGGCGACGCCTCCCCTCCCGCCACGCGTACACACGGGGCGGACTATATAAGCCGGTG  
Spelta GCGGGGCGACGCCTCCCCTCCCGCCACGCGTACACACGGGGCGGACTATATAAGCCGGTG  
Lancer GCGGGGCGACGCCTCCCCTCCCGCCACGCGTACACACGGGGCGGACTATATAAGCCGGTG  
Gladius GCGGGGCGACGCCTCCCCTCCCGCCACGCGTACACACGGGGCGGACTATATAAGCCGGTG  
Kukri GCGGGGCGACGCCTCCCCTCCCGCCACGCGTACACACGGGGCGGACTATATAAGCCGGTG  
Landmark GCGGGGCGACGCCTCCCCTCCCGCCACGCGTACACACGGGGCGGACTATATAAGCCGGTG  
Mace GCGGGGCGACGCCTCCCCTCCCGCCACGCGTACACACGGGGCGGACTATATAAGCCGGTG  
STANLEY GCGGGGCGACGCCTCCCCTCCCGCCACGCGTACACACGGGGCGGACTATATAAGCCGGTG  
\*\*\*\*\*

Drysdale GCCTCCCTCACCTTTGGCCACACCAGCCCTCGCCGTCCATCGACCGCCGTCGAGCTCTTC  
RAC875 GCCTCCCTCACCTTTGGCCACACCAGCCCTCGCCGTCCATCGACCGCCGTCGAGCTCTTC  
Norin61 GCCTCCCTCACCTTTGGCCACACCAGCCCTCGCCGTCCATCGACCGCCGTCGAGCTCTTC  
Jagger GCCTCCCTCACCTTTGGCCACACCAGCCCTCGCCGTCCATCGACCGCCGTCGAGCTCTTC  
Mattis GCCTCCCTCACCTTTGGCCACACCAGCCCTCGCCGTCCATCGACCGCCGTCGAGCTCTTC  
Julius GCCTCCCTCACCTTTGGCCACACCAGCCCTCGCCGTCCATCGACCGCCGTCGAGCTCTTC  
Arina GCCTCCCTCACCTTTGGCCACACCAGCCCTCGCCGTCCATCGACCGCCGTCGAGCTCTTC  
Spelta GCCTCCCTCACCTTTGGCCACACCAGCCCTCGCCGTCCATCGACCGCCGTCGAGCTCTTC  
Lancer GCCTCCCTCACCTTTGGCCACACCAGCCCTCGCCGTCCATCGACCGCCGTCGAGCTCTTC  
Gladius GCCTCCCTCACCTTTGGCCACACCAGCCCTCGCCGTCCATCGACCGCCGTCGAGCTCTTC  
Kukri GCCTCCCTCACCTTTGGCCACACCAGCCCTCGCCGTCCATCGACCGCCGTCGAGCTCTTC  
Landmark GCCTCCCTCACCTTTGGCCACACCAGCCCTCGCCGTCCATCGACCGCCGTCGAGCTCTTC  
Mace GCCTCCCTCACCTTTGGCCACACCAGCCCTCGCCGTCCATCGACCGCCGTCGAGCTCTTC  
STANLEY GCCTCCCTCACCTTTGGCCACACCAGCCCTCGCCGTCCATCGACCGCCGTCGAGCTCTTC  
\*\*\*\*\*

Drysdale CTCTCCCGTGCGCAGCCGCGACGCTCCTTCCCTCCCTCTCCCTCACTCCCAAGCCGGTG  
RAC875 CTCTCCCGTGCGCAGCCGCGACGCTCCTTCCCTCCCTCTCCCTCACTCCCAAGCCGGTG  
Norin61 CTCTCCCGTGCGCAGCCGCGACGCTCCTTCCCTCCCTCTCCCTCACTCCCAAGCCGGTG  
Jagger CTCTCCCGTGCGCAGCCGCGACGCTCCTTCCCTCCCTCTCCCTCACTCCCAAGCCGGTG  
Mattis CTCTCCCGTGCGCAGCCGCGACGCTCCTTCCCTCCCTCTCCCTCACTCCCAAGCCGGTG  
Julius CTCTCCCGTGCGCAGCCGCGACGCTCCTTCCCTCCCTCTCCCTCACTCCCAAGCCGGTG  
Arina CTCTCCCGTGCGCAGCCGCGACGCTCCTTCCCTCCCTCTCCCTCACTCCCAAGCCGGTG  
Spelta CTCTCCCGTGCGCAGCCGCGACGCTCCTTCCCTCCCTCTCCCTCACTCCCAAGCCGGTG  
Lancer CTCTCCCGTGCGCAGCCGCGACGCTCCTTCCCTCCCTCTCCCTCACTCCCAAGCCGGTG  
Gladius CTCTCCCGTGCGCAGCCGCGACGCTCCTTCCCTCCCTCTCCCTCACTCCCAAGCCGGTG  
Kukri CTCTCCCGTGCGCAGCCGCGACGCTCCTTCCCTCCCTCTCCCTCACTCCCAAGCCGGTG  
Landmark CTCTCCCGTGCGCAGCCGCGACGCTCCTTCCCTCCCTCTCCCTCACTCCCAAGCCGGTG  
Mace CTCTCCCGTGCGCAGCCGCGACGCTCCTTCCCTCCCTCTCCCTCACTCCCAAGCCGGTG  
STANLEY CTCTCCCGTGCGCAGCCGCGACGCTCCTTCCCTCCCTCTCCCTCACTCCCAAGCCGGTG  
\*\*\*\*\*

Drysdale GCCGCGCGTTTTCCCGGGCGACGGCCAACGGCTTCGGTCACCGCTCGCTTCACGAGTGGGA  
RAC875 GCCGCGCGTTTTCCCGGGCGACGGCCAACGGCTTCGGTCACCGCTCGCTTCACGAGTGGGA  
Norin61 GCCGCGCGTTTTCCCGGGCGACGGCCAACGGCTTCGGTCACCGCTCGCTTCACGAGTGGGA  
Jagger GCCGCGCGTTTTCCCGGGCGACGGCCAACGGCTTCGGTCACCGCTCGCTTCACGAGTGGGA  
Mattis GCCGCGCGTTTTCCCGGGCGACGGCCAACGGCTTCGGTCACCGCTCGCTTCACGAGTGGGA  
Julius GCCGCGCGTTTTCCCGGGCGACGGCCAACGGCTTCGGTCACCGCTCGCTTCACGAGTGGGA  
Arina GCCGCGCGTTTTCCCGGGCGACGGCCAACGGCTTCGGTCACCGCTCGCTTCACGAGTGGGA  
Spelta GCCGCGCGTTTTCCCGGGCGACGGCCAACGGCTTCGGTCACCGCTCGCTTCACGAGTGGGA  
Lancer GCCGCGCGTTTTCCCGGGCGACGGCCAACGGCTTCGGTCACCGCTCGCTTCACGAGTGGGA  
Gladius GCCGCGCGTTTTCCCGGGCGACGGCCAACGGCTTCGGTCACCGCTCGCTTCACGAGTGGGA  
Kukri GCCGCGCGTTTTCCCGGGCGACGGCCAACGGCTTCGGTCACCGCTCGCTTCACGAGTGGGA  
Landmark GCCGCGCGTTTTCCCGGGCGACGGCCAACGGCTTCGGTCACCGCTCGCTTCACGAGTGGGA  
Mace GCCGCGCGTTTTCCCGGGCGACGGCCAACGGCTTCGGTCACCGCTCGCTTCACGAGTGGGA  
STANLEY GCCGCGCGTTTTCCCGGGCGACGGCCAACGGCTTCGGTCACCGCTCGCTTCACGAGTGGGA  
\*\*\*\*\*

Drysdale GCGGTGGCTCCTGTTTCGAGGCGAACATCCCAGGCGCCACCGGACATGCGCGCATGAACGAT  
RAC875 GCGGTGGCTCCTGTTTCGAGGCGAACATCCCAGGCGCCACCGGACATGCGCGCATGAACGAT  
Norin61 GCGGTGGCTCCTGTTTCGAGGCGAACATCCCAGGCGCCACCGGACATGCGCGCATGAACGAT  
Jagger GCGGTGGCTCCTGTTTCGAGGCGAACATCCCAGGCGCCACCGGACATGCGCGCATGAACGAT  
Mattis GCGGTGGCTCCTGTTTCGAGGCGAACATCCCAGGCGCCACCGGACATGCGCGCATGAACGAT  
Julius GCGGTGGCTCCTGTTTCGAGGCGAACATCCCAGGCGCCACCGGACATGCGCGCATGAACGAT  
Arina GCGGTGGCTCCTGTTTCGAGGCGAACATCCCAGGCGCCACCGGACATGCGCGCATGAACGAT  
Spelta GCGGTGGCTCCTGTTTCGAGGCGAACATCCCAGGCGCCACCGGACATGCGCGCATGAACGAT  
Lancer GCGGTGGCTCCTGTTTCGAGGCGAACATCCCAGGCGCCACCGGACATGCGCGCATGAACGAT  
Gladius GCGGTGGCTCCTGTTTCGAGGCGAACATCCCAGGCGCCACCGGACATGCGCGCATGAACGAT  
Kukri GCGGTGGCTCCTGTTTCGAGGCGAACATCCCAGGCGCCACCGGACATGCGCGCATGAACGAT  
Landmark GCGGTGGCTCCTGTTTCGAGGCGAACATCCCAGGCGCCACCGGACATGCGCGCATGAACGAT  
Mace GCGGTGGCTCCTGTTTCGAGGCGAACATCCCAGGCGCCACCGGACATGCGCGCATGAACGAT  
STANLEY GCGGTGGCTCCTGTTTCGAGGCGAACATCCCAGGCGCCACCGGACATGCGCGCATGAACGAT  
\*\* \*\*\*\*\*

Drysdale GGGGTGGAGACTCGGCAACGGGGGAGTGCCCAT-CCCCCGGTGCCGACGTCGAGGCGT  
RAC875 GGGGTGGAGACTCGGCAACGGGGGAGTGCCCAT-CCCCCGGTGCCGACGTCGAGGCGT  
Norin61 GGGGTGGAGACTCGGCAACGGGGGAGTGCCCAT-CCCCCGGTGCCGACGTCGAGGCGT  
Jagger GGGGTGGAGACTCGGCAACGGGGGAGTGCCCAT-CCCCCGGTGCCGACGTCGAGGCGT  
Mattis GGGGTGGAGACTCGGCAACGGGGGAGTGCCCAT-CCCCCGGTGCCGACGTCGAGGCGT  
Julius GGGGTGGAGACTCGGCAACGGGGGAGTGCCCAT-CCCCCGGTGCCGACGTCGAGGCGT  
Arina GGGGTGGAGACTCGGCAACGGGGGAGTGCCCAT-CCCCCGGTGCCGACGTCGAGGCGT  
Spelta GGGGTGGAGACTCGGCAACGGGGGAGTGCCCAT-CCCCCGGTGCCGACGTCGAGGCGT  
Lancer GGGGTGGAGACTCGGCAACGGGGGAGTGCCCAT-CCCCCGGTGCCGACGTCGAGGCGT  
Gladius GGGGTGGAGACTCGGCAACGGGGGAGTGCCCAT-CCCCCGGTGCCGACGTCGAGGCGT  
Kukri GGGGTGGAGACTCGGCAACGGGGGAGTGCCCAT-CCCCCGGTGCCGACGTCGAGGCGT  
Landmark GGGGTGGAGACTCGGCAACGGGGGAGTGCCCAT-CCCCCGGTGCCGACGTCGAGGCGT  
Mace GGGGTGGAGACTCGGCAACGGGGGAGTGCCCAT-CCCCCGGTGCCGACGTCGAGGCGT  
STANLEY GGGGTGGAGACTCGGCAACGGGGGAGTGCCCAT-CCCCCGGTGCCGACGTCGAGGCGT  
\*\*\*\*\*

vv

Drysdale GCCCCGCTTCTTCGCCGCCGAGGTGACCGCGTGCAAGCCT-TCTCACAGCGGAGCAAC  
RAC875 GCCCCGCTTCTTCGCCGCCGAGGTGACCGCGTGCAAGCCT-TCTCACAGCGGAGCAAC  
Norin61 GCCCCGCTTCTTCGCCGCCGAGGTGACCGCGTGCAAGCCT-TCTCACAGCGGAGCAAC  
Jagger GCCCCGCTTCTTCGCCGCCGAGGTGACCGCGTGCAAGCCT-TCTCACAGCGGAGCAAC  
Mattis GCCCCGCTTCTTCGCCGCCGAGGTGACCGCGTGCAAGCCT-TCTCACAGCGGAGCAAC  
Julius GCCCCGCTTCTTCGCCGCCGAGGTGACCGCGTGCAAGCCT-TCTCACAGCGGAGCAAC  
Arina GCCCCGCTTCTTCGCCGCCGAGGTGACCGCGTGCAAGCCT-TCTCACAGCGGAGCAAC  
Spelta GCCCCGCTTCTTCGCCGCCGAGGTGACCGCGTGCAAGCCT-TCTCACAGCGGAGCAAC  
Lancer GCCCCGCTTCTTCGCCGCCGAGGTGACCGCGTGCAAGCCT-TCTCACAGCGGAGCAAC  
Gladius GCCCCGCTTCTTCGCCGCCGAGGTGACCGCGTGCAAGCCTTCCCTCACAGCGGAGCAAC  
Kukri GCCCCGCTTCTTCGCCGCCGAGGTGACCGCGTGCAAGCCTTCCCTCACAGCGGAGCAAC  
Landmark GCCCCGCTTCTTCGCCGCCGAGGTGACCGCGTGCAAGCCTTCCCTCACAGCGGAGCAAC  
Mace GCCCCGCTTCTTCGCCGCCGAGGTGACCGCGTGCAAGCCTTCCCTCACAGCGGAGCAAC  
STANLEY GCCCCGCTTCTTCGCCGCCGAGGTGACCGCGTGCAAGCCTTCCCTCACAGCGGAGCAAC  
\*\*\*\*\*

v

Drysdale TCGCCCCCACCAGTACGCCGTGAAAACCACGCGGCGTGGGCGGCGTACTTCCAGCGCC  
RAC875 TCGCCCCCACCAGTACGCCGTGAAAACCACGCGGCGTGGGCGGCGTACTTCCAGCGCC  
Norin61 TCGCCCCCACCAGTACGCCGTGAAAACCACGCGGCGTGGGCGGCGTACTTCCAGCGCC  
Jagger TCGCCCCCACCAGTACGCCGTGAAAACCACGCGGCGTGGGCGGCGTACTTCCAGCGCC  
Mattis TCGCCCCCACCAGTACGCCGTGAAAACCACGCGGCGTGGGCGGCGTACTTCCAGCGCC  
Julius TCGCCCCCACCAGTACGCCGTGAAAACCACGCGGCGTGGGCGGCGTACTTCCAGCGCC  
Arina TCGCCCCCACCAGTACGCCGTGAAAACCACGCGGCGTGGGCGGCGTACTTCCAGCGCC  
Spelta TCGCCCCCACCAGTACGCCGTGAAAACCACGCGGCGTGGGCGGCGTACTTCCAGCGCC  
Lancer TCGCCCCCACCAGTACGCCGTGAAAACCACGCGGCGTGGGCGGCGTACTTCCAGCGCC  
Gladius TCGCCCCCACCAGTACGCCGTGAAAACCACGCGGCGTGGGCGGCGTACTTCCAGCACC  
Kukri TCGCCCCCACCAGTACGCCGTGAAAACCACGCGGCGTGGGCGGCGTACTTCCAGCACC  
Landmark TCGCCCCCACCAGTACGCCGTGAAAACCACGCGGCGTGGGCGGCGTACTTCCAGCACC  
Mace TCGCCCCCACCAGTACGCCGTGAAAACCACGCGGCGTGGGCGGCGTACTTCCAGCACC  
STANLEY TCGCCCCCACCAGTACGCCGTGAAAACCACGCGGCGTGGGCGGCGTACTTCCAGCACC  
\*\*\*\*\* \*\*



Drysdale CACTCCTCCTCCCGTTCTTCTTCCCCTCCTCCGGCTCGACGACGTTGCTCGGCGTCAAG  
RAC875 CACTCCTCCTCCCGTTCTTCTTCCCCTCCTCCGGCTCGACGACGTTGCTCGGCGTCAAG  
Norin61 CACTCCTCCTCCCGTTCTTCTTCCCCTCCTCCGGCTCGACGACGTTGCTCGGCGTCAAG  
Jagger CACTCCTCCTCCCGTTCTTCTTCCCCTCCTCCGGCTCGACGACGTTGCTCGGCGTCAAG  
Mattis CACTCCTCCTCCCGTTCTTCTTCCCCTCCTCCGGCTCGACGACGTTGCTCGGCGTCAAG  
Julius CACTCCTCCTCCCGTTCTTCTTCCCCTCCTCCGGCTCGACGACGTTGCTCGGCGTCAAG  
Arina CACTCCTCCTCCCGTTCTTCTTCCCCTCCTCCGGCTCGACGACGTTGCTCGGCGTCAAG  
Spelta CACTCCTCCTCCCGTTCTTCTTCCCCTCCTCCGGCTCGACGACGTTGCTCGGCGTCAAG  
Lancer CACTCCTCCTCCCGTTCTTCTTCCCCTCCTCCGGCTCGACGACGTTGCTCGGCGTCAAG  
Gladius CACTCCTCCTCCCGTTCTTCTTCCCCTCCTCCGGCTCGACGACGTTGCTCGGCGTCAAG  
Kukri CACTCCTCCTCCCGTTCTTCTTCCCCTCCTCCGGCTCGACGACGTTGCTCGGCGTCAAG  
Landmark CACTCCTCCTCCCGTTCTTCTTCCCCTCCTCCGGCTCGACGACGTTGCTCGGCGTCAAG  
Mace CACTCCTCCTCCCGTTCTTCTTCCCCTCCTCCGGCTCGACGACGTTGCTCGGCGTCAAG  
STANLEY CACTCCTCCTCCCGTTCTTCTTCCCCTCCTCCGGCTCGACGACGTTGCTCGGCGTCAAG  
\*\*\*\*\*

v

Drysdale GCCGAGCCCGCAGCGGAGACGCTGCTCGGCCGGCGCACTCGCAGCGTCGGCATCATCATA  
RAC875 GCCGAGCCCGCAGCGGAGACGCTGCTCGGCCGGCGCACTCGCAGCGTCGGCATCATCATA  
Norin61 GCCGAGCCCGCAGCGGAGACGCTGCTCGGCCGGCGCACTCGCAGCGTCGGCATCATCATA  
Jagger GCCGAGCCCGCAGCGGAGACGCTGCTCGGCCGGCGCACTCGCAGCGTCGGCATCATCATA  
Mattis GCCGAGCCCGCAGCGGAGACGCTGCTCGGCCGGCGCACTCGCAGCGTCGGCATCATCATA  
Julius GCCGAGCCCGCAGCGGAGACGCTGCTCGGCCGGCGCACTCGCAGCGTCGGCATCATCATA  
Arina GCCGAGCCCGCAGCGGAGACGCTGCTCGGCCGGCGCACTCGCAGCGTCGGCATCATCATA  
Spelta GCCGAGCCCGCAGCGGAGACGCTGCTCGGCCGGCGCACTCGCAGCGTCGGCATCATCATA  
Lancer GCCGAGCCCGCAGCGGAGACGCTGCTCGGCCGGCGCACTCGCAGCGTCGGCATCATCATA  
Gladius GCCGAGCCCGCAGCGGAGACGCTGCTCGGCCGGCGCACTCGCAGCGTCGGCATCATCATA  
Kukri GCCGAGCCCGCAGCGGAGACGCTGCTCGGCCGGCGCACTCGCAGCGTCGGCATCATCATA  
Landmark GCCGAGCCCGCAGCGGAGACGCTGCTCGGCCGGCGCACTCGCAGCGTCGGCATCATCATA  
Mace GCCGAGCCCGCAGCGGAGACGCTGCTCGGCCGGCGCACTCGCAGCGTCGGCATCATCATA  
STANLEY GCCGAGCCCGCAGCGGAGACGCTGCTCGGCCGGCGCACTCGCAGCGTCGGCATCATCATA  
\*\*\*\*\*

v

Drysdale AACGAGGGCGGCCGGCGCTCCTCCTCATCGGCTCCTCCGCGCTTCGTCAAACCAAAGACG  
RAC875 AACGAGGGCGGCCGGCGCTCCTCCTCATCGGCTCCTCCGCGCTTCGTCAAACCAAAGACG  
Norin61 AACGAGGGCGGCCGGCGCTCCTCCTCATCGGCTCCTCCGCGCTTCGTCAAACCAAAGACG  
Jagger AACGAGGGCGGCCGGCGCTCCTCCTCATCGGCTCCTCCGCGCTTCGTCAAACCAAAGACG  
Mattis AACGAGGGCGGCCGGCGCTCCTCCTCATCGGCTCCTCCGCGCTTCGTCAAACCAAAGACG  
Julius AACGAGGGCGGCCGGCGCTCCTCCTCATCGGCTCCTCCGCGCTTCGTCAAACCAAAGACG  
Arina AACGAGGGCGGCCGGCGCTCCTCCTCATCGGCTCCTCCGCGCTTCGTCAAACCAAAGACG  
Spelta AACGAGGGCGGCCGGCGCTCCTCCTCATCGGCTCCTCCGCGCTTCGTCAAACCAAAGACG  
Lancer AACGAGGGCGGCCGGCGCTCCTCCTCATCGGCTCCTCCGCGCTTCGTCAAACCAAAGAC -  
Gladius AACGAGGGCGGCCGGCGCTCCTCCTCATCGGCTCCTCCGCGCTTCGTCAAACCAAAGAC -  
Kukri AACGAGGGCGGCCGGCGCTCCTCCTCATCGGCTCCTCCGCGCTTCGTCAAACCAAAGAC -  
Landmark AACGAGGGCGGCCGGCGCTCCTCCTCATCGGCTCCTCCGCGCTTCGTCAAACCAAAGAC -  
Mace AACGAGGGCGGCCGGCGCTCCTCCTCATCGGCTCCTCCGCGCTTCGTCAAACCAAAGAC -  
STANLEY AACGAGGGCGGCCGGCGCTCCTCCTCATCGGCTCCTCCGCGCTTCGTCAAACCAAAGAC -  
\*\*\*\*\*

Drysdale GGAACCGAGGCTCGCGGCCGTGAAAACGGAGCCGGGGCTCCCCGCCGTGAAGACAGAGCA  
RAC875 GGAACCGAGGCTCGCGGCCGTGAAAACGGAGCCGGGGCTCCCCGCCGTGAAGACAGAGCA  
Norin61 GGAACCGAGGCTCGCGGCCGTGAAAACGGAGCCGGGGCTCCCCGCCGTGAAGACAGAGCA  
Jagger GGAACCGAGGCTCGCGGCCGTGAAAACGGAGCCGGGGCTCCCCGCCGTGAAGACAGAGCA  
Mattis GGAACCGAGGCTCGCGGCCGTGAAAACGGAGCCGGGGCTCCCCGCCGTGAAGACAGAGCA  
Julius GGAACCGAGGCTCGCGGCCGTGAAAACGGAGCCGGGGCTCCCCGCCGTGAAGACAGAGCA  
Arina GGAACCGAGGCTCGCGGCCGTGAAAACGGAGCCGGGGCTCCCCGCCGTGAAGACAGAGCA  
Spelta GGAACCGAGGCTCGCGGCCGTGAAAACGGAGCCGGGGCTCCCCGCCGTGAAGACAGAGCA  
Lancer GGAACCGAGGCTCGCGGCCGTGAAAACGGAGCCGGGGCTCCCCGCCGTGAAGACAGAGCA  
Gladius GGAACCGAGGCTCGCGGCCGTGAAAACGGAGCCGGGGCTCCCCGCCGTGAAGACAGAGCA  
Kukri GGAACCGAGGCTCGCGGCCGTGAAAACGGAGCCGGGGCTCCCCGCCGTGAAGACAGAGCA  
Landmark GGAACCGAGGCTCGCGGCCGTGAAAACGGAGCCGGGGCTCCCCGCCGTGAAGACAGAGCA  
Mace GGAACCGAGGCTCGCGGCCGTGAAAACGGAGCCGGGGCTCCCCGCCGTGAAGACAGAGCA  
STANLEY GGAACCGAGGCTCGCGGCCGTGAAAACGGAGCCGGGGCTCCCCGCCGTGAAGACAGAGCA  
\*\*\*\*\*



Drysdale CGGCGACGTGGAGCTCGATGAGGAGGCGACCCTAAAATGGGCGCGCACCGACTGGCTCAA  
 RAC875 CGGCGACGTGGAGCTCGATGAGGAGGCGACCCTAAAATGGGCGCGCACCGACTGGCTCAA  
 Norin61 CGGCGACGTGGAGCTCGATGAGGAGGCGACCCTAAAATGGGCGCGCACCGACTGGCTCAA  
 Jagger CGGCGACGTGGAGCTCGATGAGGAGGCGACCCTAAAATGGGCGCGCACCGACTGGCTCAA  
 Mattis CGGCGACGTGGAGCTCGATGAGGAGGCGACCCTAAAATGGGCGCGCACCGACTGGCTCAA  
 Julius CGGCGACGTGGAGCTCGATGAGGAGGCGACCCTAAAATGGGCGCGCACCGACTGGCTCAA  
 Arina CGGCGACGTGGAGCTCGATGAGGAGGCGACCCTAAAATGGGCGCGCACCGACTGGCTCAA  
 Spelta CGGCGACGTGGAGCTCGATGAGGAGGCGACCCTAAAATGGGCGCGCACCGACTGGCTCAA  
 Lancer CGGCGACGTGGAGCTCGATGAGGAGGCGACCCTAAAATGGGCGCGCGCCGACTGGCTCAA  
 Gladius CGGCGACGTGGAGCTCGATGAGGAGGCGACCCTAAAATGGGCGCGCGCCGACTGGCTCAA  
 Kukri CGGCGACGTGGAGCTCGATGAGGAGGCGACCCTAAAATGGGCGCGCGCCGACTGGCTCAA  
 Landmark CGGCGACGTGGAGCTCGATGAGGAGGCGACCCTAAAATGGGCGCGCGCCGACTGGCTCAA  
 Mace CGGCGACGTGGAGCTCGATGAGGAGGCGACCCTAAAATGGGCGCGCGCCGACTGGCTCAA  
 STANLEY CGGCGACGTGGAGCTCGATGAGGAGGCGACCCTAAAATGGGCGCGCGCCGACTGGCTCAA  
 \*\*\*\*\*

Drysdale GATGGAGTGGGAGCGCCAGTGCGCCGCCCTGCAGCACTACGAACAGCGCCGCCAGGGCCG  
 RAC875 GATGGAGTGGGAGCGCCAGTGCGCCGCCCTGCAGCACTACGAACAGCGCCGCCAGGGCCG  
 Norin61 GATGGAGTGGGAGCGCCAGTGCGCCGCCCTGCAGCACTACGAACAGCGCCGCCAGGGCCG  
 Jagger GATGGAGTGGGAGCGCCAGTGCGCCGCCCTGCAGCACTACGAACAGCGCCGCCAGGGCCG  
 Mattis GATGGAGTGGGAGCGCCAGTGCGCCGCCCTGCAGCACTACGAACAGCGCCGCCAGGGCCG  
 Julius GATGGAGTGGGAGCGCCAGTGCGCCGCCCTGCAGCACTACGAACAGCGCCGCCAGGGCCG  
 Arina GATGGAGTGGGAGCGCCAGTGCGCCGCCCTGCAGCACTACGAACAGCGCCGCCAGGGCCG  
 Spelta GATGGAGTGGGAGCGCCAGTGCGCCGCCCTGCAGCACTACGAACAGCGCCGCCAGGGCCG  
 Lancer GATGGAGTGGGAGCGCCAGTGCGCCGCCCTGCAGCACTACGAACAGCGCCGCCAGGGCCG  
 Gladius GATGGAGTGGGAGCGCCAGTGCGCCGCCCTGCAGCACTACGAACAGCGCCGCCAGGGCCG  
 Kukri GATGGAGTGGGAGCGCCAGTGCGCCGCCCTGCAGCACTACGAACAGCGCCGCCAGGGCCG  
 Landmark GATGGAGTGGGAGCGCCAGTGCGCCGCCCTGCAGCACTACGAACAGCGCCGCCAGGGCCG  
 Mace GATGGAGTGGGAGCGCCAGTGCGCCGCCCTGCAGCACTACGAACAGCGCCGCCAGGGCCG  
 STANLEY GATGGAGTGGGAGCGCCAGTGCGCCGCCCTGCAGCACTACGAACAGCGCCGCCAGGGCCG  
 \*\*\*\*\*

Drysdale CGACGAAGGAGGCGTCTGTCCTCAACGACAACGACGACGACGACGCGCCGCCACCGCC  
 RAC875 CGACGAAGGAGGCGTCTGTCCTCAACGACAACGACGACGACGACGCGCCGCCACCGCC  
 Norin61 CGACGAAGGAGGCGTCTGTCCTCAACGACAACGACGACGACGACGCGCCGCCACCGCC  
 Jagger CGACGAAGGAGGCGTCTGTCCTCAACGACAACGACGACGACGACGCGCCGCCACCGCC  
 Mattis CGACGAAGGAGGCGTCTGTCCTCAACGACAACGACGACGACGACGCGCCGCCACCGCC  
 Julius CGACGAAGGAGGCGTCTGTCCTCAACGACAACGACGACGACGACGCGCCGCCACCGCC  
 Arina CGACGAAGGAGGCGTCTGTCCTCAACGACAACGACGACGACGACGCGCCGCCACCGCC  
 Spelta CGACGAAGGAGGCGTCTGTCCTCAACGACAACGACGACGACGACGCGCCGCCACCGCC  
 Lancer CGACGAAGGAGGCGTCTGTCCTCAACGACAACGACGACGACGACGCGCCGCCACCGCC  
 Gladius CGACGAAGGAGGCGTCTGTCCTCAACGACAACGACGACGACGACGCGCCGCCACCGCC  
 Kukri CGACGAAGGAGGCGTCTGTCCTCAACGACAACGACGACGACGACGCGCCGCCACCGCC  
 Landmark CGACGAAGGAGGCGTCTGTCCTCAACGACAACGACGACGACGACGCGCCGCCACCGCC  
 Mace CGACGAAGGAGGCGTCTGTCCTCAACGACAACGACGACGACGACGCGCCGCCACCGCC  
 STANLEY CGACGAAGGAGGCGTCTGTCCTCAACGACAACGACGACGACGACGCGCCGCCACCGCC  
 \*\*\*\*\*

Drysdale ACCGGTCCGCCATGGCGACGCCGGGCAAGGGTCCAGCAGGGGCGGCCGCGTCAAGGAGGA  
 RAC875 ACCGGTCCGCCATGGCGACGCCGGGCAAGGGTCCAGCAGGGGCGGCCGCGTCAAGGAGGA  
 Norin61 ACCGGTCCGCCATGGCGACGCCGGGCAAGGGTCCAGCAGGGGCGGCCGCGTCAAGGAGGA  
 Jagger ACCGGTCCGCCATGGCGACGCCGGGCAAGGGTCCAGCAGGGGCGGCCGCGTCAAGGAGGA  
 Mattis ACCGGTCCGCCATGGCGACGCCGGGCAAGGGTCCAGCAGGGGCGGCCGCGTCAAGGAGGA  
 Julius ACCGGTCCGCCATGGCGACGCCGGGCAAGGGTCCAGCAGGGGCGGCCGCGTCAAGGAGGA  
 Arina ACCGGTCCGCCATGGCGACGCCGGGCAAGGGTCCAGCAGGGGCGGCCGCGTCAAGGAGGA  
 Spelta ACCGGTCCGCCATGGCGACGCCGGGCAAGGGTCCAGCAGGGGCGGCCGCGTCAAGGAGGA  
 Lancer ACCGGTCCGCCATGGCGACGCCGGGCAAGGGTCCAGCAGGGGCGGCCGCGTCAAGGAGGA  
 Gladius ACCGGTCCGCCATGGCGACGCCGGGCAAGGGTCCAGCAGGGGCGGCCGCGTCAAGGAGGA  
 Kukri ACCGGTCCGCCATGGCGACGCCGGGCAAGGGTCCAGCAGGGGCGGCCGCGTCAAGGAGGA  
 Landmark ACCGGTCCGCCATGGCGACGCCGGGCAAGGGTCCAGCAGGGGCGGCCGCGTCAAGGAGGA  
 Mace ACCGGTCCGCCATGGCGACGCCGGGCAAGGGTCCAGCAGGGGCGGCCGCGTCAAGGAGGA  
 STANLEY ACCGGTCCGCCATGGCGACGCCGGGCAAGGGTCCAGCAGGGGCGGCCGCGTCAAGGAGGA  
 \*\*\*\*\*

Drysdale GAAGACCGCCGCCGCGACGACGCGCCGC CACCTCCA CCGGTCCGCCATGGCGACGCCGG  
RAC875 GAAGACCGCCGCCGCGCGACGACGCGCCGC CACCTCCA CCGGTCCGCCATGGCGACGCCGG  
Norin61 GAAGACCGCCGCCGCGCGACGACGCGCCGC CACCTCCA CCGGTCCGCCATGGCGACGCCGG  
Jagger GAAGACCGCCGCCGCGCGACGACGCGCCGC CACCTCCA CCGGTCCGCCATGGCGACGCCGG  
Mattis GAAGACCGCCGCCGCGCGACGACGCGCCGC CACCTCCA CCGGTCCGCCATGGCGACGCCGG  
Julius GAAGACCGCCGCCGCGCGACGACGCGCCGC CACCTCCA CCGGTCCGCCATGGCGACGCCGG  
Arina GAAGACCGCCGCCGCGCGACGACGCGCCGC CACCTCCA CCGGTCCGCCATGGCGACGCCGG  
Spelta GAAGACCGCCGCCGCGCGACGACGCGCCGC CACCTCCA CCGGTCCGCCATGGCGACGCCGG  
Lancer GAAGACCGCCGCCGCGCGACGACGCGCCGC CACCTCCA CCGGTCCGCCATGGCGACGCCGG  
Gladius GAAGACCGCCGCCGCGCGACGACGCGCCGC CACCTCCA CCGGTCCGCCATGGCGACGCCGG  
Kukri GAAGACCGCCGCCGCGCGACGACGCGCCGC CACCTCCA CCGGTCCGCCATGGCGACGCCGG  
Landmark GAAGACCGCCGCCGCGCGACGACGCGCCGC CACCTCCA CCGGTCCGCCATGGCGACGCCGG  
Mace GAAGACCGCCGCCGCGCGACGACGCGCCGC CACCTCCA CCGGTCCGCCATGGCGACGCCGG  
STANLEY GAAGACCGCCGCCGCGCGACGACGCGCCGC CACCTCCA CCGGTCCGCCATGGCGACGCCGG  
\*\*\*\*\*

v  
Drysdale ACAAGGGTCCAGCAGGGGCGGCCGCTAAAGGAGGAGAAGGCCGCCGCGACGACTACGC  
RAC875 ACAAGGGTCCAGCAGGGGCGGCCGCTAAAGGAGGAGAAGGCCGCCGCGACGACTACGC  
Norin61 ACAAGGGTCCAGCAGGGGCGGCCGCTAAAGGAGGAGAAGGCCGCCGCGACGACTACGC  
Jagger ACAAGGGTCCAGCAGGGGCGGCCGCTAAAGGAGGAGAAGGCCGCCGCGACGACTACGC  
Mattis ACAAGGGTCCAGCAGGGGCGGCCGCTAAAGGAGGAGAAGGCCGCCGCGACGACTACGC  
Julius ACAAGGGTCCAGCAGGGGCGGCCGCTAAAGGAGGAGAAGGCCGCCGCGACGACTACGC  
Arina ACAAGGGTCCAGCAGGGGCGGCCGCTAAAGGAGGAGAAGGCCGCCGCGACGACTACGC  
Spelta ACAAGGGTCCAGCAGGGGCGGCCGCTAAAGGAGGAGAAGGCCGCCGCGACGACTACGC  
Lancer GCAAGGGTCCAGCAGGGGCGGCCGCTAAAGGAGGAGAAGGCCGCCGCGACGACTACGC  
Gladius GCAAGGGTCCAGCAGGGGCGGCCGCTAAAGGAGGAGAAGGCCGCCGCGACGACTACGC  
Kukri GCAAGGGTCCAGCAGGGGCGGCCGCTAAAGGAGGAGAAGGCCGCCGCGACGACTACGC  
Landmark GCAAGGGTCCAGCAGGGGCGGCCGCTAAAGGAGGAGAAGGCCGCCGCGACGACTACGC  
Mace GCAAGGGTCCAGCAGGGGCGGCCGCTAAAGGAGGAGAAGGCCGCCGCGACGACTACGC  
STANLEY GCAAGGGTCCAGCAGGGGCGGCCGCTAAAGGAGGAGAAGGCCGCCGCGACGACTACGC  
\*\*\*\*\*

v  
Drysdale CGCGTTCAGCGACTTCTTCGCACCTTCGTTGTAGTTTCGGCTTTTTT-AGATAAAATTTGC  
RAC875 CGCGTTCAGCGACTTCTTCGCACCTTCGTTGTAGTTTCGGCTTTTTT-AGATAAAATTTGC  
Norin61 CGCGTTCAGCGACTTCTTCGCACCTTCGTTGTAGTTTCGGCTTTTTT-AGATAAAATTTGC  
Jagger CGCGTTCAGCGACTTCTTCGCACCTTCGTTGTAGTTTCGGCTTTTTT-AGATAAAATTTGC  
Mattis CGCGTTCAGCGACTTCTTCGCACCTTCGTTGTAGTTTCGGCTTTTTT-AGATAAAATTTGC  
Julius CGCGTTCAGCGACTTCTTCGCACCTTCGTTGTAGTTTCGGCTTTTTT-AGATAAAATTTGC  
Arina CGCGTTCAGCGACTTCTTCGCACCTTCGTTGTAGTTTCGGCTTTTTT-AGATAAAATTTGC  
Spelta CGCGTTCAGCGACTTCTTCGCACCTTCGTTGTAGTTTCGGCTTTTTT-AGATAAAATTTGC  
Lancer CGCGTTCAGCGACTTCTTCGCACCTTCGTTGTAGTTTCGGCTTTTTT-AGATAAAATTTGC  
Gladius CGCGTTCAGCGACTTCTTCGCACCTTCGTTGTAGTTTCGGCTTTTTT-AGATAAAATTTGC  
Kukri CGCGTTCAGCGACTTCTTCGCACCTTCGTTGTAGTTTCGGCTTTTTT-AGATAAAATTTGC  
Landmark CGCGTTCAGCGACTTCTTCGCACCTTCGTTGTAGTTTCGGCTTTTTT-AGATAAAATTTGC  
Mace CGCGTTCAGCGACTTCTTCGCACCTTCGTTGTAGTTTCGGCTTTTTT-AGATAAAATTTGC  
STANLEY CGCGTTCAGCGACTTCTTCGCACCTTCGTTGTAGTTTCGGCTTTTTT-AGATAAAATTTGC  
\*\*\*\*\*

v  
Drysdale TATATAAACTGTCTTCTTTGTGTAATATATGTCCAGTTTACCGAATTTAGCCGAACTTTA  
RAC875 TATATAAACTGTCTTCTTTGTGTAATATATGTCCAGTTTACCGAATTTAGCCGAACTTTA  
Norin61 TATATAAACTGTCTTCTTTGTGTAATATATGTCCAGTTTACCGAATTTAGCCGAACTTTA  
Jagger TATATAAACTGTCTTCTTTGTGTAATATATGTCCAGTTTACCGAATTTAGCCGAACTTTA  
Mattis TATATAAACTGTCTTCTTTGTGTAATATATGTCCAGTTTACCGAATTTAGCCGAACTTTA  
Julius TATATAAACTGTCTTCTTTGTGTAATATATGTCCAGTTTACCGAATTTAGCCGAACTTTA  
Arina TATATAAACTGTCTTCTTTGTGTAATATATGTCCAGTTTACCGAATTTAGCCGAACTTTA  
Spelta TATATAAACTGTCTTCTTTGTGTAATATATGTCCAGTTTACCGAATTTAGCCGAACTTTA  
Lancer TATGTAAACTGTCTTCTTTGTGTAATATATGTCCAGTTTACCGAATTTAGCCGAACTTTA  
Gladius TATGTAAACTGTCTTCTTTGTGTAATATATGTCCAGTTTACCGAATTTAGCCGAACTTTA  
Kukri TATGTAAACTGTCTTCTTTGTGTAATATATGTCCAGTTTACCGAATTTAGCCGAACTTTA  
Landmark TATGTAAACTGTCTTCTTTGTGTAATATATGTCCAGTTTACCGAATTTAGCCGAACTTTA  
Mace TATGTAAACTGTCTTCTTTGTGTAATATATGTCCAGTTTACCGAATTTAGCCGAACTTTA  
STANLEY TATGTAAACTGTCTTCTTTGTGTAATATATGTCCAGTTTACCGAATTTAGCCGAACTTTA  
\*\*\*

|          |   |                                                                |   |  |   |
|----------|---|----------------------------------------------------------------|---|--|---|
|          | v |                                                                | v |  | v |
| Drysdale |   | TTGAATGTTTTTTTAAATTTAGACGGCGTCTGGGAATGGTCATGGGATCGGGCGACTGAG   |   |  |   |
| RAC875   |   | TTGAATGTTTTTTTAAATTTAGACGGCGTCTGGGAATGGTCATGGGATCGGGCGACTGAG   |   |  |   |
| Norin61  |   | TTGAATGTTTTTTTAAATTTAGACGGCGTCTGGGAATGGTCATGGGATCGGGCGACTGAG   |   |  |   |
| Jagger   |   | TTGAATGTTTTTTTAAATTTAGACGGCGTCTGGGAATGGTCATGGGATCGGGCGACTGAG   |   |  |   |
| Mattis   |   | TTGAATGTTTTTTTAAATTTAGACGGCGTCTGGGAATGGTCATGGGATCGGGCGACTGAG   |   |  |   |
| Julius   |   | TTGAATGTTTTTTTAAATTTAGACGGCGTCTGGGAATGGTCATGGGATCGGGCGACTGAG   |   |  |   |
| Arina    |   | TTGAATGTTTTTTTAAATTTAGACGGCGTCTGGGAATGGTCATGGGATCGGGCGACTGAG   |   |  |   |
| Spelta   |   | TTGAATGTTTTTTTAAATTTAGACGGCGTCTGGGAATGGTCATGGGATCGGGCGACTGAG   |   |  |   |
| Lancer   |   | TTGAATGTTTTTTTAAATTTAGACGGCGTCTGGGAATGGTCATGGGATCGGGCGACTGAG   |   |  |   |
| Gladius  |   | TTGAATG-TTTTTTTTAAATTTAGACGGCGTCTGGGAACGGTCATGGGATCGGGCGACTGGG |   |  |   |
| Kukri    |   | TTGAATG-TTTTTTTTAAATTTAGACGGCGTCTGGGAACGGTCATGGGATCGGGCGACTGGG |   |  |   |
| Landmark |   | TTGAATG-TTTTTTTTAAATTTAGACGGCGTCTGGGAACGGTCATGGGATCGGGCGACTGGG |   |  |   |
| Mace     |   | TTGAATG-TTTTTTTTAAATTTAGACGGCGTCTGGGAACGGTCATGGGATCGGGCGACTGGG |   |  |   |
| STANLEY  |   | TTGAATG-TTTTTTTTAAATTTAGACGGCGTCTGGGAACGGTCATGGGATCGGGCGACTGGG |   |  |   |
|          |   | *****                                                          |   |  |   |

|          |   |                                                             |  |   |
|----------|---|-------------------------------------------------------------|--|---|
|          | v | vv                                                          |  | v |
| Drysdale |   | AATCCAGTTGCCCCAGGCGGCGATTTTACGCTCCCCTTGGGGAACGGCTGGAGATGCTC |  |   |
| RAC875   |   | AATCCAGTTGCCCCAGGCGGCGATTTTACGCGCCCCTTGGGGAACGGCTGGAGATGCTC |  |   |
| Norin61  |   | AATCCAGTTGCCCCAGGCGGCGATTTTACGCGCCCCTTGGGGAACGGCTGGAGATGCTC |  |   |
| Jagger   |   | AATCCAGTTGCCCCAGGCGGCGATTTTACGCGCCCCTTGGGGAACGGCTGGAGATGCTC |  |   |
| Mattis   |   | AATCCAGTTGCCCCAGGCGGCGATTTTACGCGCCCCTTGGGGAACGGCTGGAGATGCTC |  |   |
| Julius   |   | AATCCAGTTGCCCCAGGCGGCGATTTTACGCGCCCCTTGGGGAACGGCTGGAGATGCTC |  |   |
| Arina    |   | AATCCAGTTGCCCCAGGCGGCGATTTTACGCGCCCCTTGGGGAACGGCTGGAGATGCTC |  |   |
| Spelta   |   | AATCCAGTTGCCCCAGGCGGCGATTTTACGCGCCCCTTGGGGAACGGCTGGAGATGCTC |  |   |
| Lancer   |   | AATCCAGTTGCCCCAGCGGCGATTTTACCGCCCCTTGGGGAACGGCTGGAGATGCTC   |  |   |
| Gladius  |   | AATCCAGTTG-CCTTAGCGGCGATTTTACGCGCCCCTTGGGGAACGGCTGGAGATGGTC |  |   |
| Kukri    |   | AATCCAGTTG-CCTTAGCGGCGATTTTACGCGCCCCTTGGGGAACGGCTGGAGATGGTC |  |   |
| Landmark |   | AATCCAGTTG-CCTTAGCGGCGATTTTACGCGCCCCTTGGGGAACGGCTGGAGATGGTC |  |   |
| Mace     |   | AATCCAGTTG-CCTTAGCGGCGATTTTACGCGCCCCTTGGGGAACGGCTGGAGATGGTC |  |   |
| STANLEY  |   | AATCCAGTTG-CCTTAGCGGCGATTTTACGCGCCCCTTGGGGAACGGCTGGAGATGGTC |  |   |
|          |   | *****                                                       |  |   |

|          |                                                             |
|----------|-------------------------------------------------------------|
| Drysdale | TGAGTCTCCTTGATGCCCGAGCTCTCGGATGAATGGCAGATTTCTTTGAATGTTGCAGT |
| RAC875   | TGAGTCTCCTTGATGCCCGAGCTCTCGGATGAATGGCAGATTTCTTTGAATGTTGCAGT |
| Norin61  | TGAGTCTCCTTGATGCCCGAGCTCTCGGATGAATGGCAGATTTCTTTGAATGTTGCAGT |
| Jagger   | TGAGTCTCCTTGATGCCCGAGCTCTCGGATGAATGGCAGATTTCTTTGAATGTTGCAGT |
| Mattis   | TGAGTCTCCTTGATGCCCGAGCTCTCGGATGAATGGCAGATTTCTTTGAATGTTGCAGT |
| Julius   | TGAGTCTCCTTGATGCCCGAGCTCTCGGATGAATGGCAGATTTCTTTGAATGTTGCAGT |
| Arina    | TGAGTCTCCTTGATGCCCGAGCTCTCGGATGAATGGCAGATTTCTTTGAATGTTGCAGT |
| Spelta   | TGAGTCTCCTTGATGCCCGAGCTCTCGGATGAATGGCAGATTTCTTTGAATGTTGCAGT |
| Lancer   | TGAGTCTCCTTGATGCCCGAGCTCTCGGATGAATGGCAGATTTCTTTGAATGTTGCAGT |
| Gladius  | TGAGTCTCCTTGATGCCCGAGCTCTCGGATGAATGGCAGATTTCTTTGAATGTTGCAGT |
| Kukri    | TGAGTCTCCTTGATGCCCGAGCTCTCGGATGAATGGCAGATTTCTTTGAATGTTGCAGT |
| Landmark | TGAGTCTCCTTGATGCCCGAGCTCTCGGATGAATGGCAGATTTCTTTGAATGTTGCAGT |
| Mace     | TGAGTCTCCTTGATGCCCGAGCTCTCGGATGAATGGCAGATTTCTTTGAATGTTGCAGT |
| STANLEY  | TGAGTCTCCTTGATGCCCGAGCTCTCGGATGAATGGCAGATTTCTTTGAATGTTGCAGT |
|          | *****                                                       |

|          |                                                              |
|----------|--------------------------------------------------------------|
| Drysdale | TGGGTGAATGCGGTTAGGTTAGGTGGATGGTAAAAAGTAAAAACAACCTTCTATTCCAAA |
| RAC875   | TGGGTGAATGCGGTTAGGTTAGGTGGATGGTAAAAAGTAAAAACAACCTTCTATTCCAAA |
| Norin61  | TGGGTGAATGCGGTTAGGTTAGGTGGATGGTAAAAAGTAAAAACAACCTTCTATTCCAAA |
| Jagger   | TGGGTGAATGCGGTTAGGTTAGGTGGATGGTAAAAAGTAAAAACAACCTTCTATTCCAAA |
| Mattis   | TGGGTGAATGCGGTTAGGTTAGGTGGATGGTAAAAAGTAAAAACAACCTTCTATTCCAAA |
| Julius   | TGGGTGAATGCGGTTAGGTTAGGTGGATGGTAAAAAGTAAAAACAACCTTCTATTCCAAA |
| Arina    | TGGGTGAATGCGGTTAGGTTAGGTGGATGGTAAAAAGTAAAAACAACCTTCTATTCCAAA |
| Spelta   | TGGGTGAATGCGGTTAGGTTAGGTGGATGGTAAAAAGTAAAAACAACCTTCTATTCCAAA |
| Lancer   | TGGGTGAATGCGGTTAGGTTAGGTGGATGGTAAAAAGTAAAAACAACCTTCTATTCCAAA |
| Gladius  | NNNNNNNNNNNNNNNNNNNNNNNNNNNNNNNNNNNNNNNNNNNNNNNNNNNNNNNNNNNN |
| Kukri    | TGGGTGAATGCGGTTAGGTTAGGTGGATGGTAAAAAGTAAAAACAACCTTCTATTCCAAA |
| Landmark | TGGGTGAATGCGGTTAGGTTAGGTGGATGGTAAAAAGTAAAAACAACCTTCTATTCCAAA |
| Mace     | TGGGTGAATGCGGTTAGGTTAGGTGGATGGTAAAAAGTAAAAACAACCTTCTATTCCAAA |
| STANLEY  | TGGGTGAATGCGGTTAGGTTAGGTGGATGGTAAAAAGTAAAAACAACCTTCTATTCCAAA |

Drysdale GTCTGAACCCGTCAAATCTGGCTATGGGCACGGCCCCATCTCATCAGAGACCCACCAG  
RAC875 GTCTGAACCCGTCAAATCTGGCTATGGGCACGGCCCCATCTCATCAGAGACCCACCAG  
Norin61 GTCTGAACCCGTCAAATCTGGCTATGGGCACGGCCCCATCTCATCAGAGACCCACCAG  
Jagger GTCTGAACCCGTCAAATCTGGCTATGGGCACGGCCCCATCTCATCAGAGACCCACCAG  
Mattis GTCTGAACCCGTCAAATCTGGCTATGGGCACGGCCCCATCTCATCAGAGACCCACCAG  
Julius GTCTGAACCCGTCAAATCTGGCTATGGGCACGGCCCCATCTCATCAGAGACCCACCAG  
Arina GTCTGAACCCGTCAAATCTGGCTATGGGCACGGCCCCATCTCATCAGAGACCCACCAG  
Spelta GTCTGAACCCGTCAAATCTGGCTATGGGCACGGCCCCATCTCATCAGAGACCCACCAG  
Lancer GTCTGAACCCGTCAAATCTGGCTATGGGCACGGCCCCATCTCATCAGAGACCCACCAG  
Gladius NNNNNNNNNNNNNNNNNNNNNNNNNNNNNNNNNNNNNNNNNNNNNNNNNNNNNNNNNNNNN  
Kukri GTCTGAACCCGTCAAATCTGGCTATGGGCACGGCCCCATCTCATCAGAGACCCACCAG  
Landmark GTCTGAACCCGTCAAATCTGGCTATGGGCACGGCCCCATCTCATCAGAGACCCACCAG  
Mace GTCTGAACCCGTCAAATCTGGCTATGGGCACGGCCCCATCTCATCAGAGACCCACCAG  
STANLEY GTCTGAACCCGTCAAATCTGGCTATGGGCACGGCCCCATCTCATCAGAGACCCACCAG

Drysdale ACCTCCTGTGACGGGGCTCGCACCCGATAACCATTTTGTATCGGATCCATAACCCCTTAACCC  
RAC875 ACCTCCTGTGACGGGGCTCGCACCCGATAACCATTTTGTATCGGATCCATAACCCCTTAACCC  
Norin61 ACCTCCTGTGACGGGGCTCGCACCCGATAACCATTTTGTATCGGATCCATAACCCCTTAACCC  
Jagger ACCTCCTGTGACGGGGCTCGCACCCGATAACCATTTTGTATCGGATCCATAACCCCTTAACCC  
Mattis ACCTCCTGTGACGGGGCTCGCACCCGATAACCATTTTGTATCGGATCCATAACCCCTTAACCC  
Julius ACCTCCTGTGACGGGGCTCGCACCCGATAACCATTTTGTATCGGATCCATAACCCCTTAACCC  
Arina ACCTCCTGTGACGGGGCTCGCACCCGATAACCATTTTGTATCGGATCCATAACCCCTTAACCC  
Spelta ACCTCCTGTGACGGGGCTCGCACCCGATAACCATTTTGTATCGGATCCATAACCCCTTAACCC  
Lancer ACCTCCTGTGACGGGGCTCGCACCCGATAACCATTTTGTATCGGATCCATAACCCCTTAACCC  
Gladius NNNNNNNNNNNNNNNNNNNNNNNNNNNNNNNNNNNNNNNNNNNNNNNNNNNNNNNNNNNNN  
Kukri ACCTCCTGTGACGGGGCTCGCACCCGATAACCATTTTGTATCGGATCCATAACCCCTTAACCC  
Landmark ACCTCCTGTGACGGGGCTCGCACCCGATAACCATTTTGTATCGGATCCATAACCCCTTAACCC  
Mace ACCTCCTGTGACGGGGCTCGCACCCGATAACCATTTTGTATCGGATCCATAACCCCTTAACCC  
STANLEY ACCTCCTGTGACGGGGCTCGCACCCGATAACCATTTTGTATCGGATCCATAACCCCTTAACCC

Drysdale CCTTGACCTCACCTTCGCTCACAAGCGCCAGTACACAGAGCAGAGAGCCGCCCGCTGAG  
RAC875 CCTTGACCTCACCTTCGCTCACAAGCGCCAGTACACAGAGCAGAGAGCCGCCCGCTGAG  
Norin61 CCTTGACCTCACCTTCGCTCACAAGCGCCAGTACACAGAGCAGAGAGCCGCCCGCTGAG  
Jagger CCTTGACCTCACCTTCGCTCACAAGCGCCAGTACACAGAGCAGAGAGCCGCCCGCTGAG  
Mattis CCTTGACCTCACCTTCGCTCACAAGCGCCAGTACACAGAGCAGAGAGCCGCCCGCTGAG  
Julius CCTTGACCTCACCTTCGCTCACAAGCGCCAGTACACAGAGCAGAGAGCCGCCCGCTGAG  
Arina CCTTGACCTCACCTTCGCTCACAAGCGCCAGTACACAGAGCAGAGAGCCGCCCGCTGAG  
Spelta CCTTGACCTCACCTTCGCTCACAAGCGCCAGTACACAGAGCAGAGAGCCGCCCGCTGAG  
Lancer CCTTGACCTCACCTTCGCTCACAAGCGCCAGTACACAGAGCAGAGAGCCGCCCGCTGAG  
Gladius NNNNNNNNNNNNNNNNNNNNNNNNNNNNNNNNNNNNNNNNNNNNNNNNNNNNNNNNNNNNN  
Kukri CCTTGACCTCACCTTCGCTCACAAGCGCCAGTACACAGAGCAGAGAGCCGCCCGCTGAG  
Landmark CCTTGACCTCACCTTCGCTCACAAGCGCCAGTACACAGAGCAGAGAGCCGCCCGCTGAG  
Mace CCTTGACCTCACCTTCGCTCACAAGCGCCAGTACACAGAGCAGAGAGCCGCCCGCTGAG  
STANLEY CCTTGACCTCACCTTCGCTCACAAGCGCCAGTACACAGAGCAGAGAGCCGCCCGCTGAG

Drysdale TGCTACCCGCCGCTGCTGGTGCCAACAGACAG----CCGCCCGCCCGCCGCCCGCTGA  
RAC875 TGCTACCCGCCGCTGCTGGTGCCAACAGACAG----CCGCCCGCCCGCCGCCCGCTGA  
Norin61 TGCTACCCGCCGCTGCTGGTGCCAACAGACAG----CCGCCCGCCCGCCGCCCGCTGA  
Jagger TGCTACCCGCCGCTGCTGGTGCCAACAGACAG----CCGCCCGCCCGCCGCCCGCTGA  
Mattis TGCTACCCGCCGCTGCTGGTGCCAACAGACAG----CCGCCCGCCCGCCGCCCGCTGA  
Julius TGCTACCCGCCGCTGCTGGTGCCAACAGACAG----CCGCCCGCCCGCCGCCCGCTGA  
Arina TGCTACCCGCCGCTGCTGGTGCCAACAGACAG----CCGCCCGCCCGCCGCCCGCTGA  
Spelta TGCTACCCGCCGCTGCTGGTGCCAACAGACAG----CCGCCCGCCCGCCGCCCGCTGA  
Lancer TGCTACCCGCCGCTGCTGGTGCCAACAGACAG----CCGCCCGCCCGCCGCCCGCTGA  
Gladius NNNNNNNNNNNNNNNNNNNNNNNNNNNNNNNNNNNNNNNNNNNNNNNNNNNNNNNNNNNNN  
Kukri TGCTACCCGCCGCTGCTGGTGCCAACAGACAG----CCGCCCGCCCGCCGCCCGCTGA  
Landmark TGCTACCCGCCGCTGCTGGTGCCAACAGACAG----CCGCCCGCCCGCCGCCCGCTGA  
Mace TGCTACCCGCCGCTGCTGGTGCCAACAGACAG----CCGCCCGCCCGCCGCCCGCTGA  
STANLEY TGCTACCCGCCGCTGCTGGTGCCAACAGACAG----CCGCCCGCCCGCCGCCCGCTGA

+1

Drysdale CTGAATCTTGGTGGGGGAGGAGAGGAGAGATGGCCCTCGGCGGCGGCGGCGGAGAGGGGA  
RAC875 CTGAATCTTGGTGGGGGAGGAGAGGAGAGATGGCCCTCGGCGGCGGCGGCGGAGAGGGGA  
Norin61 CTGAATCTTGGTGGGGGAGGAGAGGAGAGATGGCCCTCGGCGGCGGCGGCGGAGAGGGGA  
Jagger CTGAATCTTGGTGGGGGAGGAGAGGAGAGATGGCCCTCGGCGGCGGCGGCGGAGAGGGGA  
Mattis CTGAATCTTGGTGGGGGAGGAGAGGAGAGATGGCCCTCGGCGGCGGCGGCGGAGAGGGGA  
Julius CTGAATCTTGGTGGGGGAGGAGAGGAGAGATGGCCCTCGGCGGCGGCGGCGGAGAGGGGA  
Arina CTGAATCTTGGTGGGGGAGGAGAGGAGAGATGGCCCTCGGCGGCGGCGGCGGAGAGGGGA  
Spelta CTGAATCTTGGTGGGGGAGGAGAGGAGAGATGGCCCTCGGCGGCGGCGGCGGAGAGGGGA  
Lancer CTGAATCTTGGTGGGGGAGGAGAGGAGAGATGGCCCTCGGCGGCGGCGGCGGAGAGGGGA  
Gladius NNNNNNNNNNNNNNNNNNNNNNNNNNNNNNNNNNNNNNNNNNNNNNNNNNNNNNNNNNNNN  
Kukri CTGAATCTTGGTGGGGGAGGAGAGGAGAGATGGCCCTCGGCGGCGGCGGCGGAGAGGGGA  
Landmark CTGAATCTTGGTGGGGGAGGAGAGGAGAGATGGCCCTCGGCGGCGGCGGCGGAGAGGGGA  
Mace CTGAATCTTGGTGGGGGAGGAGAGGAGAGATGGCCCTCGGCGGCGGCGGCGGAGAGGGGA  
STANLEY CTGAATCTTGGTGGGGGAGGAGAGGAGAGATGGCCCTCGGCGGCGGCGGCGGAGAGGGGA

Drysdale TCCTGGCCGTGGCCGTGGTGCCCATGGAGGCCATCCCCATGGCGGAGCCGAGATCCTCG  
RAC875 TCCTGGCCGTGGCCGTGGTGCCCATGGAGGCCATCCCCATGGCGGAGCCGAGATCCTCG  
Norin61 TCCTGGCCGTGGCCGTGGTGCCCATGGAGGCCATCCCCATGGCGGAGCCGAGATCCTCG  
Jagger TCCTGGCCGTGGCCGTGGTGCCCATGGAGGCCATCCCCATGGCGGAGCCGAGATCCTCG  
Mattis TCCTGGCCGTGGCCGTGGTGCCCATGGAGGCCATCCCCATGGCGGAGCCGAGATCCTCG  
Julius TCCTGGCCGTGGCCGTGGTGCCCATGGAGGCCATCCCCATGGCGGAGCCGAGATCCTCG  
Arina TCCTGGCCGTGGCCGTGGTGCCCATGGAGGCCATCCCCATGGCGGAGCCGAGATCCTCG  
Spelta TCCTGGCCGTGGCCGTGGTGCCCATGGAGGCCATCCCCATGGCGGAGCCGAGATCCTCG  
Lancer TCCTGGCCGTGGCCGTGGTGCCCATGGAGGCCATCCCCATGGCGGAGCCGAGATCCTCG  
Gladius NNNNNNNNNNNNNNNNNNNNNNNNNNNNNNNNNNNNNNNNNNNNNNNNNNNNNNNNNNNNN  
Kukri TCCTGGCCGTGGCCGTGGTGCCCATGGAGGCCATCCCCATGGCGGAGCCGAGATCCTCG  
Landmark TCCTGGCCGTGGCCGTGGTGCCCATGGAGGCCATCCCCATGGCGGAGCCGAGATCCTCG  
Mace TCCTGGCCGTGGCCGTGGTGCCCATGGAGGCCATCCCCATGGCGGAGCCGAGATCCTCG  
STANLEY TCCTGGCCGTGGCCGTGGTGCCCATGGAGGCCATCCCCATGGCGGAGCCGAGATCCTCG

Drysdale CCGGCGGCAAGACCGTCGGCCTGCGGGCGGACCTGCTCGACTGCCACAACCTGCCGCTCC  
RAC875 CCGGCGGCAAGACCGTCGGCCTGCGGGCGGACCTGCTCGACTGCCACAACCTGCCGCTCC  
Norin61 CCGGCGGCAAGACCGTCGGCCTGCGGGCGGACCTGCTCGACTGCCACAACCTGCCGCTCC  
Jagger CCGGCGGCAAGACCGTCGGCCTGCGGGCGGACCTGCTCGACTGCCACAACCTGCCGCTCC  
Mattis CCGGCGGCAAGACCGTCGGCCTGCGGGCGGACCTGCTCGACTGCCACAACCTGCCGCTCC  
Julius CCGGCGGCAAGACCGTCGGCCTGCGGGCGGACCTGCTCGACTGCCACAACCTGCCGCTCC  
Arina CCGGCGGCAAGACCGTCGGCCTGCGGGCGGACCTGCTCGACTGCCACAACCTGCCGCTCC  
Spelta CCGGCGGCAAGACCGTCGGCCTGCGGGCGGACCTGCTCGACTGCCACAACCTGCCGCTCC  
Lancer CCGGCGGCAAGACCGTCGGCCTGCGGGCGGACCTGCTCGACTGCCACAACCTGCCGCTCC  
Gladius NNNNNNNNAGACCGTCGGCCTGCGGGCGGACCTGCTCGACTGCCACAACCTGCCGCTCC  
Kukri CCGGCGGCAAGACCGTCGGCCTGCGGGCGGACCTGCTCGACTGCCACAACCTGCCGCTCC  
Landmark CCGGCGGCAAGACCGTCGGCCTGCGGGCGGACCTGCTCGACTGCCACAACCTGCCGCTCC  
Mace CCGGCGGCAAGACCGTCGGCCTGCGGGCGGACCTGCTCGACTGCCACAACCTGCCGCTCC  
STANLEY CCGGCGGCAAGACCGTCGGCCTGCGGGCGGACCTGCTCGACTGCCACAACCTGCCGCTCC  
\*\*\*\*\*

v

Drysdale CCCTCAAGCCCCCATATTCAAGGTGAGATCCGCCGGCCGCCCTCTTCTCCAAGATTCA  
RAC875 CCCTCAAGCCCCCATATTCAAGGTGAGATCCGCCGGCCGCCCTCTTCTCCAAGATTCA  
Norin61 CCCTCAAGCCCCCATATTCAAGGTGAGATCCGCCGGCCGCCCTCTTCTCCAAGATTCA  
Jagger CCCTCAAGCCCCCATATTCAAGGTGAGATCCGCCGGCCGCCCTCTTCTCCAAGATTCA  
Mattis CCCTCAAGCCCCCATATTCAAGGTGAGATCCGCCGGCCGCCCTCTTCTCCAAGATTCA  
Julius CCCTCAAGCCCCCATATTCAAGGTGAGATCCGCCGGCCGCCCTCTTCTCCAAGATTCA  
Arina CCCTCAAGCCCCCATATTCAAGGTGAGATCCGCCGGCCGCCCTCTTCTCCAAGATTCA  
Spelta CCCTCAAGCCCCCATATTCAAGGTGAGATCCGCCGGCCGCCCTCTTCTCCAAGATTCA  
Lancer CCCTCAAGCCCCCATATTCAAGGTGAGATCCGCCGGCCGCCCTCTTCTCCAAGATTCA  
Gladius CCCTCAAGCCCCCATATTCAAGGTGAGATCCGCCGGCCGCCCTCTTCCCAAGATTCA  
Kukri CCCTCAAGCCCCCATATTCAAGGTGAGATCCGCCGGCCGCCCTCTTCCCAAGATTCA  
Landmark CCCTCAAGCCCCCATATTCAAGGTGAGATCCGCCGGCCGCCCTCTTCCCAAGATTCA  
Mace CCCTCAAGCCCCCATATTCAAGGTGAGATCCGCCGGCCGCCCTCTTCCCAAGATTCA  
STANLEY CCCTCAAGCCCCCATATTCAAGGTGAGATCCGCCGGCCGCCCTCTTCCCAAGATTCA  
\*\*\*\*\*

Drysdale TTTTTCGGTTTTCTTGAATCTGGCACGGCGTGACCGAGCGTATCTGGTGTGCATGAATCT  
RAC875 TTTTTCGGTTTTCTTGAATCTGGCACGGCGTGACCGAGCGTATCTGGTGTGCATGAATCT  
Norin61 TTTTTCGGTTTTCTTGAATCTGGCACGGCGTGACCGAGCGTATCTGGTGTGCATGAATCT  
Jagger TTTTTCGGTTTTCTTGAATCTGGCACGGCGTGACCGAGCGTATCTGGTGTGCATGAATCT  
Mattis TTTTTCGGTTTTCTTGAATCTGGCACGGCGTGACCGAGCGTATCTGGTGTGCATGAATCT  
Julius TTTTTCGGTTTTCTTGAATCTGGCACGGCGTGACCGAGCGTATCTGGTGTGCATGAATCT  
Arina TTTTTCGGTTTTCTTGAATCTGGCACGGCGTGACCGAGCGTATCTGGTGTGCATGAATCT  
Spelta TTTTTCGGTTTTCTTGAATCTGGCACGGCGTGACCGAGCGTATCTGGTGTGCATGAATCT  
Lancer TTTTTCGGTTTTCTTGAATCTGGCACGGCGTGACCGAGCGTATCTGGTGTGCATGAATCT  
Gladius TTTTTCGGTTTTCTTGAATCTGGCACGGCGTGACCGAGCGTATCTGGTGTGCATGAATCT  
Kukri TTTTTCGGTTTTCTTGAATCTGGCACGGCGTGACCGAGCGTATCTGGTGTGCATGAATCT  
Landmark TTTTTCGGTTTTCTTGAATCTGGCACGGCGTGACCGAGCGTATCTGGTGTGCATGAATCT  
Mace TTTTTCGGTTTTCTTGAATCTGGCACGGCGTGACCGAGCGTATCTGGTGTGCATGAATCT  
STANLEY TTTTTCGGTTTTCTTGAATCTGGCACGGCGTGACCGAGCGTATCTGGTGTGCATGAATCT  
\*\*\*\*\*

Drysdale TGGCCGGCAGTGCGACGCCGAGCACCTGGTCTGCTCCTCCTGCCGCGGGCGCCACGCCGA  
RAC875 TGGCCGGCAGTGCGACGCCGAGCACCTGGTCTGCTCCTCCTGCCGCGGGCGCCACGCCGA  
Norin61 TGGCCGGCAGTGCGACGCCGAGCACCTGGTCTGCTCCTCCTGCCGCGGGCGCCACGCCGA  
Jagger TGGCCGGCAGTGCGACGCCGAGCACCTGGTCTGCTCCTCCTGCCGCGGGCGCCACGCCGA  
Mattis TGGCCGGCAGTGCGACGCCGAGCACCTGGTCTGCTCCTCCTGCCGCGGGCGCCACGCCGA  
Julius TGGCCGGCAGTGCGACGCCGAGCACCTGGTCTGCTCCTCCTGCCGCGGGCGCCACGCCGA  
Arina TGGCCGGCAGTGCGACGCCGAGCACCTGGTCTGCTCCTCCTGCCGCGGGCGCCACGCCGA  
Spelta TGGCCGGCAGTGCGACGCCGAGCACCTGGTCTGCTCCTCCTGCCGCGGGCGCCACGCCGA  
Lancer TGGCCGGCAGTGCGACGCCGAGCACCTGGTCTGCTCCTCCTGCCGCGGGCGCCACGCCGA  
Gladius TGGCCGGCAGTGCGACGCCGAGCACCTGGTCTGCTCCTCCTGCCGCGGGCGCCACGCCGA  
Kukri TGGCCGGCAGTGCGACGCCGAGCACCTGGTCTGCTCCTCCTGCCGCGGGCGCCACGCCGA  
Landmark TGGCCGGCAGTGCGACGCCGAGCACCTGGTCTGCTCCTCCTGCCGCGGGCGCCACGCCGA  
Mace TGGCCGGCAGTGCGACGCCGAGCACCTGGTCTGCTCCTCCTGCCGCGGGCGCCACGCCGA  
STANLEY TGGCCGGCAGTGCGACGCCGAGCACCTGGTCTGCTCCTCCTGCCGCGGGCGCCACGCCGA  
\*\*\*\*\*

Drysdale GGCTGCGGGCGCCGCGCCGCCGTCCACTCCGCGCTCGCCGACATCTTCGCGGCCGCCGC  
RAC875 GGCTGCGGGCGCCGCGCCGCCGTCCACTCCGCGCTCGCCGACATCTTCGCGGCCGCCGC  
Norin61 GGCTGCGGGCGCCGCGCCGCCGTCCACTCCGCGCTCGCCGACATCTTCGCGGCCGCCGC  
Jagger GGCTGCGGGCGCCGCGCCGCCGTCCACTCCGCGCTCGCCGACATCTTCGCGGCCGCCGC  
Mattis GGCTGCGGGCGCCGCGCCGCCGTCCACTCCGCGCTCGCCGACATCTTCGCGGCCGCCGC  
Julius GGCTGCGGGCGCCGCGCCGCCGTCCACTCCGCGCTCGCCGACATCTTCGCGGCCGCCGC  
Arina GGCTGCGGGCGCCGCGCCGCCGTCCACTCCGCGCTCGCCGACATCTTCGCGGCCGCCGC  
Spelta GGCTGCGGGCGCCGCGCCGCCGTCCACTCCGCGCTCGCCGACATCTTCGCGGCCGCCGC  
Lancer GGCTGCGGGCGCCGCGCCGCCGTCCACTCCGCGCTCGCCGACATCTTCGCGGCCGCCGC  
Gladius GGCTGCGGGCGCCGCGCCGCCGTCCACTCCGCGCTCGCCGACATCTTCGCGGCCGCCGC  
Kukri GGCTGCGGGCGCCGCGCCGCCGTCCACTCCGCGCTCGCCGACATCTTCGCGGCCGCCGC  
Landmark GGCTGCGGGCGCCGCGCCGCCGTCCACTCCGCGCTCGCCGACATCTTCGCGGCCGCCGC  
Mace GGCTGCGGGCGCCGCGCCGCCGTCCACTCCGCGCTCGCCGACATCTTCGCGGCCGCCGC  
STANLEY GGCTGCGGGCGCCGCGCCGCCGTCCACTCCGCGCTCGCCGACATCTTCGCGGCCGCCGC  
\*\*\*\*\*

v

Drysdale CACCGTGCCCTGCGGCTACGAGCGCTACGGCTGCGACGCCGGCGGGCGTGGTGTACCACGA  
RAC875 CACCGTGCCCTGCGGCTACGAGCGCTACGGCTGCGACGCCGGCGGGCGTGGTGTACCACGA  
Norin61 CACCGTGCCCTGCGGCTACGAGCGCTACGGCTGCGACGCCGGCGGGCGTGGTGTACCACGA  
Jagger CACCGTGCCCTGCGGCTACGAGCGCTACGGCTGCGACGCCGGCGGGCGTGGTGTACCACGA  
Mattis CACCGTGCCCTGCGGCTACGAGCGCTACGGCTGCGACGCCGGCGGGCGTGGTGTACCACGA  
Julius CACCGTGCCCTGCGGCTACGAGCGCTACGGCTGCGACGCCGGCGGGCGTGGTGTACCACGA  
Arina CACCGTGCCCTGCGGCTACGAGCGCTACGGCTGCGACGCCGGCGGGCGTGGTGTACCACGA  
Spelta CACCGTGCCCTGCGGCTACGAGCGCTACGGCTGCGACGCCGGCGGGCGTGGTGTACCACGA  
Lancer CACCGTGCCCTGCGGCTACGAGCGCTACGGCTGCGACGCCGGCGGGCGTGGTGTACCACGA  
Gladius CACCGTGCCCTGCGGCTACGAGCGCTACGGCTGCGACGCCGGCGGGCGTGGTGTACCACGA  
Kukri CACCGTGCCCTGCGGCTACGAGCGCTACGGCTGCGACGCCGGCGGGCGTGGTGTACCACGA  
Landmark CACCGTGCCCTGCGGCTACGAGCGCTACGGCTGCGACGCCGGCGGGCGTGGTGTACCACGA  
Mace CACCGTGCCCTGCGGCTACGAGCGCTACGGCTGCGACGCCGGCGGGCGTGGTGTACCACGA  
STANLEY CACCGTGCCCTGCGGCTACGAGCGCTACGGCTGCGACGCCGGCGGGCGTGGTGTACCACGA  
\*\*\*\*\*

v

Drysdale GGCCGCGGACCACCGGCGCGGTGCCAGCACGCGCCCTGCTGCTGCCCGGACCGCGCGGG  
RAC875 GGCCGCGGACCACCGGCGCGGTGCCAGCACGCGCCCTGCTGCTGCCCGGACCGCGCGGG  
Norin61 GGCCGCGGACCACCGGCGCGGTGCCAGCACGCGCCCTGCTGCTGCCCGGACCGCGCGGG  
Jagger GGCCGCGGACCACCGGCGCGGTGCCAGCACGCGCCCTGCTGCTGCCCGGACCGCGCGGG  
Mattis GGCCGCGGACCACCGGCGCGGTGCCAGCACGCGCCCTGCTGCTGCCCGGACCGCGCGGG  
Julius GGCCGCGGACCACCGGCGCGGTGCCAGCACGCGCCCTGCTGCTGCCCGGACCGCGCGGG  
Arina GGCCGCGGACCACCGGCGCGGTGCCAGCACGCGCCCTGCTGCTGCCCGGACCGCGCGGG  
Spelta GGCCGCGGACCACCGGCGCGGTGCCAGCACGCGCCCTGCTGCTGCCCGGACCGCGCGGG  
Lancer GGCGGCGGACCACCGGCGCGGTGCCAGCACGCGCCCTGCTGCTGCCCGGACCGCGCGGG  
Gladius GGCGGCGGACCACCGGCGCGGTGCCAGCACGCGCCCTGCTGCTGCCCGGACCGCGCGGG  
Kukri GGCGGCGGACCACCGGCGCGGTGCCAGCACGCGCCCTGCTGCTGCCCGGACCGCGCGGG  
Landmark GGCGGCGGACCACCGGCGCGGTGCCAGCACGCGCCCTGCTGCTGCCCGGACCGCGCGGG  
Mace GGCGGCGGACCACCGGCGCGGTGCCAGCACGCGCCCTGCTGCTGCCCGGACCGCGCGGG  
STANLEY GGCGGCGGACCACCGGCGCGGTGCCAGCACGCGCCCTGCTGCTGCCCGGACCGCGCGGG  
\*\*\* \*\*\*\*\*

Drysdale CGCGGCCGGCATCGGGGGCTGCGGCTTCGTGCGGCTCCCGCCAGGACCTGCTCGACCACAT  
RAC875 CGCGGCCGGCATCGGGGGCTGCGGCTTCGTGCGGCTCCCGCCAGGACCTGCTCGACCACAT  
Norin61 CGCGGCCGGCATCGGGGGCTGCGGCTTCGTGCGGCTCCCGCCAGGACCTGCTCGACCACAT  
Jagger CGCGGCCGGCATCGGGGGCTGCGGCTTCGTGCGGCTCCCGCCAGGACCTGCTCGACCACAT  
Mattis CGCGGCCGGCATCGGGGGCTGCGGCTTCGTGCGGCTCCCGCCAGGACCTGCTCGACCACAT  
Julius CGCGGCCGGCATCGGGGGCTGCGGCTTCGTGCGGCTCCCGCCAGGACCTGCTCGACCACAT  
Arina CGCGGCCGGCATCGGGGGCTGCGGCTTCGTGCGGCTCCCGCCAGGACCTGCTCGACCACAT  
Spelta CGCGGCCGGCATCGGGGGCTGCGGCTTCGTGCGGCTCCCGCCAGGACCTGCTCGACCACAT  
Lancer CGCGGCCGGCATCGGGGGCTGCGGCTTCGTGCGGCTCCCGCCAGGACCTGCTCGACCACAT  
Gladius CGCGGCCGGCATCGGGGGCTGCGGCTTCGTGCGGCTCCCGCCAGGACCTGCTCGACCACAT  
Kukri CGCGGCCGGCATCGGGGGCTGCGGCTTCGTGCGGCTCCCGCCAGGACCTGCTCGACCACAT  
Landmark CGCGGCCGGCATCGGGGGCTGCGGCTTCGTGCGGCTCCCGCCAGGACCTGCTCGACCACAT  
Mace CGCGGCCGGCATCGGGGGCTGCGGCTTCGTGCGGCTCCCGCCAGGACCTGCTCGACCACAT  
STANLEY CGCGGCCGGCATCGGGGGCTGCGGCTTCGTGCGGCTCCCGCCAGGACCTGCTCGACCACAT  
\*\*\*\*\*

v

Drysdale CTCCGGCCCCGACCACCTCGCGCCCCATCATCGTTCGCTACGGCCAGCCGTGGAACCT  
RAC875 CTCCGGCCCCGACCACCTCGCGCCCCATCATCGTTCGCTACGGCCAGCCGTGGAACCT  
Norin61 CTCCGGCCCCGACCACCTCGCGCCCCATCATCGTTCGCTACGGCCAGCCGTGGAACCT  
Jagger CTCCGGCCCCGACCACCTCGCGCCCCATCATCGTTCGCTACGGCCAGCCGTGGAACCT  
Mattis CTCCGGCCCCGACCACCTCGCGCCCCATCATCGTTCGCTACGGCCAGCCGTGGAACCT  
Julius CTCCGGCCCCGACCACCTCGCGCCCCATCATCGTTCGCTACGGCCAGCCGTGGAACCT  
Arina CTCCGGCCCCGACCACCTCGCGCCCCATCATCGTTCGCTACGGCCAGCCGTGGAACCT  
Spelta CTCCGGCCCCGACCACCTCGCGCCCCATCATCGTTCGCTACGGCCAGCCGTGGAACCT  
Lancer CTCCGGCCCCGACCACCTCGCGCCCCATCATCGTTCGCTACGGCCAGCCGTGGAACCT  
Gladius CTCCGGCCCCGACCACCTCGCGCCCCATCATCGTTCGCTACGGCCAGCCGTGGAACCT  
Kukri CTCCGGCCCCGACCACCTCGCGCCCCATCATCGTTCGCTACGGCCAGCCGTGGAACCT  
Landmark CTCCGGCCCCGACCACCTCGCGCCCCATCATCGTTCGCTACGGCCAGCCGTGGAACCT  
Mace CTCCGGCCCCGACCACCTCGCGCCCCATCATCGTTCGCTACGGCCAGCCGTGGAACCT  
STANLEY CTCCGGCCCCGACCACCTCGCGCCCCATCATCGTTCGCTACGGCCAGCCGTGGAACCT  
\*\*\*\*\* \*\*\*\*\*

v

Drysdale CAGCCTGCCGCTCTCGCGCCGCTGGCACATCCTCGTCCGCGAGGAGGACAAGGCGGTGGC  
RAC875 CAGCCTGCCGCTCTCGCGCCGCTGGCACATCCTCGTCCGCGAGGAGGACAAGGCGGTGGC  
Norin61 CAGCCTGCCGCTCTCGCGCCGCTGGCACATCCTCGTCCGCGAGGAGGACAAGGCGGTGGC  
Jagger CAGCCTGCCGCTCTCGCGCCGCTGGCACATCCTCGTCCGCGAGGAGGACAAGGCGGTGGC  
Mattis CAGCCTGCCGCTCTCGCGCCGCTGGCACATCCTCGTCCGCGAGGAGGACAAGGCGGTGGC  
Julius CAGCCTGCCGCTCTCGCGCCGCTGGCACATCCTCGTCCGCGAGGAGGACAAGGCGGTGGC  
Arina CAGCCTGCCGCTCTCGCGCCGCTGGCACATCCTCGTCCGCGAGGAGGACAAGGCGGTGGC  
Spelta CAGCCTGCCGCTCTCGCGCCGCTGGCACATCCTCGTCCGCGAGGAGGACAAGGCGGTGGC  
Lancer CAGCCTGCCGCTCTCGCGCCGCTGGCACATCCTCGTCCGCGAGGAGGACAAGGCGGTGGC  
Gladius CAGCCTGCCGCTCTCGCGCCGCTGGCACATCCTCGTCCGCGAGGAGGACAAGGCGGTGGC  
Kukri CAGCCTGCCGCTCTCGCGCCGCTGGCACATCCTCGTCCGCGAGGAGGACAAGGCGGTGGC  
Landmark CAGCCTGCCGCTCTCGCGCCGCTGGCACATCCTCGTCCGCGAGGAGGACAAGGCGGTGGC  
Mace CAGCCTGCCGCTCTCGCGCCGCTGGCACATCCTCGTCCGCGAGGAGGACAAGGCGGTGGC  
STANLEY CAGCCTGCCGCTCTCGCGCCGCTGGCACATCCTCGTCCGCGAGGAGGACAAGGCGGTGGC  
\*\*\*\*\* \*\*\*\*\*

Drysdale CGCCGCCGCGGGCGCCGACCGGCACCGCAACCTCTTCCTCGTCTCCCTCGGCGAGCGCGG  
RAC875 CGCCGCCGCGGGCGCCGACCGGCACCGCAACCTCTTCCTCGTCTCCCTCGGCGAGCGCGG  
Norin61 CGCCGCCGCGGGCGCCGACCGGCACCGCAACCTCTTCCTCGTCTCCCTCGGCGAGCGCGG  
Jagger CGCCGCCGCGGGCGCCGACCGGCACCGCAACCTCTTCCTCGTCTCCCTCGGCGAGCGCGG  
Mattis CGCCGCCGCGGGCGCCGACCGGCACCGCAACCTCTTCCTCGTCTCCCTCGGCGAGCGCGG  
Julius CGCCGCCGCGGGCGCCGACCGGCACCGCAACCTCTTCCTCGTCTCCCTCGGCGAGCGCGG  
Arina CGCCGCCGCGGGCGCCGACCGGCACCGCAACCTCTTCCTCGTCTCCCTCGGCGAGCGCGG  
Spelta CGCCGCCGCGGGCGCCGACCGGCACCGCAACCTCTTCCTCGTCTCCCTCGGCGAGCGCGG  
Lancer CGCCGCCGCGGGCGCCGACCGGCACCGCAACCTCTTCCTCGTCTCCCTCGGCGAGCGCGG  
Gladius CGCCGCCGCGGGCGCCGACCGGCACCGCAACCTCTTCCTCGTCTCCCTCGGCGAGCGCGG  
Kukri CGCCGCCGCGGGCGCCGACCGGCACCGCAACCTCTTCCTCGTCTCCCTCGGCGAGCGCGG  
Landmark CGCCGCCGCGGGCGCCGACCGGCACCGCAACCTCTTCCTCGTCTCCCTCGGCGAGCGCGG  
Mace CGCCGCCGCGGGCGCCGACCGGCACCGCAACCTCTTCCTCGTCTCCCTCGGCGAGCGCGG  
STANLEY CGCCGCCGCGGGCGCCGACCGGCACCGCAACCTCTTCCTCGTCTCCCTCGGCGAGCGCGG  
\*\*\*\*\*

Drysdale CGCCACCACGGCCGTGTGCTGGTGTGCGTCCGGGCGGACGGCACGGCGCCGGGCGCGCC  
RAC875 CGCCACCACGGCCGTGTGCTGGTGTGCGTCCGGGCGGACGGCACGGCGCCGGGCGCGCC  
Norin61 CGCCACCACGGCCGTGTGCTGGTGTGCGTCCGGGCGGACGGCACGGCGCCGGGCGCGCC  
Jagger CGCCACCACGGCCGTGTGCTGGTGTGCGTCCGGGCGGACGGCACGGCGCCGGGCGCGCC  
Mattis CGCCACCACGGCCGTGTGCTGGTGTGCGTCCGGGCGGACGGCACGGCGCCGGGCGCGCC  
Julius CGCCACCACGGCCGTGTGCTGGTGTGCGTCCGGGCGGACGGCACGGCGCCGGGCGCGCC  
Arina CGCCACCACGGCCGTGTGCTGGTGTGCGTCCGGGCGGACGGCACGGCGCCGGGCGCGCC  
Spelta CGCCACCACGGCCGTGTGCTGGTGTGCGTCCGGGCGGACGGCACGGCGCCGGGCGCGCC  
Lancer CGCCACCACGGCCGTGTGCTGGTGTGCGTCCGGGCGGACGGCACGGCGCCGGGCGCGCC  
Gladius CGCCACCACGGCCGTGTGCTGGTGTGCGTCCGGGCGGACGGCACGGCGCCGGGCGCGCC  
Kukri CGCCACCACGGCCGTGTGCTGGTGTGCGTCCGGGCGGACGGCACGGCGCCGGGCGCGCC  
Landmark CGCCACCACGGCCGTGTGCTGGTGTGCGTCCGGGCGGACGGCACGGCGCCGGGCGCGCC  
Mace CGCCACCACGGCCGTGTGCTGGTGTGCGTCCGGGCGGACGGCACGGCGCCGGGCGCGCC  
STANLEY CGCCACCACGGCCGTGTGCTGGTGTGCGTCCGGGCGGACGGCACGGCGCCGGGCGCGCC  
\*\*\*\*\*

Drysdale GCAGTTCGCGTGCAAGCTCGCCGTGGAGAGCGACGGCTGCAGGCTGACCCTGGAGTCGCC  
RAC875 GCAGTTCGCGTGCAAGCTCGCCGTGGAGAGCGACGGCTGCAGGCTGACCCTGGAGTCGCC  
Norin61 GCAGTTCGCGTGCAAGCTCGCCGTGGAGAGCGACGGCTGCAGGCTGACCCTGGAGTCGCC  
Jagger GCAGTTCGCGTGCAAGCTCGCCGTGGAGAGCGACGGCTGCAGGCTGACCCTGGAGTCGCC  
Mattis GCAGTTCGCGTGCAAGCTCGCCGTGGAGAGCGACGGCTGCAGGCTGACCCTGGAGTCGCC  
Julius GCAGTTCGCGTGCAAGCTCGCCGTGGAGAGCGACGGCTGCAGGCTGACCCTGGAGTCGCC  
Arina GCAGTTCGCGTGCAAGCTCGCCGTGGAGAGCGACGGCTGCAGGCTGACCCTGGAGTCGCC  
Spelta GCAGTTCGCGTGCAAGCTCGCCGTGGAGAGCGACGGCTGCAGGCTGACCCTGGAGTCGCC  
Lancer GCAGTTCGCGTGCAAGCTCGCCGTGGAGAGCGACGGCTGCAGGCTGACCCTGGAGTCGCC  
Gladius GCAGTTCGCGTGCAAGCTCGCCGTGGAGAGCGACGGCTGCAGGCTGACCCTGGAGTCGCC  
Kukri GCAGTTCGCGTGCAAGCTCGCCGTGGAGAGCGACGGCTGCAGGCTGACCCTGGAGTCGCC  
Landmark GCAGTTCGCGTGCAAGCTCGCCGTGGAGAGCGACGGCTGCAGGCTGACCCTGGAGTCGCC  
Mace GCAGTTCGCGTGCAAGCTCGCCGTGGAGAGCGACGGCTGCAGGCTGACCCTGGAGTCGCC  
STANLEY GCAGTTCGCGTGCAAGCTCGCCGTGGAGAGCGACGGCTGCAGGCTGACCCTGGAGTCGCC  
\*\*\*\*\*

V

v

Drysdale TCTGGTGTGCAGCAGCTCCCTGTCCGGCGGCCGTGCCGGGCGAGGTCAAGTGCCTGCCGGT  
RAC875 TCTGGTGTGCAGCAGCTCCCTGTCCGGCGGCCGTGCCGGGCGAGGTCAAGTGCCTGCCGGT  
Norin61 TCTGGTGTGCAGCAGCTCCCTGTCCGGCGGCCGTGCCGGGCGAGGTCAAGTGCCTGCCGGT  
Jagger TCTGGTGTGCAGCAGCTCCCTGTCCGGCGGCCGTGCCGGGCGAGGTCAAGTGCCTGCCGGT  
Mattis TCTGGTGTGCAGCAGCTCCCTGTCCGGCGGCCGTGCCGGGCGAGGTCAAGTGCCTGCCGGT  
Julius TCTGGTGTGCAGCAGCTCCCTGTCCGGCGGCCGTGCCGGGCGAGGTCAAGTGCCTGCCGGT  
Arina TCTGGTGTGCAGCAGCTCCCTGTCCGGCGGCCGTGCCGGGCGAGGTCAAGTGCCTGCCGGT  
Spelta TCTGGTGTGCAGCAGCTCCCTGTCCGGCGGCCGTGCCGGGCGAGGTCAAGTGCCTGCCGGT  
Lancer GCTGGTGTGCAGCAGCTCCCTGTCCGGCGGCCGTGCCGGGCGAGGTCAAGTGCCTGCCGGT  
Gladius GCTGGTGTGCAGCAGCTCCCTGTCCGGCGGCCGTGCCGGGCGAGGTCAAGTGCCTGCCGGT  
Kukri GCTGGTGTGCAGCAGCTCCCTGTCCGGCGGCCGTGCCGGGCGAGGTCAAGTGCCTGCCGGT  
Landmark GCTGGTGTGCAGCAGCTCCCTGTCCGGCGGCCGTGCCGGGCGAGGTCAAGTGCCTGCCGGT  
Mace GCTGGTGTGCAGCAGCTCCCTGTCCGGCGGCCGTGCCGGGCGAGGTCAAGTGCCTGCCGGT  
STANLEY GCTGGTGTGCAGCAGCTCCCTGTCCGGCGGCCGTGCCGGGCGAGGTCAAGTGCCTGCCGGT  
\*\*\*\*\*





Stop

Drysdale -----  
RAC875 -----  
Norin61 GTCCGCCAACCCAAGGAAGCTGTAGGGAGGACGCCGATGGGCTGGAGTAGC-ACGATGAT  
Jagger GTCCGCCAACCCAAGGAAGCTGTAGGGAGGACGCCGATGGGCTGGAGTAGC-ACGATGAT  
Mattis GTCCGCCAACCCAAGGAAGCTGTAGGGAGGACGCCGATGGGCTGGAGTAGC-ACGATGAT  
Julius GTCCGCCAACCCAAGGAAGCTGTAGGGAGGACGCCGATGGGCTGGAGTAGC-ACGATGAT  
Arina GTCCGCCAACCCAAGGAAGCTGTAGGGAGGACGCCGATGGGCTGGAGTAGC-ACGATGAT  
Spelta GTCCGCCAACCCAAGGAAGCTGTAGGGAGGACGCCGATGGGCTGGAGTAGC-ACGATGAT  
Lancer GTCTGCCAACCCAAGGAAGCTGTAGGGAGGACGCTGATGGTCTGGGTCGACTACGATGAT  
Gladius -----  
Kukri -----  
Landmark GTCTGCCAACCCAAGGAAGCTGTAGGGAGGACGCTGATGGTCTGGGTCGACTACGATGAT  
Mace GTCTGCCAACCCAAGGAAGCTGTAGGGAGGACGCTGATGGTCTGGGTCGACTACGATGAT  
STANLEY GTCTGCCAACCCAAGGAAGCTGTAGGGAGGACGCTGATGGTCTGGGTCGACTACGATGAT

Drysdale -----  
RAC875 -----  
Norin61 GAATGGTGGACTAGTAGTATGCTTAGCAATAAGCTACGTAGTATTTTGTAAATGTGCAATC  
Jagger GAATGGTGGACTAGTAGTATGCTTAGCAATAAGCTACGTAGTATTTTGTAAATGTGCAATC  
Mattis GAATGGTGGACTAGTAGTATGCTTAGCAATAAGCTACGTAGTATTTTGTAAATGTGCAATC  
Julius GAATGGTGGACTAGTAGTATGCTTAGCAATAAGCTACGTAGTATTTTGTAAATGTGCAATC  
Arina GAATGGTGGACTAGTAGTATGCTTAGCAATAAGCTACGTAGTATTTTGTAAATGTGCAATC  
Spelta GAATGGTGGACTAGTAGTATGCTTAGCAATAAGCTACGTAGTATTTTGTAAATGTGCAATC  
Lancer GAACGGCCGACTAGTAGTATGCTTAGCAATAAGCTACGTAGTATTTTGTAAATGTGCAATC  
Gladius -----  
Kukri -----  
Landmark GAACGGCCGACTAGTAGTATGCTTAGCAATAAGCTACGTAGTATTTTGTAAATGTGCAATC  
Mace GAACGGCCGACTAGTAGTATGCTTAGCAATAAGCTACGTAGTATTTTGTAAATGTGCAATC  
STANLEY GAACGGCCGACTAGTAGTATGCTTAGCAATAAGCTACGTAGTATTTTGTAAATGTGCAATC

Drysdale -----  
RAC875 -----  
Norin61 AGTGTTCGTGTTTCTTTGTTAATCTGATGATGAAGTCCATGGTTTTTCAGTCTGAAATAACC  
Jagger AGTGTTCGTGTTTCTTTGTTAATCTGATGATGAAGTCCATGGTTTTTCAGTCTGAAATAACC  
Mattis AGTGTTCGTGTTTCTTTGTTAATCTGATGATGAAGTCCATGGTTTTTCAGTCTGAAATAACC  
Julius AGTGTTCGTGTTTCTTTGTTAATCTGATGATGAAGTCCATGGTTTTTCAGTCTGAAATAACC  
Arina AGTGTTCGTGTTTCTTTGTTAATCTGATGATGAAGTCCATGGTTTTTCAGTCTGAAATAACC  
Spelta AGTGTTCGTGTTTCTTTGTTAATCTGATGATGAAGTCCATGGTTTTTCAGTCTGAAATAACC  
Lancer AGCGTTCTGTTTCTTTGTTAATCTGATGATGAAGTCCATGGTTTTTCAGTCTGAAATAACC  
Gladius -----  
Kukri -----  
Landmark AGCGTTCTGTTTCTTTGTTAATCTGATGATGAAGTCCATGGTTTTTCAGTCTGAAATAACC  
Mace AGCGTTCTGTTTCTTTGTTAATCTGATGATGAAGTCCATGGTTTTTCAGTCTGAAATAACC  
STANLEY AGCGTTCTGTTTCTTTGTTAATCTGATGATGAAGTCCATGGTTTTTCAGTCTGAAATAACC

Drysdale -----  
RAC875 -----  
Norin61 AGACACCGTGCATTCCTTTTGTTC AAGCCTGCCTGCATATTTTGTGTAGTTACTGATGA  
Jagger AGACACCGTGCATTCCTTTTGTTC AAGCCTGCCTGCATATTTTGTGTAGTTACTGATGA  
Mattis AGACACCGTGCATTCCTTTTGTTC AAGCCTGCCTGCATATTTTGTGTAGTTACTGATGA  
Julius AGACACCGTGCATTCCTTTTGTTC AAGCCTGCCTGCATATTTTGTGTAGTTACTGATGA  
Arina AGACACCGTGCATTCCTTTTGTTC AAGCCTGCCTGCATATTTTGTGTAGTTACTGATGA  
Spelta AGACACCGTGCATTCCTTTTGTTC AAGCCTGCCTGCATATTTTGTGTAGTTACTGATGA  
Lancer AGACACCGTGCATTCC-----TTTTGTTGTAGTTAC---TGA  
Gladius -----  
Kukri -----  
Landmark AGACACCGTGCATTCC-----TTTTGTTGTAGTTAC---TGA  
Mace AGACACCGTGCATTCC-----TTTTGTTGTAGTTAC---TGA  
STANLEY AGACACCGTGCATTCC-----TTTTGTTGTAGTTAC---TGA
