# Supplementary material for: The wheat Seven in absentia gene is associated with increases in biomass and yield in hot climates
Source: PubMed Central journal article supplement (PMC8096608; doi:10.1093/jxb/erab044), 2021-02-05
Supplement: erab044_suppl_supplementary-figures-s1-s3_s6-s11_tables-s1-s4-s6.pdf [file erab044_suppl_supplementary-figures-s1-s3_s6-s11_tables-s1-s4-s6.pdf]

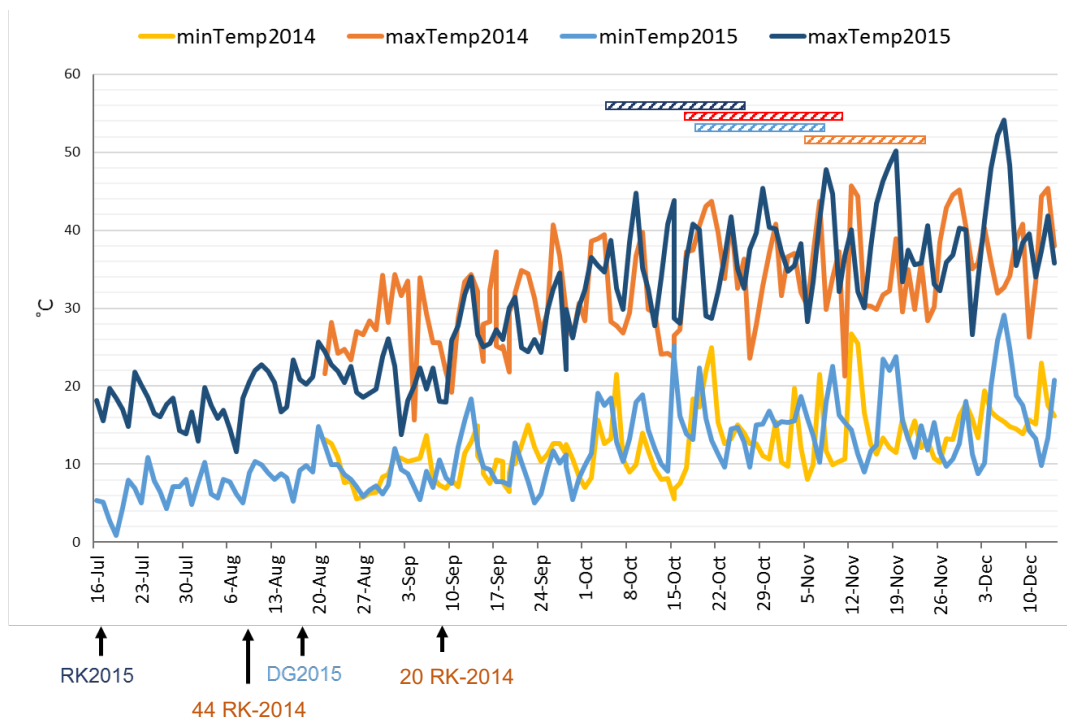

**Supplementary Fig. S1.** Air temperatures during 2014 and 2015 experiments using the RAC875 x Kukri and Drysdale x Gladius RILs in the deep soil platform in a polytunnel. Black arrows indicate the sowing date for each experiment and lines. In 2014, 44 RAC875 x Kukri RIL (RK) were planted in August and 20 RK in September. In 2015, 30 RK lines were planted in July and 20 Drysdale x Gladius RIL (DG) in August. Flowering periods have been highlighted for each experiment: red for Aug-2014; orange for Sept-2014; light blue for DG2015; dark blue for RK2015.

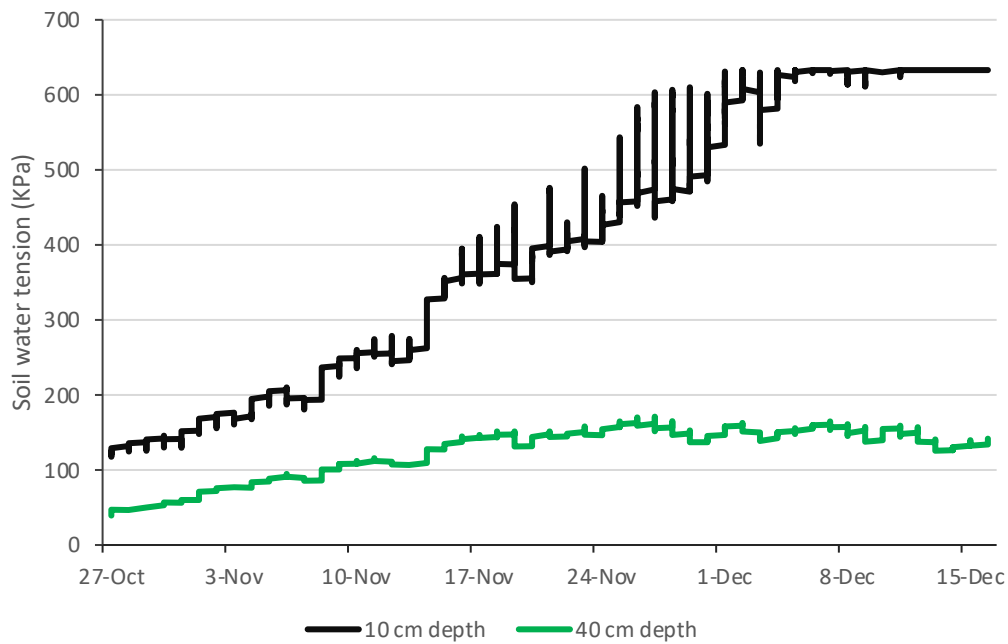

**Supplementary Fig. S2.** Average soil water tension during the grain-filling period when drought was imposed in the deep soil platform. RAC875 x Kukri RILs and parental lines were planted in August in three bins.

|        |        |        |        |        |
|--------|--------|--------|--------|--------|
| NIL 5A | NIL 2A | NIL 3B | NIL 3A | NIL 5B |
| NIL 1B | NIL 5B | NIL 5A | NIL 1A | NIL 4B |
| NIL 3B | NIL 2B | NIL 2A | Kukri  | NIL 4A |
| NIL 4A | NIL 3A | NIL 2B | NIL 4B | NIL 5A |
| RAC875 | NIL 1A | NIL 1B | NIL 4A | Kukri  |

**Supplementary Fig. S3.** Example of the randomized design developed for the deep-soil mimic wheelie bin experiments showing one of the bins in 2017 with parental lines RAC875 (allele A) and Kukri (allele B) and NIL containing either allele.

A

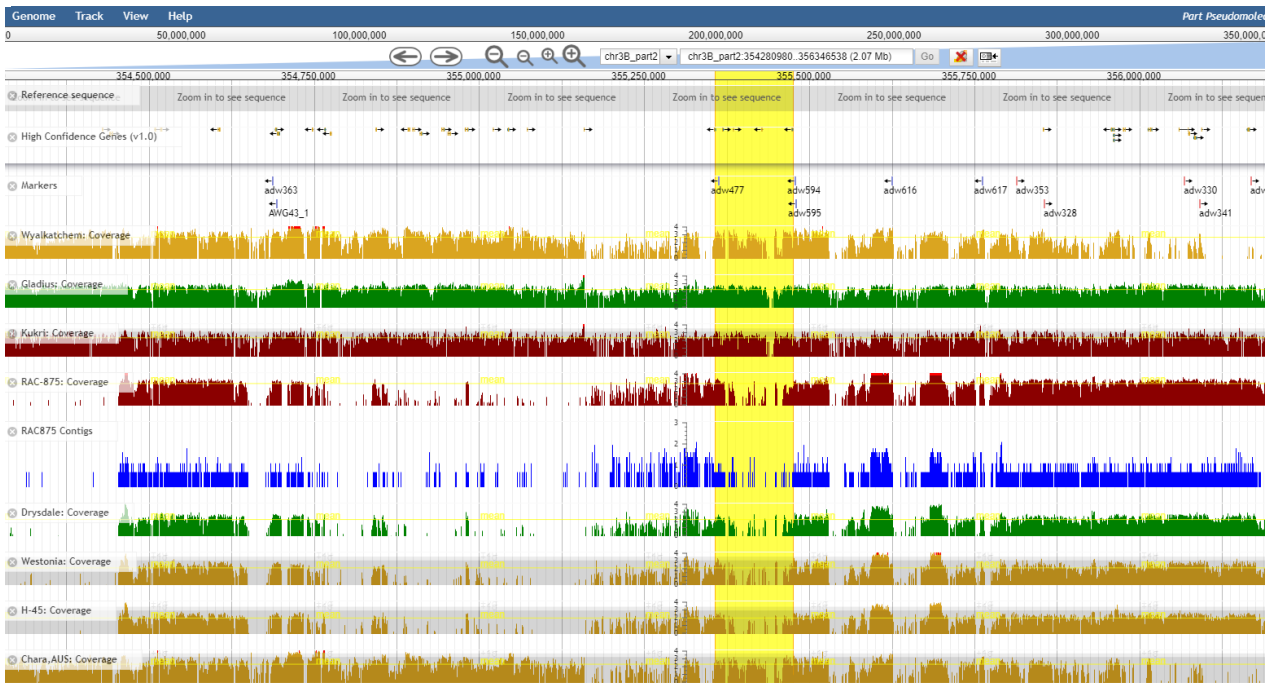

B

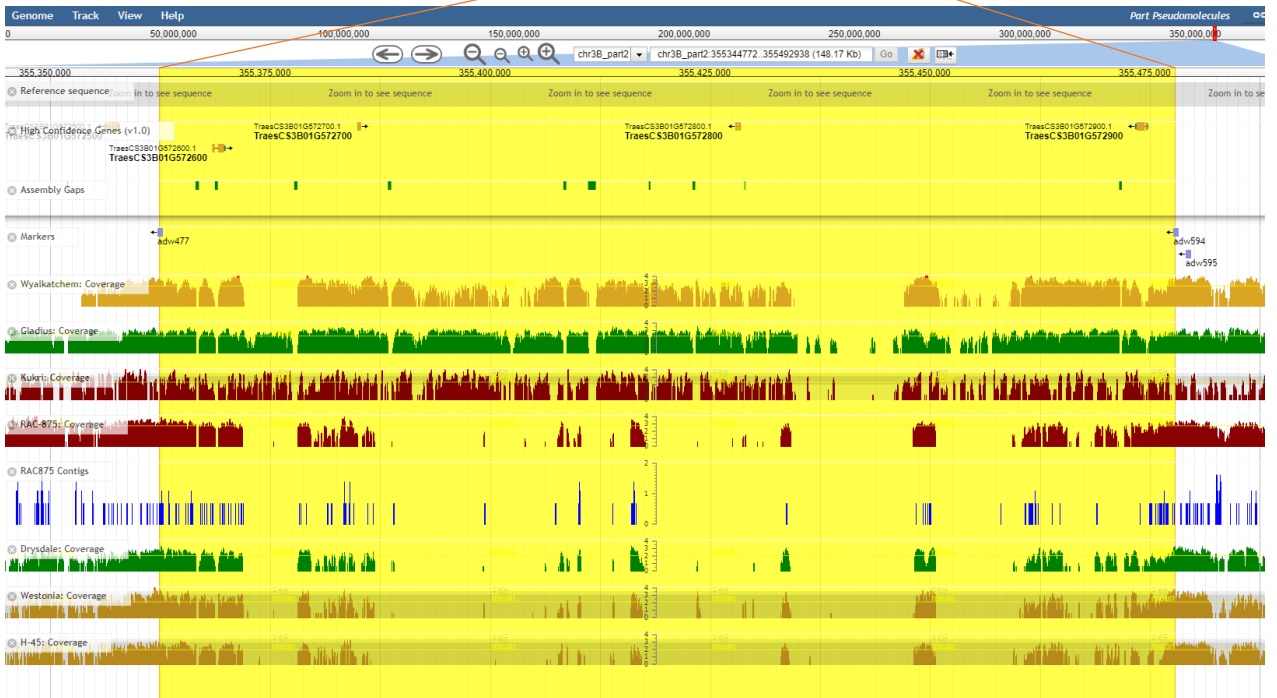

**Supplementary Fig. S6.** Genetic diversity around the *qYDH.3BL* QTL visualised in DAWN<sup>75</sup>. (A) The QTL is located between markers *adw477* and *adw594* and highlighted in yellow. Read coverage is displayed for eight wheat accessions with Kukri and RAC875 in dark red, Gladius and Drysdale in green. The track in blue represents the minimap2 alignment of assembled RAC875 contigs to the reference genome. (B) Close-up of the QTL showing the sparsity of reads from RAC875 and also RAC875 derived contigs. A track showing the location and relative size of assembly gaps has been added (3<sup>rd</sup> from top).

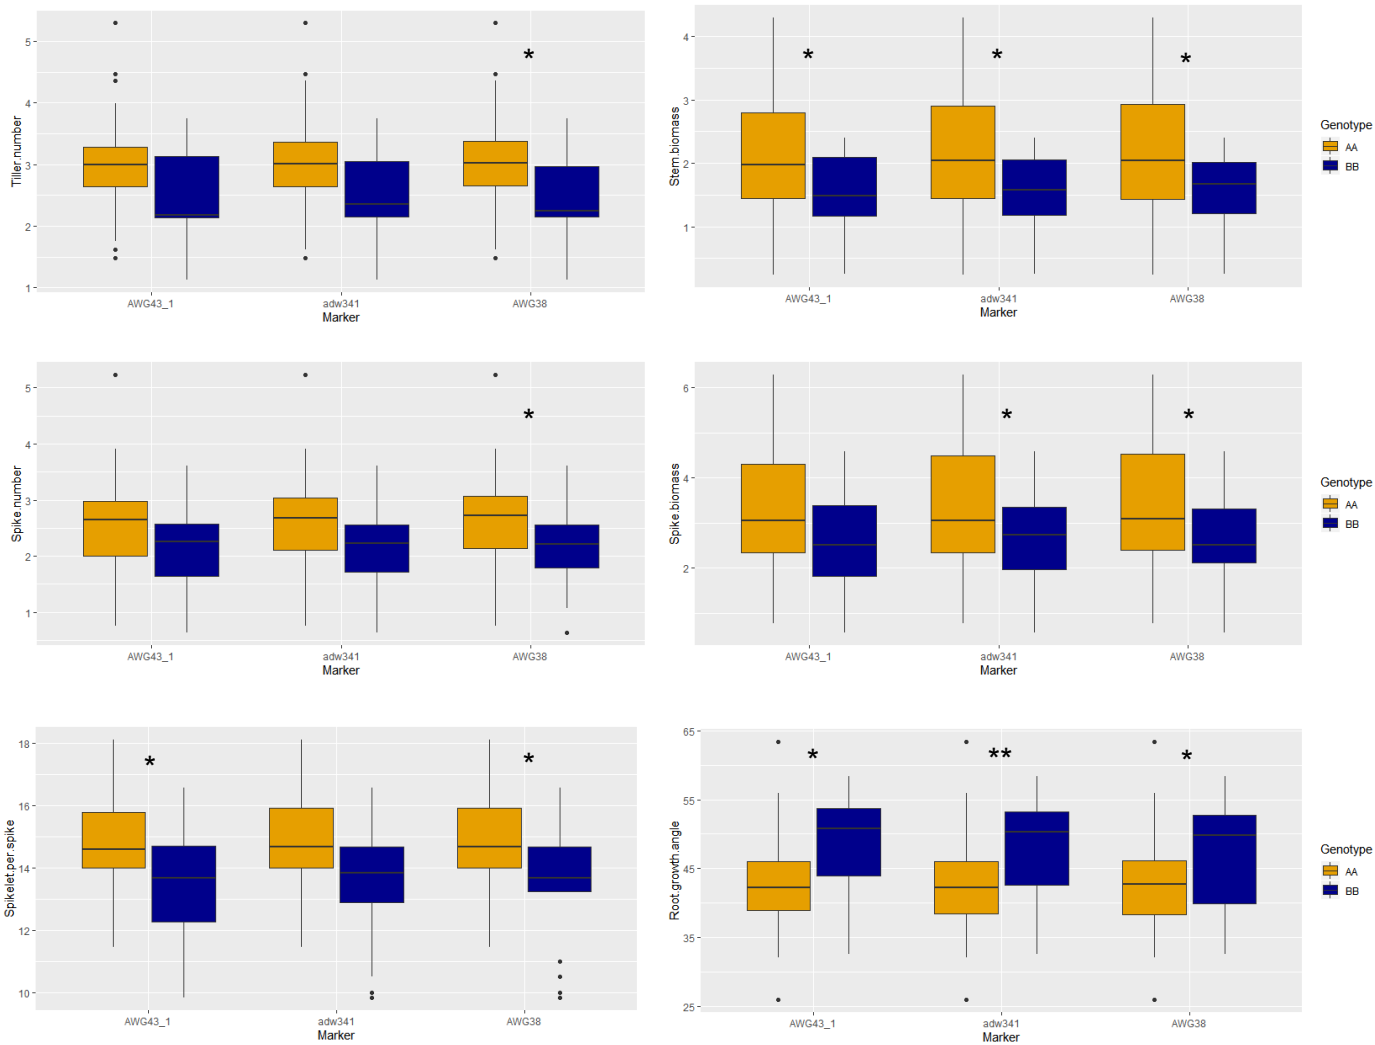

**Supplementary Fig. S7.** Single marker analysis of 44 RAC875 x Kukri RILs phenotyped in the deep soil platform sown in August 2014. AA: RAC875 allele; BB: Kukri allele. Anova of AA vs BB allelic effect with \* : p value < 0.05; \*\* : p value < 0.01.

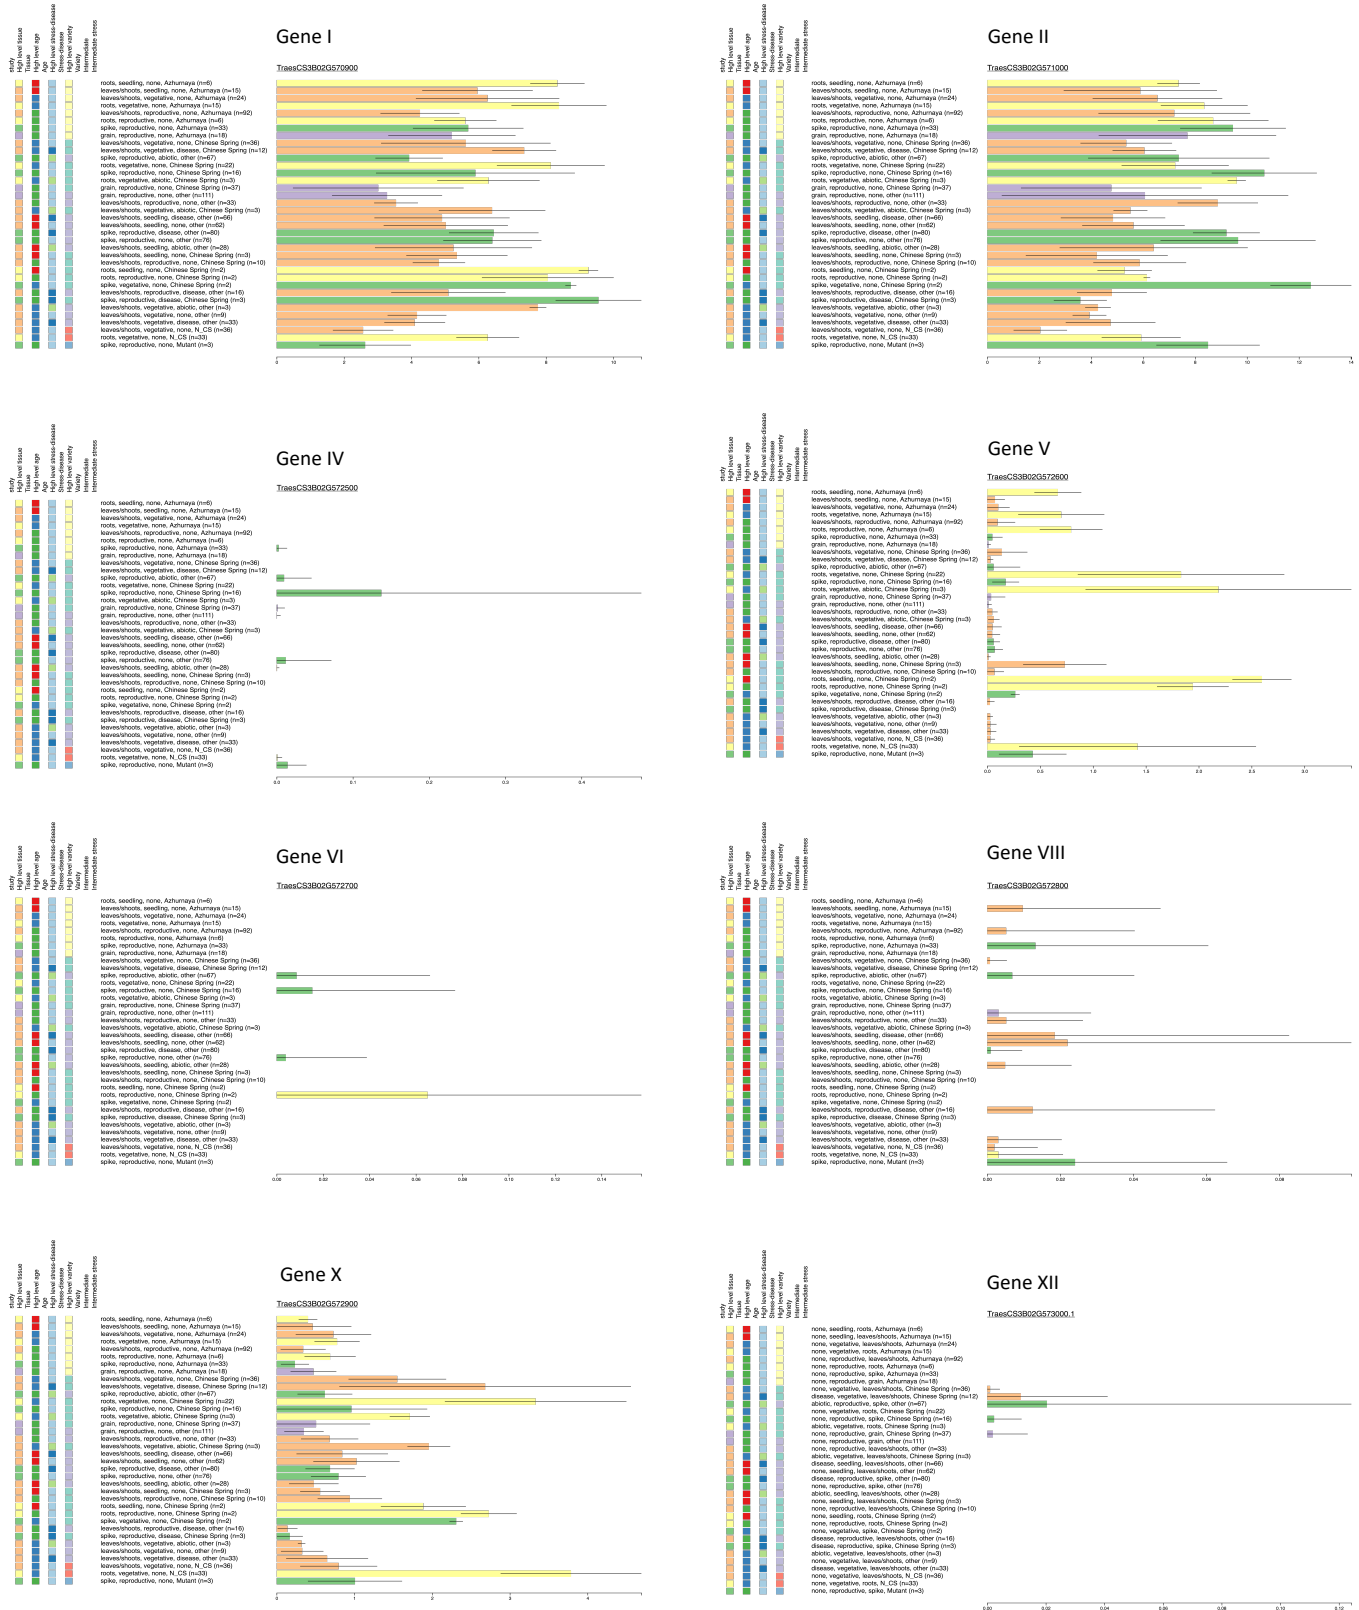

**Supplementary Fig. S8.** Expression profiles of High Confidence genes annotated in the interval delimited by ADW594 and ADW577 on chromosome 3B. Data were extracted from the wheat expVIP platform including 36 datasets (version Dec 2020).

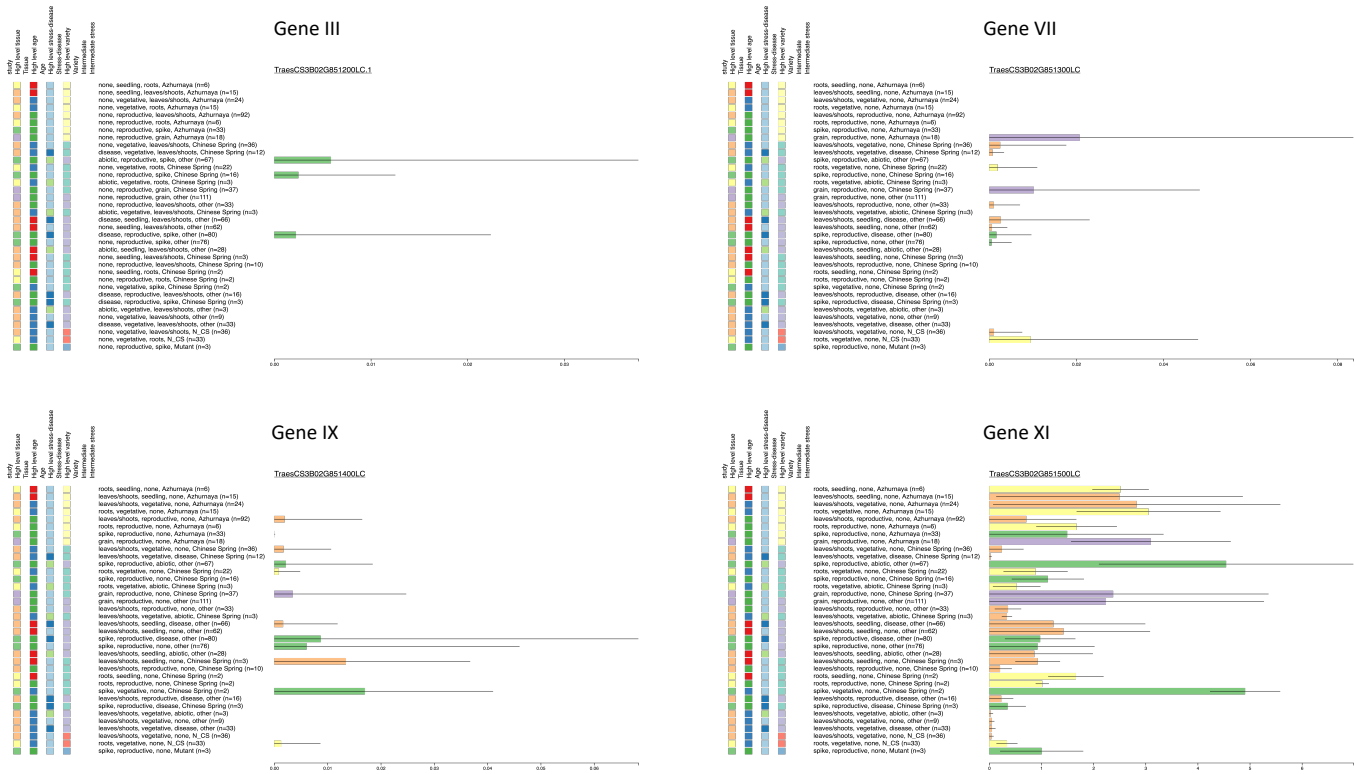

**Supplementary Fig. S9.** Expression profiles of Low Confidence genes annotated in the interval delimited by ADW594 and ADW577 on chromosome 3B. Data were extracted from the wheat expVIP platform including 36 datasets (version Dec 2020).

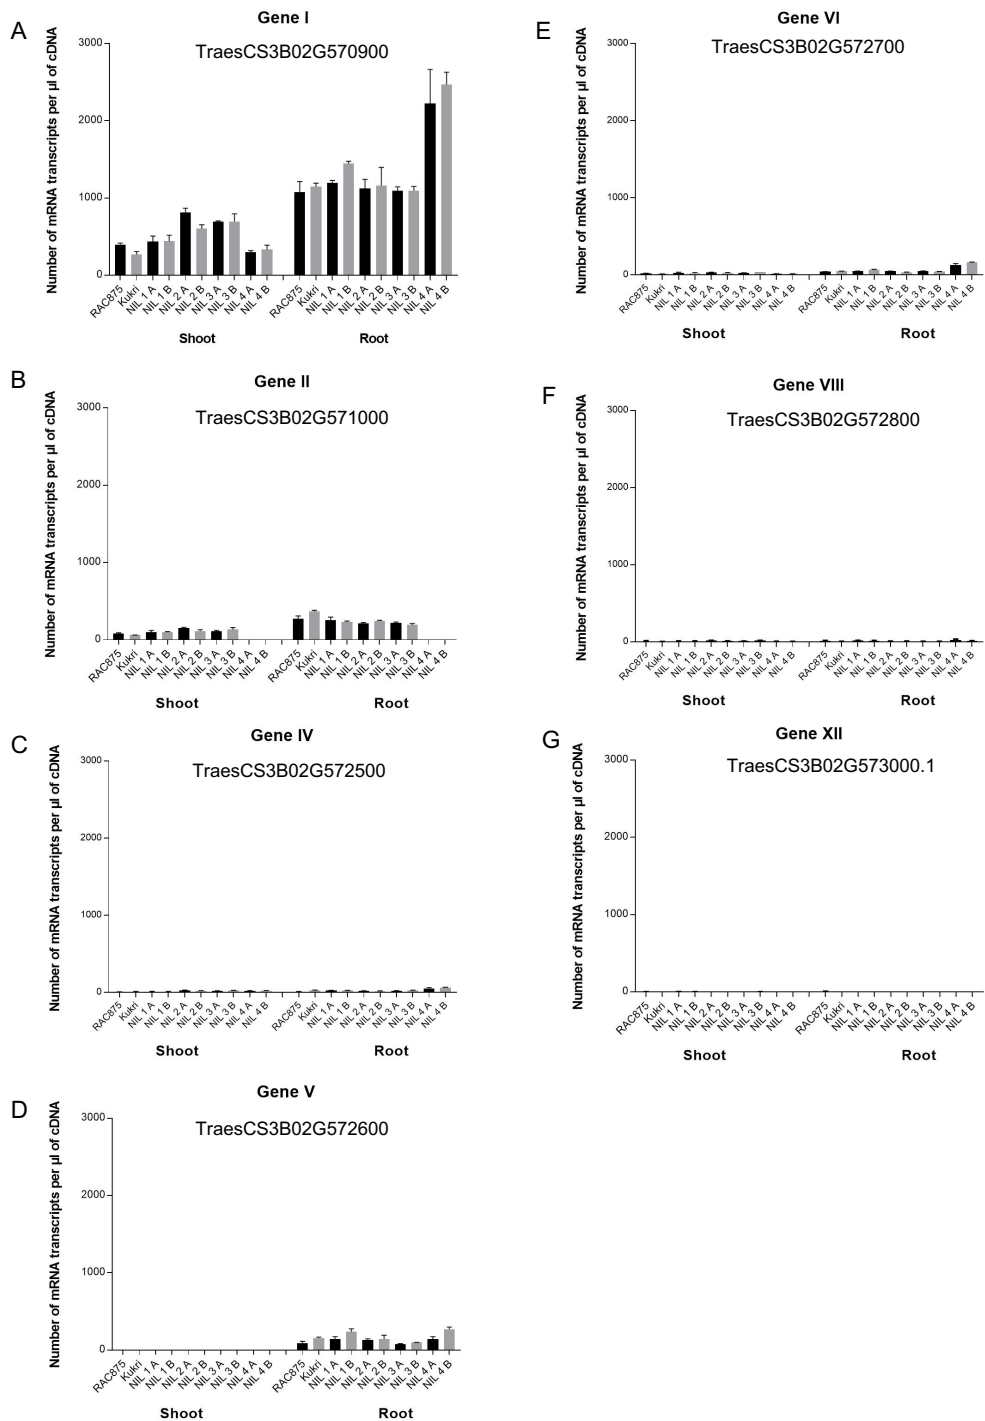

**Supplementary Fig. S10.** Expression of seven genes annotated in the interval delimited by ADW594 and ADW577. No significant differences in the expression profile of these genes could be found between parents and among the NILs. “A”: NIL contains the RAC875 allele; “B”: NIL contains the Kukri allele.



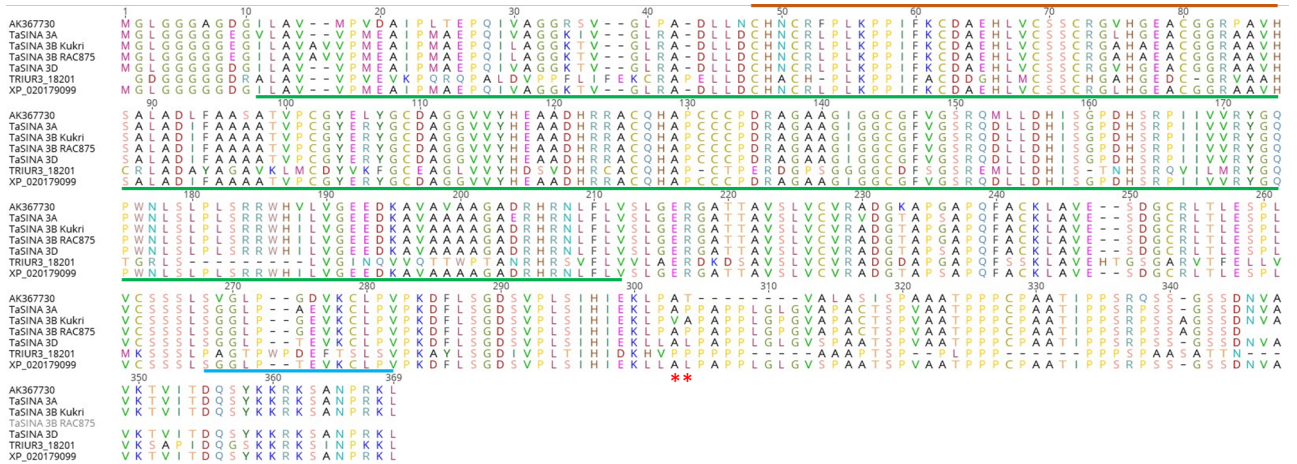

**Supplementary Fig. S11.** Amino acid alignment of *TaSINA* gene in RAC875 and Kukri and its homologues on chromosomes 3A and 3D with SINA genes from barley (*AK*), *Triticum urartu* (*TRIUR*) and *Aegilops tauschii* (*XP*). The conserved domains were identified and highlighted: the orange line indicates the position of the conserved amino acid in RING finger domain; the green line indicates the position of the TRAF-like domain of the Seven in absentia homolog family; the blue line indicates the position of a nuclear localization signal; the red star indicates the amino acid substitutions between *TaSINA* in Kukri and *TaSINA* in RAC875.

**Supplementary Table S1.** Descriptions of the environment in Ciudad de Obregon (Mexico) where the RAC875 x Kukri RILs field trials were conducted, showing water supply from rainfall and/or irrigation and RAC875 x Kukri DH and RIL (from Bonneau, 2012).

| Environ-<br>ment <sup>a</sup> | Latitude | Longitude | Altitude<br>(M) | Lines tested <sup>b</sup> | Sowing<br>density<br>seed m <sup>-2</sup> | Rainfall<br>and/or<br>irrigation<br>mm | Mean temperature<br>around flowering time <sup>c</sup> |      |
|-------------------------------|----------|-----------|-----------------|---------------------------|-------------------------------------------|----------------------------------------|--------------------------------------------------------|------|
|                               |          |           |                 |                           |                                           |                                        | Sept                                                   | Oct  |
| 11_DI_CS                      | 27°28' N | 109°56' W | 38              | 34 DH/77 RI               | 200                                       | 150                                    | 24.5                                                   | 29.3 |
| 12_DI_CS                      | 27°28' N | 109°56' W | 38              | 27 DH/ 40 RI              | 200                                       | 100                                    | 24.7                                                   | 26.6 |
|                               |          |           |                 |                           |                                           |                                        | April                                                  | May  |
| 11_FI_LS                      | 27°28' N | 109°56' W | 38              | 34 DH/ 109 RI             | 200                                       | 1050                                   | 30.7                                                   | 34.8 |
| 12_FI_LS                      | 27°28' N | 109°56' W | 38              | 27 DH/ 40 RI              | 200                                       | 900                                    | 30.5                                                   | 37.8 |

<sup>a</sup> Mex Mexico, DI drip irrigation, FI for flooding irrigation, LS for late sowing, CS for conventional sowing date.

<sup>b</sup> DH doubled haploid lines, RI recombinant inbred lines.

<sup>c</sup> The temperature data for Mexico were collected at [www.agroson.com.mx](http://www.agroson.com.mx)

**Supplementary Table S4.** ANOVA comparing agronomical and physiological traits between August and September 2014 experiments on RAC875/Kukri RIL and four parents (n = 48 lines for August and n = 24 lines for September).

| Phenotypic traits       | Mean Aug. | Mean Sept. | p value<br>$\alpha = 5\%$ |
|-------------------------|-----------|------------|---------------------------|
| Early vigour            | 0.65      | 0.58       | 0.04                      |
| Flag leaf length        | 15.15     | 11.14      | 5.25E-10                  |
| Flag leaf width         | 1.48      | 0.99       | 2.62E-12                  |
| Stomata density         | 23.52     | 24.37      | 0.21                      |
| Spike length            | 7.63      | 6.26       | 2.03E-05                  |
| Spikelet per spike      | 14.55     | 12         | 2.34E-05                  |
| Spike number            | 2.44      | 2.31       | 0.51                      |
| Spike biomass           | 3.13      | 2.04       | 0.0004                    |
| Stem biomass            | 1.96      | 0.97       | 7.25E-06                  |
| Tiller number           | 2.82      | 2.03       | 0.0002                    |
| Total grain             | 57.07     | 35.18      | 0.0003                    |
| One grain weight        | 36.62     | 32.28      | 0.003                     |
| Harvest index           | 0.29      | 0.28       | 0.3                       |
| Crown and brace roots   | 0.93      | 1.81       | 0.0002                    |
| Number of seminal roots | 4.22      | 4.35       | 0.67                      |
| Root growth angle       | 44.45     | 44.85      | 0.83                      |
| C amount                | 1252      | 1024       | 1.28E-08                  |
| N amount                | 102.19    | 78.38      | 1.46E-10                  |
| d13C                    | -23.15    | -23.95     | 2.01E-09                  |
| d15N                    | -3.097    | -2.806     | 0.17                      |
| d%13                    | 15.51     | 16.02      | 0.08                      |
| d%15                    | 3.11      | 2.82       | 0.16                      |
| %C                      | 42.45     | 43.58      | 0.13                      |
| %N                      | 3.48      | 3.31       | 0.03                      |
| [C]/[N]                 | 12.39     | 13.14      | 0.01                      |

**Supplementary Table S5.** Analysis of variance between sibling lines for root and shoot traits measured in RAC875/Kukri NIL (here called HIF from heterozygous inbred family) grown in pots in glasshouse in 2017. Traits were measured per plant at 21 and 42 DAS (n=6 plants per line). AA: RAC875 allele; BB: Kukri allele.

|         | 21 DAS       |                      |                       |                        |                                    |                                      |                     | 42 DAS           |                   |                        |                                    |                                      |                     |
|---------|--------------|----------------------|-----------------------|------------------------|------------------------------------|--------------------------------------|---------------------|------------------|-------------------|------------------------|------------------------------------|--------------------------------------|---------------------|
|         | Early Vigour | Dry root biomass (g) | Dry shoot biomass (g) | Total root length (cm) | Total root area (cm <sup>2</sup> ) | Total root volume (cm <sup>3</sup> ) | Number of root tips | Root biomass (g) | Shoot biomass (g) | Total root length (cm) | Total root area (cm <sup>2</sup> ) | Total root volume (cm <sup>3</sup> ) | Number of root tips |
| RAC875  | 25.31        | 0.06                 | 1.61                  | 1069.67                | 153.09                             | 2.58                                 | 804.83              | 0.66             | 2.87              | 2187.51                | 1293.27                            | 21.38                                | 7847.8              |
| Kukri   | 25.58        | 0.07                 | 1.88                  | 1024.61                | 149.63                             | 2.48                                 | 932.33              | 0.66             | 3.48              | 2237.9                 | 1314.73                            | 19.47                                | 8517.2              |
| T-test  | <b>0.9</b>   | <b>0.5</b>           | <b>0.31</b>           | <b>0.82</b>            | <b>0.89</b>                        | <b>0.85</b>                          | <b>0.41</b>         | <b>0.9</b>       | <b>0.27</b>       | <b>0.86</b>            | <b>0.9</b>                         | <b>0.51</b>                          | <b>0.56</b>         |
| HIF1-AA | 26.59        | 0.06                 | 1.87                  | 998.63                 | 142.05                             | 2.13                                 | 921.5               | 0.74             | 3.86              | 2501.01                | 1477.98                            | 24.19                                | 8938.2              |
| HIF1-BB | 28.44        | 0.05                 | 1.81                  | 1008.31                | 145.63                             | 2.22                                 | 831.67              | 0.62             | 3.38              | 2301.35                | 1351.45                            | 21.5                                 | 8210.5              |
| T-test  | <b>0.22</b>  | <b>0.52</b>          | <b>0.82</b>           | <b>0.93</b>            | <b>0.84</b>                        | <b>0.76</b>                          | <b>0.4</b>          | <b>0.3</b>       | <b>0.28</b>       | <b>0.58</b>            | <b>0.54</b>                        | <b>0.5</b>                           | <b>0.5</b>          |
| HIF2-AA | 19.17        | 0.05                 | 1.15                  | 851.68                 | 141.43                             | 2.33                                 | 582                 | 0.69             | 3.43              | 2074.47                | 1235.68                            | 18.66                                | 7561.7              |
| HIF2-BB | 22.36        | 0.06                 | 1.62                  | 832.61                 | 143.05                             | 2.42                                 | 625.17              | 0.61             | 3.71              | 2161.51                | 1274.81                            | 19.65                                | 7562.2              |
| T-test  | <b>0.57</b>  | <b>0.4</b>           | <b>0.26</b>           | <b>0.92</b>            | <b>0.96</b>                        | <b>0.8</b>                           | <b>0.79</b>         | <b>0.65</b>      | <b>0.68</b>       | <b>0.81</b>            | <b>0.85</b>                        | <b>0.75</b>                          | <b>0.99</b>         |
| HIF3-AA | 23.23        | 0.06                 | 1.91                  | 1122.94                | 174.6                              | 2.82                                 | 849.83              | 0.52             | 3.08              | 1916.83                | 1145.45                            | 16.48                                | 8427                |
| HIF3-BB | 20.05        | 0.05                 | 1.48                  | 982.58                 | 156.15                             | 2.45                                 | 706                 | 0.6              | 3.66              | 2262.58                | 1354.65                            | 20.82                                | 8024.8              |
| T-test  | <b>0.06</b>  | <b>0.25</b>          | <b>0.05</b>           | <b>0.34</b>            | <b>0.34</b>                        | <b>0.17</b>                          | <b>0.24</b>         | <b>0.56</b>      | <b>0.4</b>        | <b>0.46</b>            | <b>0.45</b>                        | <b>0.37</b>                          | <b>0.79</b>         |
| HIF4-AA | 24.09        | 0.06                 | 1.73                  | 1021.11                | 162.81                             | 2.65                                 | 771.17              | 0.4              | 2.97              | 1446.82                | 867.02                             | 12.8                                 | 6588.3              |
| HIF4-BB | 22.06        | 0.05                 | 1.83                  | 898.2                  | 143.41                             | 2.37                                 | 742                 | 0.57             | 3.03              | 1675.76                | 1002.51                            | 14.72                                | 7386.5              |
| T-test  | <b>0.31</b>  | <b>0.16</b>          | <b>0.62</b>           | <b>0.2</b>             | <b>0.16</b>                        | <b>0.24</b>                          | <b>0.73</b>         | <b>0.1</b>       | <b>0.9</b>        | <b>0.51</b>            | <b>0.5</b>                         | <b>0.58</b>                          | <b>0.57</b>         |

**Supplementary Table S6.** Analysis of root anatomy traits measured at 21 DAS in NIL (HIF) and parental lines, RAC875 and Kukri grown in pots in a glasshouse. Cross sections were done on six plants with three technical replicates per plant. Samples of seminal roots were collected at two positions: 5 cm away from the tip (TIP) and 2 cm away from the root-shoot junction (RSJ). AA: RAC875 allele; BB: Kukri allele; ns = non-significant; CMX = central metaxylem vessels.

|         | RSJ                |                     |                   |                          |                       |             |                   | TIP                |                     |                   |                          |                       |             |                   |
|---------|--------------------|---------------------|-------------------|--------------------------|-----------------------|-------------|-------------------|--------------------|---------------------|-------------------|--------------------------|-----------------------|-------------|-------------------|
|         | Root diameter (µm) | Stele diameter (µm) | CMX diameter (µm) | Protoxylem diameter (µm) | Thickness cortex (µm) | CMX number  | Protoxylem number | Root diameter (µm) | Stele diameter (µm) | CMX diameter (µm) | Protoxylem diameter (µm) | Thickness cortex (µm) | CMX number  | Protoxylem number |
| RAC875  | 519.22             | 221                 | 48.31             | 12.96                    | 298.22                | 1.69        | 9.25              | 480.75             | 193.06              | 56.68             | 12.63                    | 287.69                | 1.14        | 11.47             |
| Kukri   | 515.58             | 224.64              | 56.19             | 13.24                    | 290.94                | 1.14        | 13.17             | 427.14             | 177.89              | 55.90             | 13.81                    | 249.25                | 1.08        | 14.33             |
| T-test  | <b>0.87</b>        | <b>0.7</b>          | <b>0.03</b>       | <b>0.53</b>              | <b>0.75</b>           | <b>0.01</b> | <b>0.02</b>       | <b>0.22</b>        | <b>0.24</b>         | <b>0.89</b>       | <b>0.15</b>              | <b>0.25</b>           | <b>0.66</b> | <b>0.04</b>       |
| HIF1-AA | 517.06             | 243.14              | 50.88             | 15.46                    | 273.92                | 1.97        | 10.56             | 436.25             | 178.67              | 54.13             | 15.03                    | 257.58                | 1.08        | 10.50             |
| HIF1-BB | 517.67             | 221.22              | 53.11             | 15.26                    | 296.44                | 1.44        | 8.72              | 474.94             | 180.97              | 57.24             | 16.29                    | 293.97                | 1.17        | 11.11             |
| T-test  | <b>0.99</b>        | <b>0.14</b>         | <b>0.48</b>       | <b>0.83</b>              | <b>0.44</b>           | <b>0.25</b> | <b>0.17</b>       | <b>0.3</b>         | <b>0.81</b>         | <b>0.51</b>       | <b>0.02</b>              | <b>0.27</b>           | <b>0.67</b> | <b>0.57</b>       |
| HIF2-AA | 507.39             | 225.28              | 51.64             | 15.03                    | 282.11                | 1.56        | 10.89             | 511.36             | 180.02              | 56.96             | 13.78                    | 331.33                | 1.08        | 10.33             |
| HIF2-BB | 535.52             | 230.61              | 46.78             | 13.17                    | 304.92                | 2.00        | 10.14             | 518.83             | 191.81              | 55.69             | 12.22                    | 327.03                | 1.61        | 10.14             |
| T-test  | <b>0.33</b>        | <b>0.69</b>         | <b>0.4</b>        | <b>0.11</b>              | <b>0.36</b>           | <b>0.26</b> | <b>0.56</b>       | <b>0.85</b>        | <b>0.41</b>         | <b>0.81</b>       | <b>0.11</b>              | <b>0.91</b>           | <b>0.16</b> | <b>0.89</b>       |
| HIF3-AA | 506.4              | 219.7               | 49.25             | 15.71                    | 286.7                 | 1.63        | 7.53              | 447.83             | 180.25              | 66.25             | 15.78                    | 267.58                | 1.33        | 7.94              |
| HIF3-BB | 441.42             | 194.66              | 47.63             | 14.63                    | 246.75                | 1.42        | 10.00             | 413.86             | 179                 | 52.5              | 13.93                    | 234.86                | 1.22        | 10.86             |
| T-test  | <b>0.08</b>        | <b>0.16</b>         | <b>0.75</b>       | <b>0.31</b>              | <b>0.09</b>           | <b>0.44</b> | <b>0.04</b>       | <b>0.4</b>         | <b>0.91</b>         | <b>0.001</b>      | <b>0.07</b>              | <b>0.44</b>           | <b>0.59</b> | <b>0.03</b>       |
| HIF4-AA | 479.64             | 208.56              | 46.9              | 12.8                     | 271.1                 | 1.56        | 10.33             | 438.36             | 177.53              | 63.33             | 14.42                    | 260.83                | 1.06        | 10.31             |
| HIF4-BB | 519.36             | 223.64              | 47.64             | 14.14                    | 295.72                | 1.69        | 10.08             | 440.47             | 185.33              | 61.25             | 14.01                    | 255.14                | 1.25        | 10.08             |
| T-test  | <b>0.13</b>        | <b>0.25</b>         | <b>0.73</b>       | <b>0.2</b>               | <b>0.19</b>           | <b>0.54</b> | <b>0.84</b>       | <b>0.95</b>        | <b>0.41</b>         | <b>0.66</b>       | <b>0.63</b>              | <b>0.85</b>           | <b>0.09</b> | <b>0.88</b>       |
