# Supplementary material for: The wheat Seven in absentia gene is associated with increases in biomass and yield in hot climates
Source: PubMed Central journal article supplement (PMC8096608; doi:10.1093/jxb/erab044), 2021-02-05
Supplement: erab044_suppl_supplementary-figures-s4-s5.pdf [file erab044_suppl_supplementary-figures-s4-s5.pdf]

**Supplementary Fig. S4** Wheat *TaSINA* gene sequences from Kukri, RAC875, Drsydale and Gladius generated by Sanger sequencing using primers designed for TraesCS3B02G572900 of Chinese Spring RefSeq v2 and described in Supplementary Table 3. The fasta sequences include exons and introns.

>Kukri TaSINA (4,812-4,814..Start codon) (4,812-4,985..exon 1) (5,093-5,934...exon 2) (4,696-4,811..5' UTR)

```
ATAATGAGTTATCACTCCCTATTTGGGTGAATCACAAAAGTTTAAATTAAGAACAATCCATTCCATCAAACCTTGGAT
AATATTAGCTATTAATGTATAAAGATTAATACAATTATAGCTTTATTCGGCATGGATGCTATTCCATAGTACCATTAT
TCATAATATTATATTGAGTTAAACATACTGTAGATTATCCCAAATTGTAACAACCTTAAATAATAACTCCCTCCAT
TTTTATATAACAAGGCCACTATGGAATATACATTTTGCATATATATAAGGCCACCAACAGTAATCGAGGCAAATTTAA
TGATATTTTCTCGTACTAATAACCTGTTAATACTTGCATGCTTGCAATCATAATGACAGTCAGCTACTTCCTCCACT
CAGTTTTTTTGCATGCATGTGGAGTATTAATGATCCCAGTAAACAAGAAGAAAAGTTGACTTGTAAGCAGGCATT
AAATTTTACATTGGTACCTGTAATCCAAGTTTGTGGCCTTATATACAAAATGGAGGGAGTATAAAAATCTAGCAG
CGAAATGCGCGGATAACTGTGCTAACTACTCAATAAGAGGTTAAAAGAAGATTCACATGCACAACCTGTAGAAAA
CAAAGGCCACACAACCAGTATTTAAAAAATGTACATTAATTGGACTCCCTTATTCTACTTACCATGCACATATTT
TTTTCTAGTTTTTTCGTGATTATCTAGGGTATTATGGTTCACACACAGATGATTCTCTATCTTTCCAACCCTATTTTGG
GTAGTACTACCAATGCATATATTATCAATGTTCTCCATAAAAATGCTCCCGTGACATTAATACTATCCCACCATGCATG
GAGGAAATTAATGCATGCATATCATAACTATCTCAACGTCTAAACCGAAACAAGGCACCGCCAGATGCCGAGGG
CAAGCTCGTCCAACACTACACATCCAATTGTCAATCTCCACCACTCATTATATGCGGGCTTGAATAAAAAAATTAG
ATACTCCCTCCGTCTAGGTGTGTAAGTCATTTACGAAAACCAAATAATCCCAAATAATTAGGCGTGGTGCATTAA
CTTCTACCTCGTTTCTGTTTTTGGACATATCAACCAATAATAGATGAGGGTGTGCATGCTTTAATGACTTGAGACT
ATTAACACGACATGCAGTGGTTAGTTCATTGCATGCAATACTATTAATTAGCAAATAAACATTAATGTCTCTCATT
TTCCCTCCTCCTTGGTTCACGGTGCACAGCCTAAGATGACTTACTCACCTAGACGGAGGGAGTACTCACTTCAGAT
GGGAATACAAGTCGGGCACAGTTTCTAGGTCTTCAATTTGACAAGCGAATAATATGCCACAAAAAATGGTAAGA
AACCTCACCTGGCAAGGAATATACATTTTTTGTGGCATATAACATATATTTTGTCTGTCAATAGATAACCTAAAA
TCGGTGTCTGTGTATATTTCCACCCAAAGGGAGTAACAATTAGGAATTAAGAGAGCTTTTATTATGGTAGACCCTT
CTTTCATTAAGATGCCACGTCTAAGGACATCATCAATGTATCATTCTAAGTCGGTAATTAGCTGGGGCCACACTA
TGCTATAGCAAACCTCGAATTCCTCCTATGCTTAATCCAATATGGCTATGGACGTTAGGGTGAAGCCCACTGCCG
GTATTTTCTCTGTAGTTTTAACCCTCAAATCATGTGAGGGGAGAAAGAAATAGTTTTTGATTCTTGTGGCATGG
CCTTAGCACTATGACCGGTCTTAAAGATTTTTGTTGCTAGGACCCCTCCACAATGCTTGAGGATATGTCATTAGA
CCCATATTTTTGCAACAATGGAGACATAATATAAGATTTGATGATATATAGGTTATATTTTATTAGAGATGATCTCT
TAGGCCTGTCTCGATGGATATTATCATAAACTATTATCATTAAATGATGCTACTTTGCTTACTACATTTCCCATCATTT
CATAGCATCATAACATATATTTTACTGGGAATAAACTTATATTTTATAACTTAAAATTATTATCAAATGTGACAAAA
TACAAGAGGACTAGTGAATCAGGACGGAGGCGGTAGGAAAAGAGACAGTGTACGGTGGAGCATCGGGAGAGA
GAGTCCCAACAGTAAAAAGCCAACTCACTGAAAAGTAATGATTAATAAAGAAGATTCACATGCCCACTTGCAGTA
CTACCAAGCAAAAACACAAGGCCAATCGACCAGTAATGTATAATTAACAAACATTGTCACGGTCCCAGTTGAAAT
TTTTGGGTGATGGTGTCAACAGAGTATTTAATGTTCTACTAGAGGGCATTAAATGTGACATATCGTAGTTAATC
GCGGTGGCGTGGCAATGACATTGGCAAGCAAATAACTAGCTGAGTGTCTTGTCTCTCCACCACCACTAGTC
AAGCCTAATTAGCTAAGCTGCGTTGGAGAGGGCTAAAAGTGAGTCTCTCTGGACCTGGAATCCAAACATTCAAAA
ACGATTTGGTGAGAGCATCTCCAGTCGCATCCCAACACGGCCTTCCAGGCGATTTTTCTGTCGGGCGCCTAAAA
ATGGCCAGTCGCGTCCCAGGAGCCGTTTTTACCGGCTTGGGCCGAAATCAATACAGGCGGACCCAGGCCGA
ACCCGGCGCGCTGGGGGCGCCGGGGCGAGTGGTTTTGGCGGAAATAGCCCCGGGCCACCGAGTCTGCGAGAC
GGCCGTTCTGTCGCCCTCATCGCCTTGGTTCACGGAATCAATGCCAAGACTGCCACGATGCCGTCGCCGTTCA
GCCTTGCCATTGATAGCTCATCACGGGCGGCGCTCACGGGTGGCGGCGGACGCTCCCTCCCGCCACGCGTA
```

CACACGGGCGCGACTATATAAGCCGGTGGCCTCCCTCACCTTTGGCCACACCAGCCCTCGCCGTCCATCGACCGCC  
GTCGAGCTCTTCTCTCCCGTGCAGCCGCGACGTTCTTCCCTCCCTCTCCCTCACTCCCAAGCCCGGTGGCCGC  
GCGTTTCCCCGGCGACGGCCAACGGCTTCGGTACCCTCGCTTACGAGTGGAGGGTGGCTCCTGTTGAGGC  
GAACATCCCGGCCACCGGACATGCGCGCATGAACGATGGGGTGGAGACTCGGCAACGGGGGAGTGCCATT  
CCCCCGGTGCCCAGCTCGAGGCGTGCCCCGCTTCTTCGCCGCGAGGTGCACCGCTGCAAGCCTCCCTCACAG  
CGGAGCAACTCGCCCCACCAGTACGCCGTGAAAACCACGGCGGTGGGCGCGTACTTCCAGCACCGCCAGG  
AGCAAAGACTGGCGTCCACCAACGGGCGCCGATGGTGGGCAGCGTCAAGAACAGTGGGGGCCACCGCGTGTG  
GTGGGCGCCACCGAATATGCTCGACGGCGTGTGTCTACCTCGAGGGCGGTAACGAACCGTCGCTGGCATA  
GTCCCATGGCGGCCCGGGTCCACCGCCGGCAGCGGGGCAATGGATGCCAGGAGGTTCCGTTCCCTCCTCGA  
CTTCTCCTCGACTCCTCTCCCGTTCTTCTCCACTCCTCCGCTCGACGACTTGCTCGGCGTCAAGCCGAGC  
CCGAGCGGAGACGCTGCTCAGCCGGCAGTCTCGAGCGTGGCATCATATAAACGAGGGCGGCCGGCGCTCC  
TCCTCATCGGCTCCTCCGCGTTCGTCAAACCAAAGACGGAACCGAGGCTCGCGCCGTGAAAACGGAGCCGGG  
CTCCCCGCGTGAAGACAGACGCGGACGTGGAGCTCGATGAGGAGGCGACCCTAAAATGGGCGCGGCCGA  
CTGGCTCAAGATGGAGTGGGAGCGCCAGTGCGCCGCCCTGCAGCACTACGAACAGCGCCGCCAGGGCCGCGAC  
AAGGAGGCGTGTATCCTCAACGACAACGACGACGACGCGCCGCCACCGCCACCGGTTCCGCATGGCGAC  
GCCGGGCAAGGGTCCAGCGGGGGCGGCCGCTCAAGGAGGAGAAGACCGCCGCCGACGACGACGCGCCGCTCC  
ACCGGTCCGCCATGGCGACGCCGGGCAAGGGTCCAGCAGGGGCGGCCGCGTAAAGGAGGAGAAGGCCGCCGCC  
GACGACTACGCCGCTCAGCGACTTCTTCGCACCTTCTGTTAGTTTTGAGATAAATTTGCTATGTA  
AACTGTCTTTGTGTAATATATGTCAGTTTACCGAATTAAGCCAACTTTATTGAATGTTTTTTTTAATTTAGAC  
GGCGTGGGAACGGTCAATGGATCGCGACTGGGAATCCAGTTGCCTTAGGCGGCGATTTACGCGCCCCCTGG  
GGAACGGCTGGAGATGGTCTGAGTCTCCTGATGCCGAGCTCTCGGATGAATGGCAGATTTCTTTGAAATGTTG  
AGTTGGTGAATGCGTTAGGTTAGGTGGATGGTAAAAAGTAAAAACAATCTATTCCCAAAGTCTGAACCCGT  
CAAAATCTGGCTATGGGCACGGCCCCATCTCATCAGAGACCCCACCAGACCTCCTGTGACGGGGCTCGACCCGAT  
ACCATCTTGATCGGATCCATAACCCCTAACCCCTTGACCTACCTTCGCTACAAGCGCCAGTACACAGAGCAGAG  
AGCCGCCGCTGAGTGCTACCCGCCGCTGCTGGTGGCAACAGAGAGCCGCCGCCGCCGCCGCTGACTGA  
ATCTTGGTGGGGAGGAGAGAGAGGCTGGCCTCGGCGGGCGCGCGGAGAGGGGATCTGGCCGTGGCCGT  
GGTGGCCATGGAGGCCATCCCCATGGCGGAGCCGAGATCCTCGCCGGCGGAAGACCGTCGGCTGCGGGCGG  
ACCTGCTGACTGCCACAATGCCGCTCCCCCTCAAGCCCCCATATTCAAGGTGAGATCCGCGGCGGCCCCCT  
TCCCCAAGATTCATTTTCCGTTTTCTGAACTGACGCGCGTACCGAGCGTATCTGGTGTGCATGAATCTTGGC  
CGGCAGTGCGACGCCGAGCACCTGGTCTGCTCCTCGCGCGGCCCCACGCCAGGCCTGCGGCGGCCCGCGC  
GCCGTCCACTCCGCGCTCGCCGACATCTTCGCGGCCGCCGCCACCGTGCCTGCGGCTACGAGCGCTACGGTGC  
GACGCGGGCGGCGTGGTGTTACCACGAGGCGGCCGACCACCGGCGCGCGTGCCAGCACGCGCCCTGCTGCTGCC  
GGACCGCGCGGGCGCGGCCGGCATCGGGGCTGCGGCTTCTGCGGCTCCCGCCAGGACCTGCTCGACCACATCT  
CCGGGCCCCGACCTCGCGCCCCATCATCGTCTCGTACGGCCAGCCCTGGAACCTCAGCCTGCCGCTCTCGCG  
CCGCTGGCACATCCTCGTGGTGAGGAGGACAAGGCGGTGGCCGCCCGCGGGGCGCCGACCGGCACCGCAACC  
TCTTCTCGTCTCCCTCGCGGAGCGCGGCCACCACGGCCGTGTGCTGGTGTGCGTCCGGGCGGACGGCACGG  
CGCCGGGCGCGCCGAGTTCGCGTGAAAGCTCGCCGTGGAGAGCGACGGCTGCAGGCTGACCCTGGAGTCGCCG  
CTGGTGTGACGAGCTCCCTGTCCGCGGCGCTGCCGCGGAGGTCAGTGCCTGCCGTTGCCAAAGACTTTCTCT  
CCGGCGACAGTGTCCCTCAGCATCCACATCGAGAAGCTCCCGTTGCCCGCTCCTCTAGGACAGGAGT  
GGCGCCGGCCTGTACTCCCCGGTCCCGCCACGCTCTTCCCGCGGCCACCATCCCGCCTCCCGTCCGT  
CCTCCGCCGGCTCCTCCGACAA

>RAC875 TaSINA (4,816-4,818..Start codon) (4,816-4,989..exon 1) (5,097-5,936..exon 2) (4,700-4,815..5' UTR)

ATAATGAGTTATCACTCCCTATTCGGGTGAATCACAAAAGTTTAAATTAAGAACAATCCATTCCATCAAACCTTGAT  
AATATTAGCTATTAATGTATAAAGATTAATACAATTATAGCTTTATTCGGCATGGATGCTATTCATAGTACCATTAT  
TCATAATATTATATAGAGTTAAACATACTGTAGATTATCCCAAATTGTAACAACCTTTAATAATAATACTCCCTCCAT  
TTTTATATACAAGGCCACTATGGAATATACATTTTGCATATATATAAGGCCACCAACAGTAATCGAGGCAAATTA  
TGATATTTTCTCGTACTAACAACTGTTAATACTTGCATGCTTGCAATCATAATGACAGTCAGCTACTCCTCCACT  
CAGTTTTTTTTGCATGCATGTGGAGTATTAATGATCCCAGTAAACAAGAAGAAAAGTTGACTTGTAAGCAGGCAT  
TAAATTTTACATTGATACCTGTAATCCAAGTTTGTGGCCTTATATACAAAAATGGAGGGAGTATAAAAATCTAGCA  
GCGCAAATGCGCGGATACTGTGCTAACTACTCAATAAGAGGTTAAAAGAAGATTCACATGCACAACCTGTAGAAA  
ACAAAAGGCCACACAACCAGTATTTAAAAAATGTACATTAATTGGACTCCCTTCATTCCCTACTTACCATGCACATAT  
TTTTTCTAGTTTTTTCGTGATTATCTAGGGTATTATGGTTCCACACAGATGATTCTCTATCTTTCCAACCTTATTTT  
GGGTAGTACTACCAATGCATATATTATCAATGTTCTTTCCATAAAATGCTCCCGTGACATTAECTATCCCACCATGC  
ATGGAGGAAATTAATGCATGCATATCATTAACTATCTCAACGTCTAAACCGAAACAGGGCACCGCCAAATGCTGAG  
GGCAAGCTCGTCCAACACACATCCAATTGTCATGTCCACCACTCATTTATATGCGGGGCTTGAATAAAAAATTA  
GATACTCCCTCCGTCTAGGTGTGTAAGTCATCTTACGAAAACCAAATAATCCCAAATAAATTAGGCGTGGTGCATT  
AACTTCTACCTCATTCTTGTTTTTGACATATCAACCAATAATAGATGAGGGTGTGCATGCTTTAATGACTTGAGAC  
TATTAACACGACATGCAGTGGTTAGTTCATTGCATGCAATACTATTAATTAGCAAATAAACATTAATGTCTCTCAT  
TTCCCTCCTCCTTGGTCACGGTGACAGCCTAAGATGACTTACTCACGTAGACGGAGGGAGTACTCACTTCAGA  
TGGAATACAAGTCGGGCACATTTTCTAGGTCTTCAATTTGACAAGCGAATAATATGCCACAAAAAATGGTAAGA  
AACCTCACCTGGCAAGGAATATACATTTTTTGTGGCATATAACATATATTTTGTCTGTCAAATAGATATCCTAAAA  
TCGGTGTCTGTGTATATCCACCCAAAGGGAGTAACAATTAGGAATTAAGAGAGCTTTTATTATGGTAGACCCTT  
CTTTCATTAAGATACCCACGTCTAAGGACATCATCAATGTATCATTCTTAAGTCGGTAATTAGCTGGGGCCACACTA  
TGCTATAGCAAACCTCGAATTCCTCCTATGCTTAATCCAATATGGCTATGGACGTTAGGGTGAAGCCCACTTGCCG  
GTATTTTCTCTGTAGTTTTAACCCCTCAAATCATGTGAGGGGAGAAAGAAATAGTTTTTGATTCTTGTGGCATGG  
CCTTAGCACTATGACCGGTCTTAAAGATTTTTGTTGCTAGGACCCCTCCACAATGCTTGAGGATATGTCATTAGA  
CCCATATTTTTGCAACAATGGAGACATAATATAAGATTTGATGATATATAGTTATATTTTATTAGAGATGATCTCT  
TAGGCCTGTCTCGATGGATATTATCATAAACTATTATCATTAAATGATGCTACTTTGCTTACTACATTCCCATCATT  
CATAGCATCATAACATATATTTTACTGGGAATAAACTTATATTTTATAACTTAAAATTATTATCAAATGTGACAAAA  
TACAAGAGGACTAGTGAATCAGGACGGAGGCGGTAGGAAAAGAGACAGTGTACGGTGGAGCATCGGGAGAGA  
GAGTCCCAACAGTAAAAAGCCAACTACTGAAAAGTAGTGATTAAGAAGATTACATGCCCACTTGCAGTA  
CTACCAAGCAAAAACACAAGGCCAATCGACCAGTAATGTATAATTAAAAACATTGTCACGGTTCCCAAGTTGAAAT  
TTTTTGGTTCATGGTGTCAACAGAGTATTTAATGTTCTACTAGAGGGCATTAAATGTGACATATCGTAGTTAATC  
GCGGTGGCGTGGCAATGACATTGGCAAGCAAATAACTAGCTGAGTGTCTTGTCTCTCCACCCACCACTAGTC  
AAGCCTAATTAGCTAAGCTGCGTTGAAAGGGCTAAAAGTGAGTCTCTCTGGACCTGGAATCCAAACATTCAAAA  
ACGATTTTGGTGAGAGCATCTCCAGTCGCACCCTCAACACGGCCTTTCTGGCGATTTTTTCTGTGCCGCGCCTAAAA  
ATGGCCAGTCGCGTCCCAAGGAGCCCGTTTTTACCAGGCTTGGGCGCAAATCAGTACAGACGGACCCAGGCCGA  
ACCCGGCGCACTGGGGGCGCCGGGGCGAGTGGTTTTGGCGGAAATAGCCGCGGGCCACCGAGTCTGCGAGA  
CGGCCGCTTCGTGCGCCTCATCGCCTTGTTCCACGGGAATCAATGCCAAGACTGCCACGATGCCGCGCCGGTC  
AGCCTTGCCATTGATAGCTCATCACGGGCGGCGCTCACGGGTGGCGCGGGCAGCCTCCCTCCCGCCACGCGT  
ACACACGGGCGGACTATATAAGCCGGTGGCCTCCCTCACCTTTGGCCACACCAGCCCTCGCCGTCCATCGACCGC  
CGTCGAGCTTCTCTCTCCCGTGGCAGCCGCGACGCTCCTTCCCTCCCTCTCCCTCACTCCCAAGCCGGTGGCCG  
CGCGTTTTCCCGGCGACGGCCAACGGCTTCGGTCACCGCTCGCTTACGAGTGGGAGGCGTGGCTCCTGTTTCGAG  
GCGAACATCCCGGCGCCACCGGACATGCGCGCATGAACGATGGGGTGGAGACTCGGCAACGGGGGAGTGCCCA

TTCCCCGGTGCCCGACGTCGAGGCGTGCCCCGCTTCTTCGCCGCCGAGGTCGACCGCGTGCAAGCCTTCTCACA  
GCGGAGCAACTCGCCCCACCAGTACGCCGTGCGAAAACCACGCGGCGTGGGCGGCGTACTTCCAGCGCCGCCA  
GGAGCAAAGACTGGCGTCCACCAACGGGGCGCCGATGGTGGCAGCGTCAAGAATAGTGAGGGGCACCGCGTGT  
GGTGGGGCGCCCCGAATATGCTCGACGGCGTGTGTGTACCTCGAGGGCGGTAACGAACCGTGCCTGGCATA  
CCGTCCCATGGCGGCCGCCCGGTCCACCGCCGGCAGCCGGGCAATGGATGCCAGGAGGTTCCGGTTCCTCCTC  
GACTTCTCCTCGACTCCTCCTCCGTTCTTCTTCCACTCCTCCGGCTCGACGACGTTGCTCGGCGTCAAGGCCGA  
GCCCCGAGCGGAGACGCTGCTCGGCCGCGCACTCGCAGCGTCCGCATCATCATAAACGAGGGCGGCCGGCGCT  
CCTCCTCATCGGCTCCTCCGCGCTTCGTCAAACCAAAGACGGGAACCGAGGCTCGCGGCCGTGAAAACGGAGCCG  
GGGCTCCCCGCCGTGAAGACAGAGCACGGCGACGTGGAGCTCGATGAGGAGGGCACCCTAAAATGGGCGCGCA  
CCGACTGGCTCAAGATGGAGTGGGAGCGCCAGTGCGCCGCCCTGCAGCACTACGAACAGCGCCGCCAGGGCCGC  
GACGAAGGAGGCGTGTGTCTCAACGACAACGACGACGACGACGCGCCGCCACCGCCACCGGTCCGCCATGG  
CGACGCCGGCAAGGGTCCAGCAGGGGCGGCCGCTCAAGGAGGAGAAGACCGCCGCCGCCGACGACGCGCCG  
CCACCTCCACCGTCCGCCATGGCGACGCCGACAAGGGTCCAGCAGGGGGCGGCCGCTAAAGGAGGAGAAGG  
CCGCCGCCGACGACTACGCCGCTTCAGCGACTTCTTCGCACCTTCGTTGTAGTTTCGGCTTTTTTAGATAAATTTG  
CTATAAACTGTCTTCTTTGTGAATATATGTCCAGTTTACCGAATTTAGCCGAATTTATTGAATGTTTTTTTTAA  
TTTAGACGGCGTCTGGGAATGGTCATGGGATCGGCGACTGAGAATCCAGTTGCCCCAGGCGGCGATTTTACGCG  
CCCCTTGGGGAACGGCTGGAGATGCTCTGAGTCTCCTTGATGCCCGAGCTCTCGGATGAATGGCAGATTTCTTTG  
AATGTTGCAGTTGGGTGAATGCGGTTAGGTTAGGTGGATGGTAAAAAGTAAAAACAACCTTCTATTCCCAAAGTCT  
GAACCCGTCAAAATCTGGCTATGGGCACGGCCCCATCTCATCAGAGACCCCCACCAGACCTCCTGTGACGGGGCTC  
GCACCCGATACCATCTTGATCGGATCCATACCCCTTAACCCCTTGACCTCACCTTCGCTCACAAGCGCCAGTACAC  
AGAGCAGAGAGCCCGCCCTGAGTGCTACCCGCCGCTGCTGGTGCCAACAGACAGCCGCCCGCCCGCCCGCCG  
CCTGACTGAATCTTGGTGGGGGAGGAGAGAGATGGGCCTCGCCGGCGGCGGCGGAGAGGGGATCCTGGCC  
GTGGCCGTGGTGCCATGGAGGCCATCCCATGGCGGAGCCGAGATCCTCGCCGGCGGCAAGACCGTCCGGCT  
GCGGGCGGACCTGCTCGACTGCCACAACCTGCCGCTCCCCCTCAAGCCCCCATATTCAAGGTGAGATCCGCCGGC  
CGCCCTCTTCTCAAGATTCATTTTTCCGTTTTCTGAATCTGGCACGGCGTGACCGAGCGTATCTGGTGTGCATG  
AATCTTGGCCGGCAGTGCAGCGCCGAGCACCTGGTCTGCTCCTCCTGCCGCGGCGCCACGCCGAGGCCTGCGGC  
GGCCGCGCCCGTCCACTCCGCGCTCGCCGACATCTTCGCGGCCGCCACCCTGCCCTGCGGCTACGAGCGC  
TACGGCTGCGACGCCGGCGGCGTGGTGTACCACGAGGCCGCCACCACCGCGCGCGTGCAGCACGCGCCCTG  
CTGCTGCCCGACCGCGCGGGCGCGGCCGGCATCGGGGGCTGCGGCTTCGTCGGCTCCCGCCAGGACCTGCTCG  
ACCACATCTCCGGCCCCGACCACTCGCGCCCCATCATCGTGTCCGCTACGGCCAGCCGTGGAACCTCAGCCTGCC  
GCTCTCGCGCCGCTGGCACATCCTCGTCCGCGAGGAGACAAGGCGGTGGCCGCCGCCGCGGGCGCCGACCGGC  
ACCGCAACCTCTTCTCGTCTCCCTCGGCGAGCGCGGCCACCACGGCCGTGTGCTGGTGTGCGTCCGGGCGG  
ACGGCACGGCGCCGGGCGCGCCGAGTTCGCGTGAAGCTCGCCGTGGAGAGCGACGGCTGCAGGCTGACCCTG  
GAGTCGCTCTGGTGTGCAGCAGCTCCCTGTCCGGCGGCTGCCGGGCGAGGTCAAGTGCCTGCCGGTGCCTAAA  
GACTTCTGTCCGGCGACAGTGTGCCCTCAGCATCCACATCGAGAAGCTCCCGGCTCCCCAGCTCCTCCTAG  
GACCAGGAGTGGCGCCGGCCTGTACTTCCCCGTCGCCGCCACCCCTCCTCCTGCCCGGCCACCATCCCGCC  
TTCTCGTCCGTCTCCGCCGGCTCCTCCGAC

>Drysdale TaSINA (4,814-4,816..Start codon) (4,814-4,987..exon 1) (5,095-5,935..exon 2) (4,698-4,813..5'  
UTR)

ATAATGAGTTATCACTCCCTATTCGGGTGAATCACAAAAGTTTAAATTAAGAACAATCCATTCCATCAAACCTTGGAT  
AATATTAGCTATTAATGTATAAAGATTAATACAATTATAGCTTTATTCGGCATGGATGCTATTCCATAGTACCATTAT  
TCATAATATTATAGAGTTAAACATACTGTAGATTATCCCAAATTGTAAACAACCTTAAATAATAACTCCCTCCAT

TTTTATATAACAAGGCCACTATGGAATATACATTTTGCATATATATAAGGCCACCAACAGTAATCGAGGCAAATTA  
TGATATTTTCTCGTACTAACACCTGTTAATACTTGCATGCTTGCAATCATAATGACAGTCAGCTACTTCCTCCACT  
CAGTTTTTTTTGCATGCATGTGGAGTATTAATGATCCCAGTAAACAAGAAGAAAAGTTGACTTGTAAGCAGGCAT  
TAAATTTTACATTGATACCTGTAATCCAAGTTTGTGGCCTTATATACAAAAATGGAGGGAGTATAAAAATCTAGCA  
GCGCAAATGCGCGGATAACTGTGCTAACTACTCAATAAGAGGTTAAAAGAAGATTCACATGCACAACCTGTAGAAA  
ACAAAAGGCCACACAACCAGTATTTAAAAAATGTACATTAATTGGACTCCCTTCATTCTACTTACCATGCACATAT  
TTTTTCTAGTTTTTCTGATTATCTAGGGTATTATGGTTCCACACAGATGATTCTCTATCTTTCCAACCCTTATTTT  
GGGTAGTACTACCAATGCATATATTATCAATGTTCTTTCCATAAAATGCTCCCGTGACATTA ACTATCCCACCATGC  
ATGGGAGGAATTAATGCATGCATATCATTAACTATCTCAACGTCTAAACCGAAACAGGCACCGCCAGATGCTGAG  
GGCAAGCTCGTCCAACACTACACATCCAATTGTCAATGTCCACCACTCATTTATATGCGGGCTTGAACATAAAAAATTAG  
ATACTCCCTCCGTCTAGGTGTGTAAGTCATCTTACGAAAACCAAATAATCCCAAAAATAATTAGGCGTGGTGCATTAA  
CTTCTACCTCATTTCTTGTTTTTGACATATCAACCAATAATAGATGAGGGTGTGCATGCTTTAATGACTTGAGACTA  
TTAAACACGACATGCAGTGGTTAGTTCATTGCATGCAACTACTATTAATTAGCAAATAAACATTAATGTCTCTCATTTT  
CCCCTCCTCCTGGTACGGTGCACAGCCTAAGATGACTTACTCACGTAGACGGAGGGAGTACTCACTTCAGATGG  
GAATACAAGTCGGGCACATTTTCTAGGTCTTCAATTTGACAAGCGAATAATATGCCACAAAAAATGGTAAGAAAC  
CTCACCTGGCAAGGAATATACATTTTTTGTGGCATATAACATATATTTTGCTTGTCAAATAGATATCTAAAAATCG  
GTGTCTGTGTATATTTCCACCCAAAGGGAGTAACAATTAGGAATTAAGAGAGCTTTTATTATGGTAGACCCCTTCTTT  
CATTAAAGATACCCACGTCTAAGGACATCATCAATGTATCATTCTTAAAGTCGGTAATTAGCTGGGGCCACACTATGCT  
ATAGCAAACCTCGAATTCCTCCTATGCTTAATCCAATATGGCTATGGACGTTAGGGTGAAGCCCACTTGCCGGTATT  
TTCTCTGTAGTTTTAACCCCTCAAATCATGTGAGGGGAGAAAGAAATAGTTTTTGATTCTTGTGGCATGGCCTTA  
GCACTATGACCGGTCTTAAAGATTTTTGTTGCTAGGACCCCTTCCACAATGCTTGAGGATATGTCATTAGACCCAT  
ATTTTTGCAACAATGGAGACATAATATAAGATTTGATGATATATAGGTTATATTTTATTAGAGATGATCTCTTAGGC  
CTGTCTCGATGGATATTATCATAAACTATTATCATTAAATGATGCTACTTTGCTTACTACATTTCCCATCATTTTCATAGC  
ATCATAACATATATTTTACTGGGAATAAACTTATATTTTATAACTTAAAATTATTATCAAATGTGACAAAATACAAG  
AGGACTAGTGAATCAGGACGGAGGCGGTAGGAAAAGAGACAGTGTACGGTGGAGCATCGGGAGAGAGAGTCC  
CAACAGTAAAAAGCCAACTCACTGAAAAGTAGTGATTAAGAAGATTACATGCCCACTTGCACTACTACCAA  
GCAAAAACACAAGGCCAATCGACCAGTAATGTATAATTA AAAACATTGTACGGTTCCCAAGTTGAAATTTTTTGG  
GTCATGGTGTCAACAGAGTTATTTAATGTTTCTACTAGAGGGCATTAAATGTGACATATCGTAGTTTAAATCGCGGTG  
GCGTGGCAATGACATTGGCAAGCAAATAACTAGCTGAGTGTCTTGTCTCTCCACCCACCACTAGTCAAGCCT  
AATTAGCTAAGCTGCGTTGGAAAGGGCTAAAAGTGAGTCTCTCTGGACCTGGAATCCAACATTCAAAAACGATTT  
GGTGAGAGCATCTCCAGTCGCACCCTCAACACGGCCTTTCTGGCGATTTTTCTGTGCCGGCGCCTAAAATGGCCC  
AGTCGCGTCCCAGGAGCCCGTTTTTACC GGCTTGGGCCGAAATCAGTACAGACGGACCCAGGCCGAACCCGGC  
GCACTGGGGGGCGCCGGGGCGAGTGGTTTTGGCGCGAAATAGCCGCGGGCCACCGAGTCTGCGAGACGGCCGC  
TTCGTGCCCTCATCGCTTGGTTCCACGGGAATCAATGCCAAGACTGCCACGATGCCGCCGCCGGTACGCCTTG  
CCATTGATAGCTCATCACGGGCGGCGGTACGGGTGGCGCGGACGCTCCCTCCCGCCACGCGTACACACG  
GGCGGACTATATAAGCCGGTGGCTCCCTCACCTTTGGCCACACCAGCCCTCGCCGTCCATCGACCGCCGTCGAG  
CTCTTCTCTCCCGTGCAGCCGCGACGCTCCTTCCCTCCCTCTCCCTCACTCCCAAGCCCGGTGGCCGCGCGTTT  
CCCGGCGACGGCCAACGGCTTCGGTCAACGCTCGCTTACAGAGTGGGAGGCGTGGCTCCTGTTTCGAGGCGAACAT  
CCCGGCGCACCGGACATGCGCGCATGAACGATGGGGTGGAGACTCGGCAACGGGGGAGTGCCATTCCCCGG  
TGCCCGACGTCGAGGCGTGCCCCGCTTCTTCGCCGCGAGGTCGACCGCGTGCAAGCCTTCTCACAGCGGAGCA  
ACTCGCCCCCACCAGTACGCCGTCGAAAACCACGCGGCGTGGGCGGCGTACTTCCAGCGCCGCCAGGAGCAAAG  
ACTGGCGTCCACCAACGGGGCGCCGATGGTGGGACGCGTCAAGAATAGTGAGGGGCACCGCGTGTGGTGGGGC  
GCCCCGAATATGCTCGACGGCGTGTGTCTGACCTCGAGGGCGGTAACGAACCGTCTGCTGGCATAACCGTCCCAT  
GGCGGCCGCCCGGTCCACCGCCGCGACGCCGGCAATGGATGCCAGGAGGTTCCGGTCTCTCTCGACTTCTCT

CTCGCACTCCTCCTCCCGTTCTTCTCCCACTCCTCCGGCTCGACGACGTTGCTCGGCGTCAAGGCCGAGCCCGCAG  
CGGAGACGCTGCTCGGCCGGCGCACTCGCAGCGTCGGCATCATCATAAACGAGGGCGGCCGGCGCTCCTCCTCAT  
CGGCTCCTCCGCGCTTCGTCAAACCAAAGACGGGAACCGAGGCTCGCGGCCGTGAAAACGGAGCCGGGGCTCCC  
CGCCGTGAAGACAGAGCACGGCGACGTGGAGCTCGATGAGGAGGCGACCCCTAAAATGGGCGCGCACCGACTGG  
CTCAAGATGGAGTGGGAGCGCCAGTGCGCCGCCCTGCAGCACTACGAACAGCGCCGCCAGGGCCGCGACGAAGG  
AGGCGTCGTCGTCTCAACGACAACGACGACGACGACGCGCCGCCACCGCCACCGGTCCGCCATGGCGACGCCG  
GGCAAGGGTCCAGCAGGGGCGGCCGCGTCAAGGAGGAGAAGACCGCCGCCGCCGACGACGCGCCGCCACCTCC  
ACCGGTCCGCCATGGCGACGCCGACAAGGGTCCAGCAGGGGCGGCCGCGTAAAGGAGGAGAAGGCCGCCGCC  
GACGACTACGCCGCGTTCAGCGACTTCTTCGCACCTTCGTTGTAGTTTTCGGCTTTTTTAGATAAATTTGCTATATAA  
CTGTCTTCTTTGTGTAATATATGTCCAGTTTACCGAATTTAGCCGAATTTATTGAATGTTTTTTTTAATTTAGACGG  
CGTCTGGGAATGGTCATGGGATCGGCGACTGAGAATCCAGTTGCCCCAGGCGGGGATTTCGCTCCCTTGGG  
GAACGGCTGGAGATGCTCTGAGTCTCCTTGATGCCGAGCTCTCGGATGAATGGCAGATTTCTTTGAATGTGCA  
GTTGGGTGAATGCGGTTAGGTTAGGTGGATGGTAAAAAGTAAAAACAATTTCTATCCCAAAGTCTGAACCCGTC  
AAAATCTGGCTATGGGCACGGCCCATCTCATCAGAGACCCACCAGACGTCCTGTGACGGGGCTCGCACCCGAT  
ACCATTTTGTATCGGATCCATACCCCTTAACCCCTTGACCTCACCTTCGCTACAAGCGCCAGTACACAGAGCAGAG  
AGCCGCCCGCTGAGTGCTACCCGCCGCTGCTGGTGCCAACAGACAGCCGCCCGCCGCCCGCCGCTGACTGA  
ATCTTGGTGGGGGAGGAGAGAGATGGGCCTCGCGGGCGGCGGCGGAGAGGGGATCCTGGCCGTGGCCGT  
GGTGCCCATGGAGGCCATCCCATGGCGGAGCCGCAGATCCTCGCCGGCGCAAGACCGTCCGCCCTGCGGGCGG  
ACCTGCTCGACTGCCACAACCTGCCCCTCCCCCTCAAGCCCCCATATTCAAGGTGAGATCCGCCGGCCGCCCTCT  
TCTCCAAGATTCATTTTCCGTTTTCTGAATCTGGCACGGCGTGACCGAGCGTATCTGGTGTGCATGAATCTTGGC  
CGGCAGTGCGACGCCGAGCACCTGGTCTGCTCCTGCGCGGCCACGCCGAGGCTGCGGGCGGCCGCGCC  
GCCGTCCACTCCGCGCTCGCCGACATCTTCGCGGCCGCCACCCTGCCCTGCGGCTACGAGCGCTACGGCTGC  
GACGCCGGCGGCGTGGTGTACCACGAGGCCGCCGACCACCGGCGCGCGTGCCAGCACGCGCCCTGCTGCTGCC  
GGACCGCGCGGGCGCGGCCGCGCATCGGGGGCTGCGGCTTCGTCGGCTCCCGCCAGGACCTGCTCGACCACATCT  
CCGGCCCCGACCACTCGCGCCCCATCATCGTCCGCTACGGCCAGCCGTGGAACCTCAGCCTGCCGCTCTCGCG  
CCGCTGGCACATCCTCGTCCGCGAGGAGGACAAGGCGGTGGCCGCCGCCGCGGGCGCCGACCGGCACCGCAACC  
TCTTCTCGTCTCCCTCGGCGAGCGCGGCCACCACGGCCGTGTCGCTGGTGTGCGTCCGGGCGGACGGCACGG  
CGCCGGGCGCGCCGAGTTCGCGTGCAAGCTCGCCGTGGAGAGCGACGGCTGCAGGCTGACCCTGGAGTCGCCCT  
CTGGTGTGCAGCAGCTCCCTGTCCGCGGCCCTGCCGGCGAGGTCAAGTGCCTGCCGGTGCCAAAGACTTCTG  
TCCGCGACAGTGTGCCCTCAGCATCCACATCGAGAAGCTCCCGGCTCCCCAGCTCCTCCTTAGGACCAGGAG  
TGCGCCCGGCGCTGACTTCCCCGTCGCCGCCACCCCTCCTCCCTGCCCGGCCACCATCCCGCCTTCTCGTCCG  
TCCTCCGCCGGCTCCTCCGACA

>Gladius TaSINA (4,809-4,811..Start codon) (4,809-4,982..exon 1) (5,090-5,920..exon 2) (4,693-4,808..5'  
UTR)

ATAATGAGTTATCACTCCCTATTTGGGTGAATCACAAAAGTTTAAATTAAGAACAATCCATTCCATCAAACCTTGGAT  
AATATTAGCTATTAATGTATAAAGATTAATACAATTATAGCTTTATTCGGCATGGATGCTATTCCATAGTACCATTAT  
TCATAATATTATATTGAGTTAAACATACTGTAGATTATCCCAAATTGTAACAACCTTAAATAATAACTCCCTCCAT  
TTTTATATAAAGGCCACTATGGAATATACATTTTGCATATATATAAGGCCACCAACAGTAATCGAGGCAAATTTAA  
TGATATTTTCTCGTACTAATAACCTGTTAATACTTGCATGCTTGCAATCATAATGACAGTCAGCTACTTCCCTCCACT  
CAGTTTTTTTGCATGCATGTGGAGTATTAATGATCCCAGTAAACAAGAAGAAAAGTTGACTTGTAAAGCAGGCATT  
AAATTTTACATTGGTACCTGTAATCCAAGTTTGTGGCCTTATATACAAAATGGAGGGAGTATAAAAATCTAGCAG  
CGCAAATGCGCGGATAACTGTGCTAACTACTCAATAAGAGGTTAAAAGAAGATTCACATGCACAACCTGTAGAAAA  
CAAAAGGCCACACAACCAGTATTTAAAAAATGTACATTAATTGGACTCCCTTACTTACTTACCATGCACATATTT

TTTTCTAGTTTTTCGTGATTATCTAGGGTATTATGGTTCCACACAGATGATTCTCTATCTTTCCAACCCTATTTTTGG  
GTAGTACTACCAATGCATATATTATCAATGTTCTTCCCATAAAATGCTCCCGTGACATTAECTATCCCACCATGCATG  
GAGGAAATTAATGCATGCATATCATTAACTATCTCAACGTCTAAACCGAAACAAGGCACCGCCAGATGCCGAGGG  
CAAGCTCGTCCAACACATCCAATTGTCAATCTCCACCACTCATTTATATGCGGGGCTTGAATAAAAAAATGAT  
ACTCCCTCCGTCTAGGTGTGTAAGTCATCTTACGAAAACCAAATAATCCCAAAATAATTAAGCGTGGTGCATTAECT  
TCTACCTCGTTTTCTGTTTTTTGACATATCAACCAATAATAGATGAGGGTGTGCATGCTTTAATGACTTGAGACTATT  
AAACACGACATGCAGTGGTTAGTTCATTGCATGCAATACTATTAATTAGCAAATAAACATTAATGTCTCTCATTTTC  
CCCTCCTCCTTGGTCACGGTGCACAGCCTAAGATGACTTACTCACCTAGACGGAGGGAGTACTCACTTCAGATGGG  
AATACAAGTCGGGCACAGTTTCTAGGTCTTCAATTTGACAAGCGAATAATATGCCACAAAAAATGGTAAGAAACC  
TCACCTGGCAAGGAATATACATTTTTTTGTGGCATATAACATATATTTTTGCTTGTCAAATAGATAACCTAAAAATCGG  
TGTCTGTGTATATCCACCCAAAGGGAGTAACAATTAGGAATTAAGAGAGCTTTTATTATGGTAGACCTTCTTTTC  
ATTAAGATGCCACGTCTAAGGACATCATCAATGTATCATTCTTAAGTCGGTAATTAGCTGGGGCCACACTATGCT  
ATAGCAAACCTCGAATTCCTCCTATGCTTAATCCCAATATGGCTATGGACGTTAGGGTGAAGCCACTTGCCGGTATT  
TTCTCTGTAGTTTTAACCCCTCAAATCATGTGAGGGGAGAAAGAAATAGTTTTTGATTCTTGTGGCATGGCCTTA  
GCACTATGACCGGTCTTAAAGATTTTTGTTGCTAGGACCCCTCCACAATGCTTGAGGATATGTCATTAGACCCAT  
ATTTTTGCAACAATGGAGACATAATATAAGATTTGATGATATATAGGTTATATTTTATTAGAGATGATCTCTTAGGC  
CTGTCTCGATGGATATTATCATAAACTATTATCATTAAATGATGCTACTTTGCTTACTACATTCCCATCATTTTCATAGC  
ATCATAACATATATTTTACTGGGAATAAACTTATATTTTATAACTTAAAATTATTATCAAAATGTGACAAAATACAAG  
AGGACTAGTGAATCAGGACGGAGGCGGTAGGAAAAGAGACAGTGTACGGTGGAGCATCGGGAGAGAGAGTCC  
CAACAGTAAAAAGCCAACTCACTGAAAAGTAATGATTA AAAAGAAAGATTACATGCCCACTTGCAGTACTACCAA  
GCAAAAACACAAGGCCAATCGACCAGTAATGTATAATTA AAAACATTGTCACGGTTCCCCAGTTGAAATTTTTTTGG  
GTCATGGTGTTCACAGAGTTATTTAATGTTCTACTAGAGGGCATTAAATGTGACATATCGTAGTTTAATCGCGGTG  
GCGTGGCAATGACATTGGCAAGCAAATAAACTAGCTGAGTGTCCCTTGTCTCTCCACCCACCACTAGTCAAGCCT  
AATTAGCTAAGCTGCGTTGGAGAGGGCTAAAAGTGAGTCTCTCTGGACCTGGAATCCAAACATTCAAAAACGATTT  
GGTGAGAGCATCTCCAGTCGCATCCCCAACACGGCCTTCCAGGCGATTTTTTTCGTGCCGGCGCCTAAAAATGGCCC  
AGTCGCGTCCCCAGGAGCCCGTTTTTACCAGGCTTGGGCCGAAATCAATACAGGCGGACCCAGGCCGAACCCGGC  
GCGCTGGGGGCGCCGGGGCGAGTGGTTTTGGCGCGAAATAGCCCCGGGCCACCGAGTCTGCGAGACGGCCGCT  
TCGTCCGCTCATCGCCTTGGTTCCACGGGAATCAATGCCAAGACTGCCACGATGCCGTGCGCGGTGAGCCTTGC  
CATTGATAGCTCATCACGGGCGGCGCTCACGGGTGGCGCGGCGACGCCTCCCCTCCCGCCACGCGTACACACGG  
GCGGACTATATAAGCCGGTGGCCTCCCTCACCTTTGGCCACACCAGCCCTCGCCGTCCATCGACCGCCGTGAGC  
TCTTCTCTCCCGTGGCAGCCGCGACGCTTCTTCCCTCCCTCTCCCTCACTCCCAAGCCCGGTGGCCGCGGTTTTCC  
CCGGCGACGGCCAACGGCTTCGGTACCGCTCGCTTACGAGTGGGAGGCGTGGCTCCTGTTGAGGCCGAACATC  
CCGGCGCCACCGGACATGCGCGCATGAACGATGGGGTGGAGACTCGGCAACGGGGGAGTGCCATTCCCCCGGT  
GCCCCAGTTCGAGGCGTCCCCCGCTTCTTCGCCGCCGAGGTGACCGCGTGAAGCCTCCCTCACAGCGGAGCA  
ACTCGCCCCCACCAGTACGCCGTGAAAACCACGCGGCGTGGGCGGCGTACTTCCAGCACCGCCAGGAGCAAAG  
ACTGGCGTCCACCAACGGGGCGCCGATGGTGGGACGCTCAAGAACAGTGAGGGGCACCGCGTGTGGTGGGGC  
GCCACCGAATATGCTCGACGGCGTGTGTCTGACCTCGAGGGCGGTAACGAACCGTCTGCTGGCATACCGTCCCAT  
GGCGGCCGCCCGGTCCACCGCCGGCACGCGGGGCAATGGATGCCAGGAGGTTCCGTTCTCTCTCGACTTCTCTC  
CTCGCACTCTCTCCCGTCTTCTTCCCACTCTCCGGCTCGACGACGTTGCTCGGCGTCAAGGCCGAGCCCGCAG  
CGGAGACGCTGCTCAGCCGGCGCACTCGCAGGTCGGCATCATATAAACGAGGGCGGCCGGCGCTCTCTCTCAT  
CGGCTCTCCGCGCTTCGTCAAACCAAAGACGGAACCGAGGCTCGCGGCCGTGAAAACGGAGCCGGGGCTCCCC  
GCCGTGAAGACAGAGCACGGCGACGTGGAGCTCGATGAGGAGGCGACCCTAAAATGGGCGCGCGCCGACTGGC  
TCAAGATGGAGTGGGAGCGCCAGTGCGCCGCCCTGCAGCACTACGAACAGCGCCGCCAGGGCCGGCAGCAAGG  
AGGCGTCGTCATCTCAACGACAACGACGACGACGACGCGCCGCCACCGCCACCGGTCCGCCATGGCGACGCCGG





**Supplementary Fig. S5** Wheat *TaSINA* gene sequences retrieved from 10+Genome dataset (<https://wheat.pw.usda.gov/blastn>) using Chinese Spring TraesCS3B01G572900 gene as query. The fasta sequences include exons and introns.

>**Mace** TraesMAC3B01G633400.1 chr3B:822719144..822720339 (- strand) class=mRNA length=1196

```
ATGGGCCTCGGCGGCGGCGGCGGAGAGGGGATCCTGGCCGTGGCCGTGGTGCCCATGGAGGCCATCCCCATGG
CGGAGCCGAGATCCTCGCCGGCGGCAAGACCGTCGGCCTGCGGGCGGACCTGCTCGACTGCCACAACCTGCCGC
CTCCCCCTCAAGCCCCCATATTCAAGGTGAGATCCGCCGGCCGCCCTTCTCCCAAGATTCATTTTTCCGTTTTCT
TGAATCTGGCACGCGGTGACCGAGCGTATCTGGTGTGCATGAATCTTGCCGGCAGTGCGACGCCGAGCACCTGG
TCTGCTCCTCCTGCCGCGGCGCCACGCCGAGGCCTGCGGCGGCCGCGCCGCCGTCCACTCCGCGCTCGCCGACAT
CTTCGCGGCCGCCGCCACCGTGCCCTGCGGCTACGAGCGCTACGGCTGCGACGCGGGCGGCGTGGTGTACCACG
AGGCGGCCGACCACCGGCGCGCGTGCCAGCACGCGCCCTGCTGCTGCCCGGACCGCGCGGGCGCGGCCGGCAGC
GGGGGCTGCGGCTTCGTCGGCTCCCGCCAGGACCTGCTCGACCACATCTCCGGGCCCGACCACTCGCGCCCCATC
ATCGTCGTCCGCTACGGCCAGCCCTGGAACCTCAGCCTGCCGCTCTCGCGCCGCTGGCACATCCTCGTCGGTGAGG
AGGACAAGGCGGTGGCCGCCGCCGCGGGCGCCGACCGGCACCGCAACCTTCTCCTCGTCTCCCTCGGGGAGCGC
GGCGCCACCACGGCCGTGTCGCTGGTGTGCGTCCGGGCGGACGGCACGCGCCGGGCGCGCCGAGTTCGCGTG
CAAGCTCGCCGTGGAGAGCGACGGCTGCAGGCTGACCCTGGAGTCGCCGCTGGTGTGCAGCAGCTCCCTGTCCG
GCGGCTGCCCGGCGAGGTCAAGTGCTGCCGGTGCCCAAAGACTTTCTCTCCGGCGACAGTGTGCCCCCTCAGCA
TCCACATCGAGAAGCTCCCGTTGCCCCGCTCCTCCTTAGGACCAGGAGTGCGCCGGCCTGTACCTCCCCGGT
CGCCGCCACGCTCCTCCTTGCCCGGCGGCCACCATCCCGCTTCCCGTCCGTCCTCCGCGGCTCCTCCGACAACG
TCGCAGTCAAGACGGTGATCACCGATCAGAGCTACAAGAAACGGAAGTCTGCCAACCCAAGGAAGCTGTAG
```

```
ESPLVSSSLSGGLPGEVKCLPVPKDFLSGDSVPLSIHIEKLPVAPAPPLGPGVAPACTSPVAATPPPCPAATIPPSRPSSA
GSSDNVAVKTVITDQSYKKRKSANPRKL
```

Blastn score: 2695.52 (2988), E value: 0, Identity: 1494/1494 (100%), Gaps: 0/1494 (0%), Strand: + / -

> **Longreach Lancer** TraesLAC3B01G635900.1 chr3B:812952783..812953978 (- strand) class=mRNA length=1196

```
ATGGGCCTCGGCGGCGGCGGCGGAGAGGGGATCCTGGCCGTGGCCGTGGTGCCCATGGAGGCCATCCCCATGG
CGGAGCCGAGATCCTCGCCGGCGGCAAGACCGTCGGCCTGCGGGCGGACCTGCTCGACTGCCACAACCTGCCGC
CTCCCCCTCAAGCCCCCATATTCAAGGTGAGATCCGCCGGCCGCCCTTCTCCTCAAGATTCATTTTTCCGTTTTCT
TGAATCTGGCACGCGGTGACCGAGCGTATCTGGTGTGCATGAATCTTGCCGGCAGTGCGACGCCGAGCACCTGG
TCTGCTCCTCCTGCCGCGGCGCCACGCCGAGGCCTGCGGCGGCCGCGCCGCCGTCCACTCCGCGCTCGCCGACAT
CTTCGCGGCCGCCGCCACCGTGCCCTGCGGCTACGAGCGCTACGGCTGCGACGCGGGCGGCGTGGTGTACCACG
AGGCGGCCGACCACCGGCGCGCGTGCCAGCACGCGCCCTGCTGCTGCCCGGACCGCGCGGGCGCGGCCGGCAGC
GGGGGCTGCGGCTTCGTCGGCTCCCGCCAGGACCTGCTCGACCACATCTCCGGGCCCGACCACTCGCGCCCCATC
ATCGTCGTCCGCTACGGCCAGCCCTGGAACCTCAGCCTGCCGCTCTCGCGCCGCTGGCACATCCTCGTCGGCGAGG
AGGACAAGGCGGTGGCCGCCGCCGCGGGCGCCGACCGGCACCGCAACCTTCTCCTCGTCTCCCTCGGGGAGCGC
GGCGCCACCACGGCCGTGTCGCTGGTGTGCGTCCGGGCGGACGGCACGCGCCGGGCGCGCCGAGTTCGCGTG
CAAGCTCGCCGTGGAGAGCGACGGCTGCAGGCTGACCCTGGAGTCGCCGCTGGTGTGCAGCAGCTCCCTGTCCG
GCGGCTGCCCGGCGAGGTCAAGTGCTGCCGGTGCCCAAAGACTTTCTCTCCGGCGACAGTGTGCCCCCTCAGCA
TCCACATCGAGAAGCTCCCGTTGCCCCGCTCCTCCTTAGGACCAGGAGTGCGCCGGCCTGTACCTCCCCGGT
```

CGCCGCCACGCCTCCTCCTTGCCCGGGCGGCCACCATCCCGCCTTCCCGTCCGTCCTCCGCCGGCTCCTCCGACAACG  
TCGCAGTCAAGACGGTGATCACCGATCAGAGCTACAAGAAACGGAAGTCTGCCAACCAAGGAAGCTGTAG

ESPLVCSSSLGGLPGEVKCLPVPKDFLSGDSVPLSIHIEKLPVAPAPPLGPGVAPACTSPVAATPPPCPAATIPPSRPSSA  
GSSDNVAVKTVITDQSYKKRKSANPRKL

Blastn score: 2674.78 (2965), E value: 0, Identity: 1492/1498 (99.6%), Gaps: 4/1498 (0.3%), Strand: + / -

> **CDC Stanley** chr3B TraesSTA3B01G630200.1 chr3B:829890824..829892019 (- strand) class=mRNA  
length=1196

ATGGGCCTCGGCGGGCGGGCGGAGAGGGGATCCTGGCCGTGGCCGTGGTGCCCATGGAGGCCATCCCCATGG  
CGGAGCCGCAGATCCTCGCCGGCGGCAAGACCGTCGGCCTGCGGGCGGACCTGCTCGACTGCCACAACCTGCCG  
CTCCCCCTCAAGCCCCCATATTCAAGGTGAGATCCGCCGGCCGCCCTTCCCCAAGATTCATTTTCCGTTTTCT  
TGAATCTGGCACGGCGTGACCGAGCGTATCTGGTGTGCATGAATCTTGCCGGCAGTGCACGCGGAGCACCTGG  
TCTGCTCCTCCTGCCGCGGCGCCACGCCGAGGCCTGCGGCGGCCGCGCCGCCGCTCCACTCCGCGCTCGCCGACAT  
CTTCGCGGCCGCCGCCACCGTGCCCTGCGGCTACGAGCGCTACGGCTGCGACGCGGGCGGCGTGGTGTACCACG  
AGGCGGCCGACCACGGCGCGCGTGCCAGCACGCGCCCTGCTGCTGCCCGGACCGCGCGGGCGCGGCCGGC  
GGGGGCTGCGGCTTCGTCGGCTCCCGCCAGGACCTGCTCGACCACATCTCCGGGCCCGACCACTCGCGCCCCATC  
ATCGTCGTCGCTACGGCCAGCCCTGGAACCTCAGCCTGCCGCTCTCGCGCCGCTGGCACATCCTCGTGGTGAGG  
AGGACAAGGCGGTGGCCGCCGCCGCGGGCGCCGACCGGCACCGCAACCTTCTCTCGTCTCCCTCGGGAGCGC  
GGCGCCACCACGGCCGTGTCGCTGGTGTGCGTCCGGGCGGACGGCACGGCGCCGGGCGCGCCGAGTTCGCGTG  
CAAGCTCGCCGTGGAGAGCGACGGCTGCAGGCTGACCCTGGAGTCGCCGCTGGTGTGCAGCAGCTCCCTGTCCG  
GCGGCTGCCCGGCGAGGTCAAGTGCTGCCGTTGCCAAAGACTTTCTCTCCGGCGACAGTGTGCCCTCAGCA  
TCCACATCGAGAAGCTCCCGTTGCCCCGCTCCTCTAGGACCAGGAGTGCGCCGGCCTGTACCTCCCCGGT  
CGCCGCCACGCTCCTCCTTGCCCGGGCGGCCACCATCCCGCCTTCCCGTCCGTCCTCCGCCGGCTCCTCCGACAACG  
TCGCAGTCAAGACGGTGATCACCGATCAGAGCTACAAGAAACGGAAGTCTGCCAACCAAGGAAGCTGTAG

ESPLVCSSSLGGLPGEVKCLPVPKDFLSGDSVPLSIHIEKLPVAPAPPLGPGVAPACTSPVAATPPPCPAATIPPSRPSSA  
GSSDNVAVKTVITDQSYKKRKSANPRKLX

> **CDC Landmark** chr3B chr3B:821846270..821847465 (+ strand) class=mRNA length=1196

ATGGGCCTCGGCGGGCGGGCGGAGAGGGGATCCTGGCCGTGGCCGTGGTGCCCATGGAGGCCATCCCCATGG  
CGGAGCCGCAGATCCTCGCCGGCGGCAAGACCGTCGGCCTGCGGGCGGACCTGCTCGACTGCCACAACCTGCCG  
CTCCCCCTCAAGCCCCCATATTCAAGGTGAGATCCGCCGGCCGCCCTTCCCCAAGATTCATTTTCCGTTTTCT  
TGAATCTGGCACGGCGTGACCGAGCGTATCTGGTGTGCATGAATCTTGCCGGCAGTGCACGCGGAGCACCTGG  
TCTGCTCCTCCTGCCGCGGCGCCACGCCGAGGCCTGCGGCGGCCGCGCCGCCGCTCCACTCCGCGCTCGCCGACAT  
CTTCGCGGCCGCCGCCACCGTGCCCTGCGGCTACGAGCGCTACGGCTGCGACGCGGGCGGCGTGGTGTACCACG  
AGGCGGCCGACCACGGCGCGCGTGCCAGCACGCGCCCTGCTGCTGCCCGGACCGCGCGGGCGCGGCCGGC  
GGGGGCTGCGGCTTCGTCGGCTCCCGCCAGGACCTGCTCGACCACATCTCCGGGCCCGACCACTCGCGCCCCATC  
ATCGTCGTCGCTACGGCCAGCCCTGGAACCTCAGCCTGCCGCTCTCGCGCCGCTGGCACATCCTCGTGGTGAGG  
AGGACAAGGCGGTGGCCGCCGCCGCGGGCGCCGACCGGCACCGCAACCTTCTCTCGTCTCCCTCGGGAGCGC  
GGCGCCACCACGGCCGTGTCGCTGGTGTGCGTCCGGGCGGACGGCACGGCGCCGGGCGCGCCGAGTTCGCGTG  
CAAGCTCGCCGTGGAGAGCGACGGCTGCAGGCTGACCCTGGAGTCGCCGCTGGTGTGCAGCAGCTCCCTGTCCG  
GCGGCTGCCCGGCGAGGTCAAGTGCTGCCGTTGCCAAAGACTTTCTCTCCGGCGACAGTGTGCCCTCAGCA  
TCCACATCGAGAAGCTCCCGTTGCCCCGCTCCTCTAGGACCAGGAGTGCGCCGGCCTGTACCTCCCCGGT

CGCCGCCACGCCTCCTCCTTGCCCGGGGCCACCATCCCGCCTTCCCGTCCGTCTCCGCCGGCTCCTCCGACAACG  
TCGCAGTCAAGACGGTGATCACCGATCAGAGCTACAAGAAACGGAAGTCTGCCAACCCAAGGAAGCTGTAG

ESPLVCSSSLGGLPGEVKCLPVPKDFLSGDSVPLSIHIEKLPVAPAPPLGPGVAPACTSPVAATPPPCPAATIPPSRPSSA  
GSSDNVAVKTVITDQSYKKRKSANPRKLX

Blastn score: 2695.52 (2988), E value: 0, Identity: 1494/1494 (100%), Gaps: 0/1494 (0%), Strand: + / +

> **PI190962 *Triticum aestivum ssp. spelta*** chr3B chr3B:807307688..807308883 (- strand) class=mRNA  
length=1196

ATGGGCCTCGGCGGGCGGGCGGAGAGGGGATCCTGGCCGTGGCCGTGGTGCCCATGGAGGCCATCCCCATGG  
CGGAGCCGCAGATCCTCGCCGGCGGCAAGACCGTCGGCCTGCGGGCGGACCTGCTCGACTGCCACAACCTGCCGC  
CTCCCCCTCAAGCCCCCATATTCAAGGTGAGATCCGCCGGCCGCCCTTCTCCAAGATTCATTTTTCCGTTTTCT  
TGAATCTGGCACGGCGTGACCGAGCGTATCTGGTGTGCATGAATCTTGCCGGCAGTGCAGCGCCGAGCACCTGG  
TCTGCTCCTCCTGCCGCGGCGCCACGCCGAGGCCTGCGGCGGCCGCGCCGCCGTCCACTCCGCGCTCGCCGACAT  
CTTCGCGGCCGCCACCCTGCCCTGCGGCTACGAGCGCTACGGCTGCGACGCCGGCGGGCGTGGTGTACCACGA  
GGCCGCCGACCACCGGCGCGCGTGCAGCACGCGCCCTGCTGCTGCCCGGACCGCGGGCGCGGCCGGCATCG  
GGGGCTGCGGCTTCGTGGCTCCCGCCAGGACCTGCTCGACCACATCTCCGGCCCCGACCACTCGCGCCCCATCAT  
CGTCGTCCGCTACGGCCAGCCGTGGAACCTCAGCCTGCCGCTCTCGCGCCGCTGGCACATCCTCGTCGGCGAGGA  
GGACAAGGCGGTGGCCGCCCGCGGGCGCCGACCGGCACCGCAACCTTCTCCTCGTCTCCCTCGGCGAGCGCG  
GCGCCACCACGGCCGTGTCGCTGGTGTGCGTCCGGGCGGACGGCACGGCGCCGGGCGCGCCGAGTTCGCGTGC  
AAGCTCGCCGTGGAGAGCGACGGCTGCAGGCTGACCCTGGAGTCGCTCTGGTGTGCAGCAGCTCCCTGTCCGGC  
GGCCTGCCGGGCGAGGTCAAGTGCCTGCCGGTGCCAAAGACTTCTGTCCGGCGACAGTGTGCCCTCAGCATC  
CACATCGAGAAGCTCCCGGCTCCCCAGCTCCTCCTTAGGACCAGGAGTGGCGCCGGCCTGTACTTCCCCGGTGC  
CCGCCACCCCTCCTCCCTGCCCGGCCGCCACCATCCCGCCTTCTCGTCCGTCTCCGCCGGCTCCTCCGACAACGTC  
GCCGTTAAGACGGTGATCACCGATCAGAGCTACAAGAAACGGAAGTCCGCCAACCCAAGGAAGCTGTAG

ESPLVCSSSLGGLPGEVKCLPVPKDFLSGDSVPLSIHIEKLPAPPAPPLGPGVAPACTSPVAATPPPCPAATIPPSRPSSA  
GSSDNVAVKTVITDQSYKKRKSANPRKLX

Blastn score: 2538.63 (2814), E value: 0, Identity: 1460/1493 (97.8%), Gaps: 3/1493 (0.2%), Strand: + / -

> **Norin 61** chr3B chr3B:823641574..823642769 (+ strand) class=mRNA length=1196

ATGGGCCTCGGCGGGCGGGCGGAGAGGGGATCCTGGCCGTGGCCGTGGTGCCCATGGAGGCCATCCCCATGG  
CGGAGCCGCAGATCCTCGCCGGCGGCAAGACCGTCGGCCTGCGGGCGGACCTGCTCGACTGCCACAACCTGCCGC  
CTCCCCCTCAAGCCCCCATATTCAAGGTGAGATCCGCCGGCCGCCCTTCTCCAAGATTCATTTTTCCGTTTTCT  
TGAATCTGGCACGGCGTGACCGAGCGTATCTGGTGTGCATGAATCTTGCCGGCAGTGCAGCGCCGAGCACCTGG  
TCTGCTCCTCCTGCCGCGGCGCCACGCCGAGGCCTGCGGCGGCCGCGCCGCCGTCCACTCCGCGCTCGCCGACAT  
CTTCGCGGCCGCCACCCTGCCCTGCGGCTACGAGCGCTACGGCTGCGACGCCGGCGGGCGTGGTGTACCACGA  
GGCCGCCGACCACCGGCGCGCGTGCAGCACGCGCCCTGCTGCTGCCCGGACCGCGGGCGCGGCCGGCATCG  
GGGGCTGCGGCTTCGTGGCTCCCGCCAGGACCTGCTCGACCACATCTCCGGCCCCGACCACTCGCGCCCCATCAT  
CGTCGTCCGCTACGGCCAGCCGTGGAACCTCAGCCTGCCGCTCTCGCGCCGCTGGCACATCCTCGTCGGCGAGGA  
GGACAAGGCGGTGGCCGCCCGCGGGCGCCGACCGGCACCGCAACCTTCTCCTCGTCTCCCTCGGCGAGCGCG  
GCGCCACCACGGCCGTGTCGCTGGTGTGCGTCCGGGCGGACGGCACGGCGCCGGGCGCGCCGAGTTCGCGTGC

AAGCTCGCCGTGGAGAGCGACGGCTGCAGGCTGACCCTGGAGTCGCCTCTGGTGTGCAGCAGCTCCCTGTCCGGC  
GGCTGCCGGGCGAGGTCAAGTGCCTGCCGGTGCCCAAAGACTTCTGTCCGGCGACAGTGTGCCCTCAGCATC  
CACATCGAGAAGCTCCCGGCTCCCCAGCTCCTCCTTAGGACCAGGAGTGGCGCCGGCCTGTACTTCCCGGTGCG  
CCGCCACCCCTCCTCCCTGCCGGCCGCCACCATCCCGCCTTCTCGTCCGTCTCCGCCGGCTCCTCCGACAACGTC  
GCCGTTAAGACGGTGATCACCGATCAGAGCTACAAGAAACGGAAGTCCGCCAACCAAGGAAGCTGTAG

ESPLVCSSSLGGLPGEVKCLPVPKDFLSGDSVPLSIHIEKLPAPPAPPLGPGVAPACTSPVAATPPPCPAATIPPSRPSSA  
GSSDNVAVKTVITDQSYKKRKSANPRKLX

Blastn score: 2538.63 (2814), E value: 0, Identity: 1460/1493 (97.8%), Gaps: 3/1493 (0.2%), Strand: + / +

>**SY Mattis** TraesSYM3B01G629300.1 chr3B:808881627..808882822 (- strand) class=mRNA length=1196  
ATGGGCCTCGGCGGGCGGCGGAGAGGGGATCCTGGCCGTGGCCGTGGTGTCCCATGGAGGCCATCCCCATGG  
CGGAGCCGACAGATCCTCGCCGGCGGCAAGACCGTCGGCCTGCGGGCGGACCTGCTCGACTGCCACAACCTGCCG  
CTCCCCCTCAAGCCCCCATATTCAAGGTGAGATCCGCCGGCCGCCCTTCTTCCAAGATTCATTTTTCCGTTTTCT  
TGAATCTGGCACGGCGTGACCGAGCGTATCTGGTGTGCATGAATCTTGGCCGGCAGTGCAGCGCCGAGCACCTGG  
TCTGCTCCTCCTGCCGGCGCCACGCCGAGGCCTGCGGGCGCCGCGCCGCCGTCCACTCCGCGCTCGCCGACAT  
CTTCGCGGCCCGCCACCGTGCCCTGCGGCTACGAGCGCTACGGCTGCGACGCCGGCGGCGTGGTGTACCACGA  
GGCCGCCGACCACCGGCGCGCGTGCAGCACGCGCCCTGCTGCTGCCCGACCGCGCGGGCGCGGCCGGCATCG  
GGGGCTGCGGCTTCGTGGCTCCCGCCAGGACCTGCTCGACCACATCTCCGGCCCCGACCACTCGCGCCCCATCAT  
CGTCGTCCGCTACGGCCAGCCGTGGAACCTCAGCCTGCCGCTCTCGCGCCGCTGGCACATCCTCGTCGGCGAGGA  
GGACAAGGCGGTGGCCGCCCGCGGGCGCCGACCGGCACCGCAACCTTTCCTCGTCTCCCTCGGCGAGCGCG  
GCGCCACCACGGCCGTGTGCTGGTGTGCGTCCGGGCGGACGGCACGGCGCCGGGCGCGCCGAGTTCGCGTGC  
AAGCTCGCCGTGGAGAGCGACGGCTGCAGGCTGACCCTGGAGTCGCCTCTGGTGTGCAGCAGCTCCCTGTCCGGC  
GGCCTGCCGGGCGAGGTCAAGTGCCTGCCGGTGCCCAAAGACTTCTGTCCGGCGACAGTGTGCCCTCAGCATC  
CACATCGAGAAGCTCCCGGCTCCCCAGCTCCTCCTTAGGACCAGGAGTGGCGCCGGCCTGTACTTCCCGGTGCG  
CCGCCACCCCTCCTCCCTGCCGGCCGCCACCATCCCGCCTTCTCGTCCGTCTCCGCCGGCTCCTCCGACAACGTC  
GCCGTTAAGACGGTGATCACCGATCAGAGCTACAAGAAACGGAAGTCCGCCAACCAAGGAAGCTGTAG

ESPLVCSSSLGGLPGEVKCLPVPKDFLSGDSVPLSIHIEKLPAPPAPPLGPGVAPACTSPVAATPPPCPAATIPPSRPSSA  
GSSDNVAVKTVITDQSYKKRKSANPRKLX

Blastn score: 2538.63 (2814), E value: 0, Identity: 1460/1493 (97.8%), Gaps: 3/1493 (0.2%), Strand: + / -

>**Julius** TraesJUL3B01G636200.1 chr3B chr3B:830706300..830707495 (- strand) class=mRNA  
length=1196

ATGGGCCTCGGCGGGCGGCGGAGAGGGGATCCTGGCCGTGGCCGTGGTGTCCCATGGAGGCCATCCCCATGG  
CGGAGCCGACAGATCCTCGCCGGCGGCAAGACCGTCGGCCTGCGGGCGGACCTGCTCGACTGCCACAACCTGCCG  
CTCCCCCTCAAGCCCCCATATTCAAGGTGAGATCCGCCGGCCGCCCTTCTTCCAAGATTCATTTTTCCGTTTTCTT  
GAATCTGGCACGGCGTGACCGAGCGTATCTGGTGTGCATGAATCTTGGCCGGCAGTGCAGCGCCGAGCACCTGGT  
CTGCTCCTCCTGCCGGCGGCCACGCCGAGGCCTGCGGGCGCCGCGCCGCCGTCCACTCCGCGCTCGCCGACAT  
CTTCGCGGCCCGCCACCGTGCCCTGCGGCTACGAGCGCTACGGCTGCGACGCCGGCGGCGTGGTGTACCACGA  
GGCCGCCGACCACCGGCGCGCGTGCAGCACGCGCCCTGCTGCTGCCCGACCGCGCGGGCGCGGCCGGCATCG  
GGGGCTGCGGCTTCGTGGCTCCCGCCAGGACCTGCTCGACCACATCTCCGGCCCCGACCACTCGCGCCCCATCAT  
CGTCGTCCGCTACGGCCAGCCGTGGAACCTCAGCCTGCCGCTCTCGCGCCGCTGGCACATCCTCGTCGGCGAGGA

GGACAAGGCGGTGGCCGCCGCCGGCGGGCGCCGACCGGCACCGCAACCTCTTCCTCGTCTCCCTCGGCGAGCGCG  
GCGCCACCACGGCCGTGTCGCTGGTGTGCGTCCGGGCGGACGGCACGGCGCCGGGCGCGCCGAGTTCGCGTGC  
AAGCTCGCCGTGGAGAGCGACGGCTGCAGGCTGACCCTGGAGTCGCCTCTGGTGTGCAGCAGCTCCCTGTCCGGC  
GGCTGCCGGGCGAGGTCAAGTGCTGCCGGTGCCCAAAGACTTCTGTCCGGCGACAGTGTGCCCCTCAGCATC  
CACATCGAGAAGCTCCCGGCTCCCCAGCTCCTCTAGGACCAGGAGTGGCGCCGGCCTGTACTTCCCCGGTGC  
CCGCCACCCCTCCTCCCTGCCGGCGCCACCATCCCGCCTTCTCGTCCGTCTCCGCCGGCTCCTCCGACAACGTC  
GCCGTTAAGACGGTGATCACCGATCAGAGCTACAAGAAACGGAAGTCCGCCAACCAAGGAAGCTGTAG

ESPLVCSSSLGGLPGEVKCLPVPKDFLSGDSVPLSIHIEKLPAPPAPPLGPGVAPACTSPVAATPPPCPAATIPPSRPSSA  
GSSDNVAVKTVITDQSYKKRKSANPRKLX

Blastn score: 2538.63 (2814), E value: 0, Identity: 1460/1493 (97.8%), Gaps: 3/1493 (0.2%), Strand: + / -

>**Jagger** TraesJAG3B01G629200.1 chr3B chr3B:827852942..827854137 (+ strand) class=mRNA  
length=1196

ATGGGCCTCGGCGGCGGCGGCGGAGAGGGGATCCTGGCCGTGGCCGTGGTGGCCATGGAGGCCATCCCCATGG  
CGGAGCCGCAGATCCTCGCCGGCGGCAAGACCgTCGGCTGCGGGCGGACCTGCTCGACTGCCACAACCTGCCGC  
TCCCCCTCAAGCCCCCATATTCAAGGTGAGATCCGCCGGCCGCCCTTCTCCAAGATTCATTTTTCCGTTTTCTT  
GAATCTGGCACGGCGTGACCGAGCGTATCTGGTGTGCATGAATCTTGCCGGCAGTGCACGCCGAGCACCTGGT  
CTGCTCCTCCTGCCGCGGCGCCACGCCGAGGCCTGCGGCGGCCGCGCCGCGCCGTCCACTCCGCGCTCGCCGACAT  
CTTCGCGGCCGCCACCGTGCCCTGCGGCTACGAGCGCTACGGCTGCGACGCCGGCGGCGTGGTGTACCACGA  
GGCCGCCGACCACCGGCGCGCGTGCAGCACGCGCCCTGCTGCTGCCGGACCGCGCGGGCGCGGCCGGCATCG  
GGGGCTGCGGCTTCGTGGCTCCCGCCAGGACCTGCTCGACCACATCTCCGGCCCCGACCACTCGCGCCCCATCAT  
CGTCGTCCGCTACGGCCAGCCGTGGAACCTCAGCCTGCCGCTCTCGCGCCGCTGGCACATCCTCGTCGGCGAGGA  
GGACAAGGCGGTGGCCGCCGCCGGCGGGCGCCGACCGGCACCGCAACCTCTTCCTCGTCTCCCTCGGCGAGCGCG  
GCGCCACCACGGCCGTGTCGCTGGTGTGCGTCCGGGCGGACGGCACGGCGCCGGGCGCGCCGAGTTCGCGTGC  
AAGCTCGCCGTGGAGAGCGACGGCTGCAGGCTGACCCTGGAGTCGCCTCTGGTGTGCAGCAGCTCCCTGTCCGGC  
GGCCTGCCGGGCGAGGTCAAGTGCTGCCGGTGCCCAAAGACTTCTGTCCGGCGACAGTGTGCCCCTCAGCATC  
CACATCGAGAAGCTCCCGGCTCCCCAGCTCCTCTAGGACCAGGAGTGGCGCCGGCCTGTACTTCCCCGGTGC  
CCGCCACCCCTCCTCCCTGCCGGCGCCACCATCCCGCCTTCTCGTCCGTCTCCGCCGGCTCCTCCGACAACGTC  
GCCGTTAAGACGGTGATCACCGATCAGAGCTACAAGAAACGGAAGTCCGCCAACCAAGGAAGCTGTAG

LESPLVCSSSLGGLPGEVKCLPVPKDFLSGDSVPLSIHIEKLPAPPAPPLGPGVAPACTSPVAATPPPCPAATIPPSRPSSA  
GSSDNVAVKTVITDQSYKKRKSANPRKL

Blastn score: 2538.63 (2814), E value: 0, Identity: 1460/1493 (97.8%), Gaps: 3/1493 (0.2%), Strand: + / +

>**Arina** TraesARI3B01G636300.1 chr3B chr3B:861871096..861872291 (- strand) class=mRNA  
length=1196

ATGGGCCTCGGCGGCGGCGGCGGAGAGGGGATCCTGGCCGTGGCCGTGGTGGCCATGGAGGCCATCCCCATGG  
CGGAGCCGCAGATCCTCGCCGGCGGCAAGACCgTCGGCTGCGGGCGGACCTGCTCGACTGCCACAACCTGCCGC  
TCCCCCTCAAGCCCCCATATTCAAGGTGAGATCCGCCGGCCGCCCTTCTCCAAGATTCATTTTTCCGTTTTCT  
TGAATCTGGCACGGCGTGACCGAGCGTATCTGGTGTGCATGAATCTTGCCGGCAGTGCACGCCGAGCACCTGG  
TCTGCTCCTCCTGCCGCGGCGCCACGCCGAGGCCTGCGGCGGCCGCGCCGCGCCGTCCACTCCGCGCTCGCCGACAT

CTTCGCGGCCGCGCCACCGTGCCCTGCGGCTACGAGCGCTACGGCTGCGACGCCGGCGGGCGTGGTGTACCACGA  
GGCCGCCGACCACCGGCGCGCTGCCAGCACGCGCCCTGCTGCTGCCCGGACCGCGCGGGCGCGGCCGGCATCG  
GGGGCTGCGGCTTCGTTCGGCTCCCGCCAGGACCTGCTCGACCACATCTCCGGCCCCGACCACTCGCGCCCCATCAT  
CGTCGTCCGCTACGGCCAGCCGTGGAACCTCAGCCTGCCGCTCTCGCGCCGCTGGCACATCCTCGTCGGCGAGGA  
GGACAAGGCGGTGGCCGCCCGCGGGCGCCGACCGGCACCGCAACCTTCTCCTCGTCTCCCTCGGCGAGCGCG  
GCGCCACCACGGCCGTGTCGCTGGTGTGCGTCCGGGCGGACGGCACGGCGCCGGGCGCGCCGAGTTCGCGTGC  
AAGCTCGCCGTGGAGAGCGACGGCTGCAGGCTGACCCTGGAGTCGCCTCTGGTGTGCAGCAGCTCCCTGTCCGGC  
GGCCTGCCGGGCGAGGTCAAGTGCCTGCCGGTGCCCAAAGACTTCTGTCCGGCGACAGTGTGCCCTCAGCATC  
CACATCGAGAAGCTCCCGGCTCCCCAGCTCCTCCTTAGGACCAGGAGTGGCGCCGGCCTGTACTTCCCCGGTGC  
CCGCCACCCCTCCTCCCTGCCCGGCCGCCACCATCCCGCCTTCTCGTCCGTCTCCGCCGGCTCCTCCGACAACGTC  
GCCGTTAAGACGGTGATCACCGATCAGAGCTACAAGAAACGGAAGTCCGCCAACCCAAGGAAGCTGTAG

ESPLVCSSSLGGLPGEVKCLPVPKDFLSGDSVPLSIHIEKLPAPPAPPLGPGVAPACTSPVAATPPPCPAATIPPSRPSSA  
GSSDNVAVKTVITDQSYKKRKSANPRKL

Blastn score: 2538.63 (2814), E value: 0, Identity: 1460/1493 (97.8%), Gaps: 3/1493 (0.2%), Strand: + / -
